# Supplementary material
Source: publisher figshare collection journal article supplement (https://acs.figshare.com/ndownloader/files/16356719)
Supplement: Supplementary file 1 [file 16356719]

## **Supporting Information**

### **Ligand-Dependent Controlled Copper-Catalyzed Regio- and Stereoselective Silaboration of Alkynes**

Meng Zhao,<sup>a</sup> Cui-Cui Shan,<sup>a</sup> Zi-Lu Wang,<sup>a</sup> Chao Yang, Yao Fu,<sup>\*</sup> and Yun-He Xu<sup>\*</sup>

<sup>a</sup>*Department of Chemistry, University of Science and Technology of China, Hefei, Anhui, 230026, P. R. China*

E-mail: [xyh0709@ustc.edu.cn](mailto:xyh0709@ustc.edu.cn); [fuyao@ustc.edu.cn](mailto:fuyao@ustc.edu.cn)

#### **Table of Contents**

|                                                                           |            |
|---------------------------------------------------------------------------|------------|
| <b>I. General Information.....</b>                                        | <b>S2</b>  |
| <b>II. Experimental Procedures.....</b>                                   | <b>S2</b>  |
| 2.1 General Procedures for the Synthesis of Starting Materials .....      | S2         |
| 2.2 General Procedures for Copper-Catalyzed Silaboration of Alkynes ..... | S3         |
| <b>III. Characterization Data and Spectrum of Products .....</b>          | <b>S5</b>  |
| <b>V. References .....</b>                                                | <b>S80</b> |

## I. General Information

Experiments involving moisture and/or air sensitive components were performed in oven-dried glassware under a positive pressure of argon or glove box. Flash chromatography was performed using 200-300 mesh silica gel with the indicated solvent system. Other reagents were commercially purchased and were used as received without further purification for the reactions.  $^1\text{H}$ -NMR and  $^{13}\text{C}$ -NMR spectra were recorded at 25 °C on a Bruker Advance 400M NMR spectrometers ( $\text{CDCl}_3$  or  $\text{DMSO}-d_6$  as solvent). Chemical shifts for  $^1\text{H}$  NMR spectra are reported as  $\delta$  in units of parts per million (ppm) downfield from  $\text{SiMe}_4$  ( $\delta = 0.0$ ) and relative to the signal of chloroform- $d$  ( $\delta = 7.26$ , singlet) or  $\text{DMSO}-d_6$  ( $\delta = 2.50$ , singlet). Multiplicities were given as: s (singlet); d (doublet); t (triplet); q (quartet); dd (doublet of doublets); dt (doublet of triplets); m (multiplets) and *etc.* Coupling constants are reported as a  $J$  value in Hz.  $^{13}\text{C}$  NMR spectra are reported as  $\delta$  in units of parts per million (ppm) downfield from  $\text{SiMe}_4$  ( $\delta = 0.0$ ) and relative to the signal of chloroform- $d$  ( $\delta = 77.16$ , triplet). High-resolution mass spectral analysis (HRMS) was performed on Water XEVO G2 Q-TOF (Waters Corporation).

## II. Experimental Procedures

### 2.1 General Procedures for the Synthesis of Starting Materials

Compounds **1f**,<sup>1</sup> **1h-1m**,<sup>2-7</sup> **1u**,<sup>8</sup> **1u'**,<sup>9</sup> **1x**<sup>10</sup> and **1y**<sup>11</sup> were prepared according to the previously reported procedures.

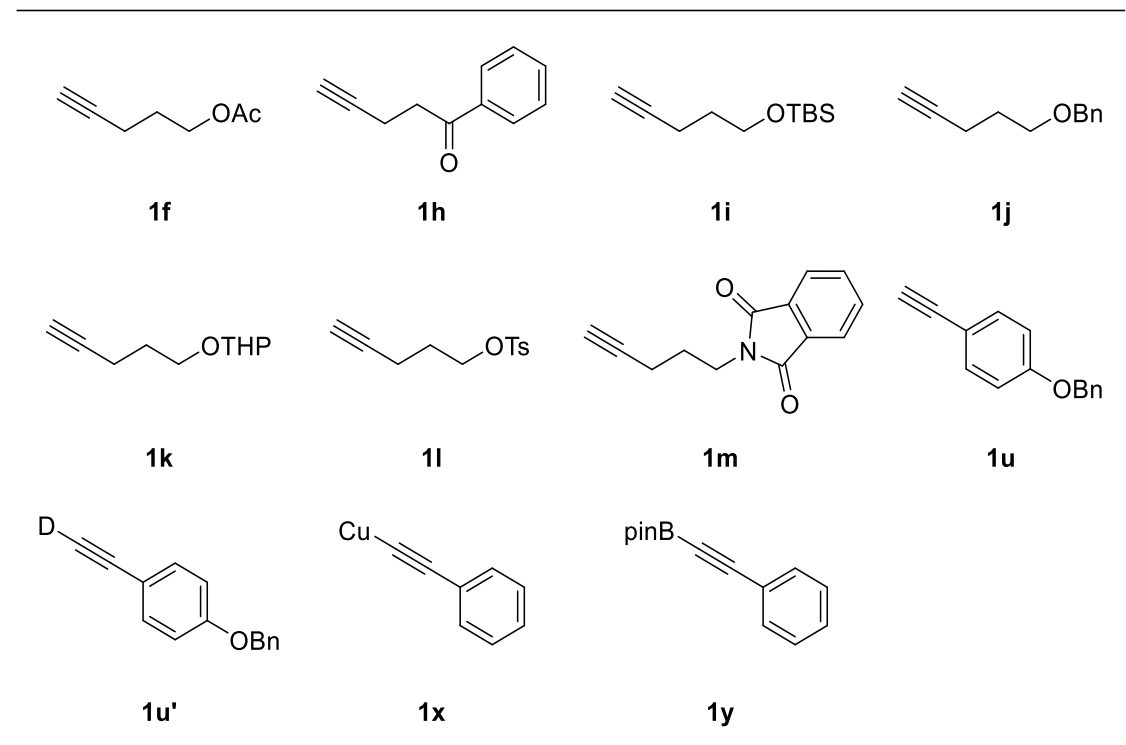

## 2.2 General Procedures for Copper-Catalyzed Silaboration of Alkynes

### A. General Procedure A:

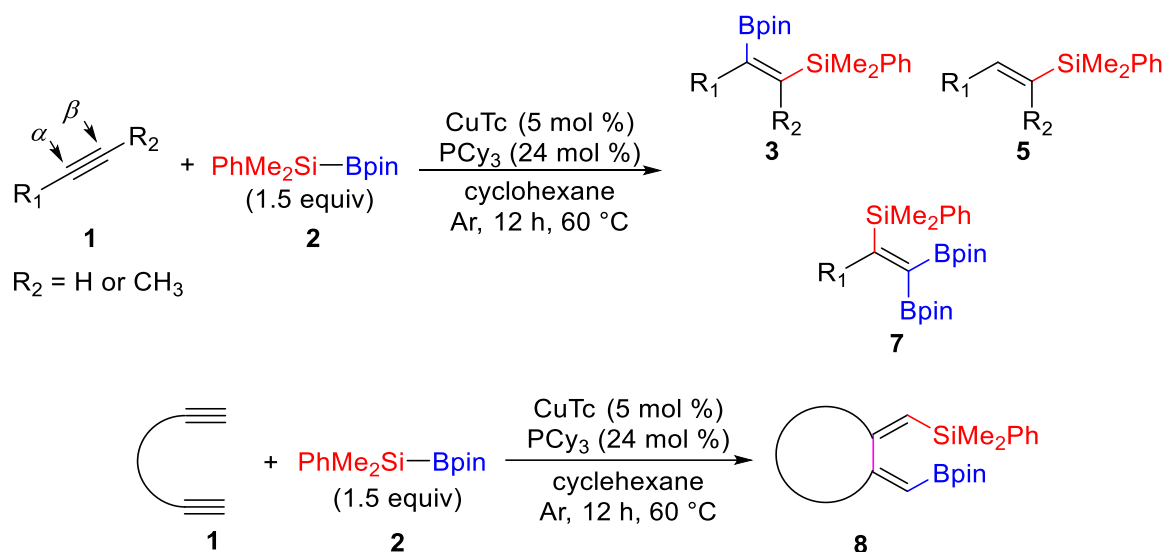

An oven-dried 10 mL Schlenk tube equipped with a magnetic stirrer was charged with  $\text{CuTc}$  (1.9 mg, 0.010 mmol, 5 mol %) and  $\text{PCy}_3$  (13.4 mg, 0.048 mmol, 24 mol %). Then, the tube was sealed with a septum and removed from glove box. The mixture in dry cyclohexane solvent (1 mL, 0.2 M) was stirred for 1 h at room temperature. Subsequently, the alkyne (0.2 mmol, 1.0 equiv) and  $\text{Me}_2\text{PhSi-Bpin}$  (78.6 mg, 0.3 mmol, 1.5 equiv) were added by syringe under argon atmosphere. The reaction mixture was stirred at 60 °C for another 12 h. After cooling to the room temperature, the reaction mixture was filtered through celite and concentrated in vacuo. The residue was purified by flash column chromatography on silica gel to give the target product.

#### 5 mmol scale experiment for the preparation of 3a

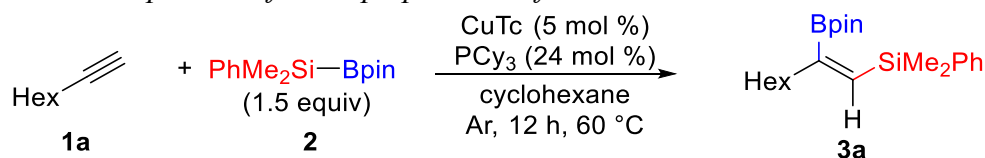

An oven-dried 100 mL Schlenk flask equipped with a magnetic stirrer was charged with  $\text{CuTc}$  (47.7 mg, 0.250 mmol, 5 mol %) and  $\text{PCy}_3$  (336.5 mg, 1.250 mmol, 24 mol %). Then, the flask was sealed with a septum and removed from glove box. The mixture in dry cyclohexane solvent (25 mL, 0.2 M) was stirred for 1 h at room temperature. Subsequently, substrate 1a (551.0 mg, 5.000 mmol, 1.0 equiv) and  $\text{Me}_2\text{PhSi-Bpin}$  (1966.7 mg, 7.500 mmol, 1.5 equiv) were added by syringe under argon atmosphere. The reaction mixture was stirred at 60 °C for another 20 h. After cooling to the room temperature, the reaction mixture was filtered through celite and concentrated in vacuo. The residue was purified by flash column chromatography (PE:EA = 99.7:0.3) on silica gel to give 3a (1.3221 g, 3.550 mmol, 71%). as colorless oil.

## B. General Procedure B:

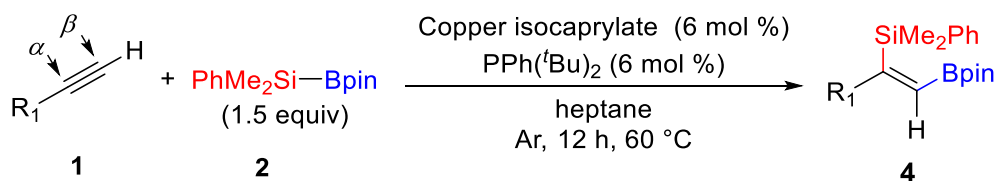

An oven-dried 10 mL Schlenk tube equipped with a magnetic stirrer was charged with copper isocaprylate (4.2 mg, 0.012 mmol, 6 mol %) and PPh(<sup>t</sup>Bu)<sub>2</sub> (2.7 mg, 0.012 mmol, 6 mol %). Then the tube was sealed with a septum and removed from glove box. The mixture in dry heptane (1 mL, 0.2 M) was stirred for 1 h. Subsequently, the alkyne (0.2 mmol, 1.0 equiv) and Me<sub>2</sub>PhSi-Bpin (78.6 mg, 0.3 mmol, 1.5 equiv) were added by syringe under argon atmosphere. The reaction mixture was stirred at 60 °C for another 12 h. After cooling to the room temperature, the reaction mixture was filtered through celite and concentrated in vacuo. The residue was purified by flash column chromatography on silica gel to give the target product.

*5 mmol scale experiment for the preparation of 4a*

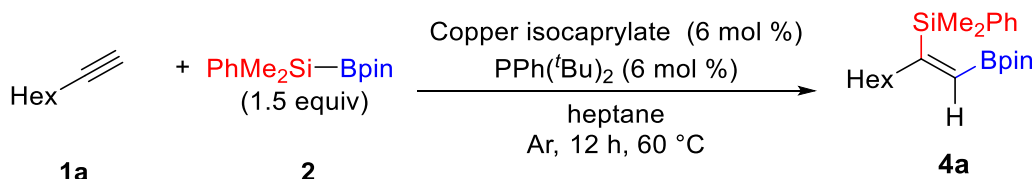

An oven-dried 100 mL Schlenk flask equipped with a magnetic stirrer was charged with copper isocaprylate (105.0 mg, 0.300 mmol, 6 mol %) and PPh(<sup>t</sup>Bu)<sub>2</sub> (66.7 mg, 0.300 mmol, 6 mol %). Then, the flask was sealed with a septum and removed from glove box. The mixture in dry heptane solvent (25 mL, 0.2 M) was stirred for 1 h at room temperature. Subsequently, substrate **1a** (551.0 mg, 5.000 mmol, 1.0 equiv) and Me<sub>2</sub>PhSi-Bpin (2622.3 mg, 10.000 mmol, 2.0 equiv) were added by syringe under argon atmosphere. The reaction mixture was stirred at 60 °C for another 20 h. After cooling to the room temperature, the reaction mixture was filtered through celite and concentrated in vacuo. The residue was purified by flash column chromatography (PE:EA = 99.7:0.3) on silica gel to give **4a** (1.3983 g, 3.754 mmol, 75%) as colorless oil.



### III. Characterization Data and Spectrum of Products

#### A. Characterization data and spectrum of products 3

##### *(E)*-dimethyl(phenyl)(2-(4,4,5,5-tetramethyl-1,3,2-dioxaborolan-2-yl)oct-1-en-1-yl)silane (**3a**).

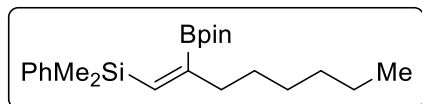

This compound was prepared by the general procedure A described above and was obtained as colorless oil in 90% yield (67.3 mg).  $R_f = 0.63$  (Petroleum ether:EtOAc = 98:2).

$^1\text{H NMR}$  (400 MHz, Chloroform- $d$ )  $\delta$  7.57 – 7.51 (m, 2H), 7.33 – 7.28 (m, 3H), 6.40 (s, 1H), 2.25 (td,  $J = 7.5, 1.4$  Hz, 2H), 1.49 – 1.35 (m, 2H), 1.32 – 1.24 (m, 6H), 1.11 (s, 12H), 0.90 – 0.85 (m, 3H), 0.39 (s, 6H).

$^{13}\text{C NMR}$  (101 MHz, Chloroform- $d$ )  $\delta$  143.83, 141.27, 133.82, 128.27, 127.43, 83.27, 41.35, 31.77, 29.45, 28.95, 24.72, 22.61, 14.09, -0.65.

$^{11}\text{B NMR}$  (128 MHz, Chloroform- $d$ )  $\delta$  29.32.

**HRMS** (ESI)  $m/z$  calculated for  $\text{C}_{22}\text{H}_{37}\text{BO}_2\text{SiNa}$   $[\text{M}+\text{Na}]^+$ : 395.2554, found: 395.2563.

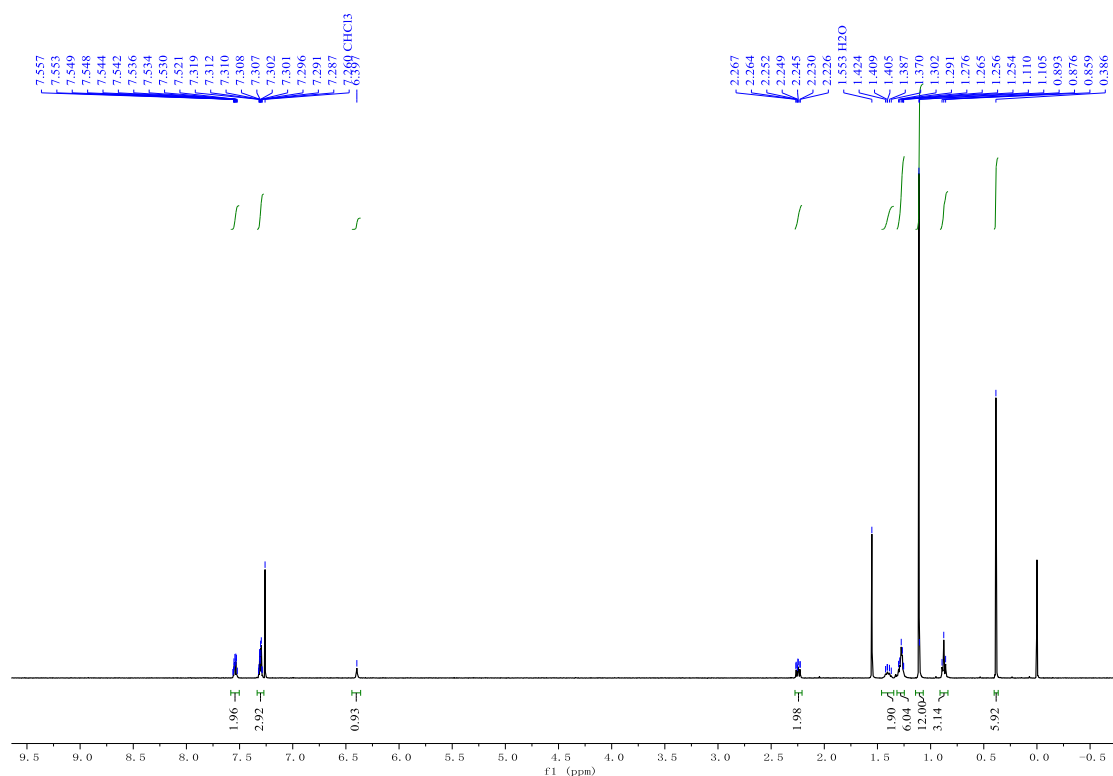

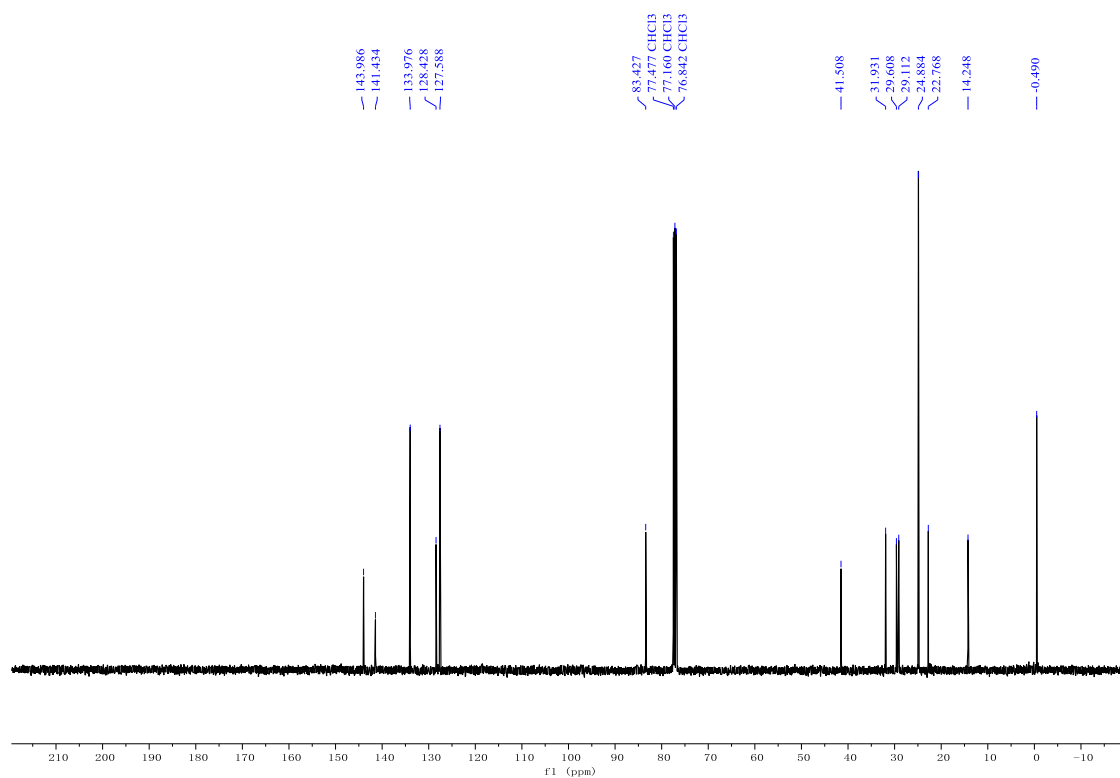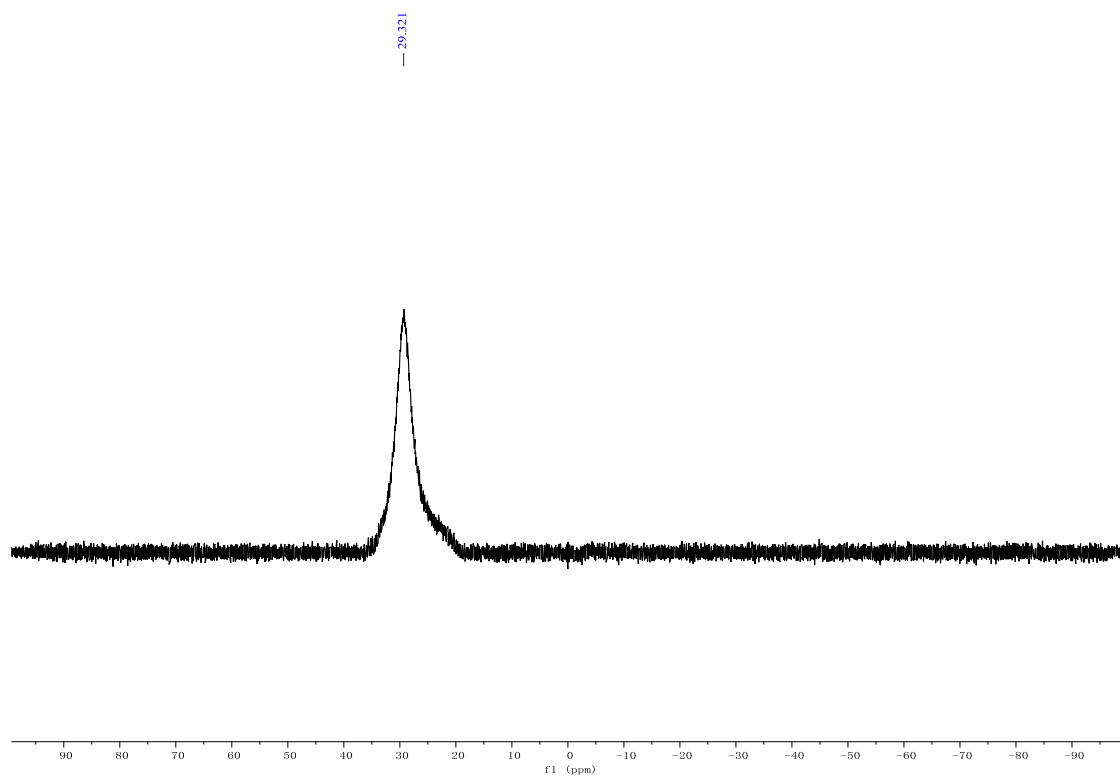

**(E)-dimethyl(phenyl)(2-(4,4,5,5-tetramethyl-1,3,2-dioxaborolan-2-yl)hex-1-en-1-yl)silane (3b).**

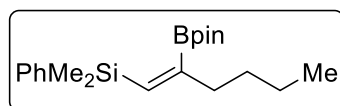

This compound was prepared by the general procedure A described above and was obtained as colorless oil in 90% yield (60.7 mg).  $R_f$  = 0.69 (Petroleum ether:EtOAc = 98:2).

**$^1\text{H}$  NMR** (400 MHz, Chloroform- $d$ )  $\delta$  7.60 – 7.50 (m, 2H), 7.35 – 7.27 (m, 3H), 6.41 (s, 1H), 2.32 – 2.19 (m, 2H), 1.47 – 1.33 (m, 2H), 1.37 – 1.27 (m, 2H), 1.12 (s, 12H), 0.90 (t,  $J$  = 7.2 Hz, 3H), 0.40 (s, 6H).

**$^{13}\text{C}$  NMR** (101 MHz, Chloroform- $d$ )  $\delta$  143.97, 141.40, 133.96, 128.43, 127.59, 83.41, 41.18, 31.91, 24.87, 22.56, 14.26, -0.49.

**$^{11}\text{B}$  NMR** (128 MHz, Chloroform- $d$ )  $\delta$  29.39.

**HRMS** (ESI)  $m/z$  calculated for  $\text{C}_{20}\text{H}_{33}\text{BO}_2\text{SiNa}$   $[\text{M}+\text{Na}]^+$ : 367.2241, found: 367.2241.

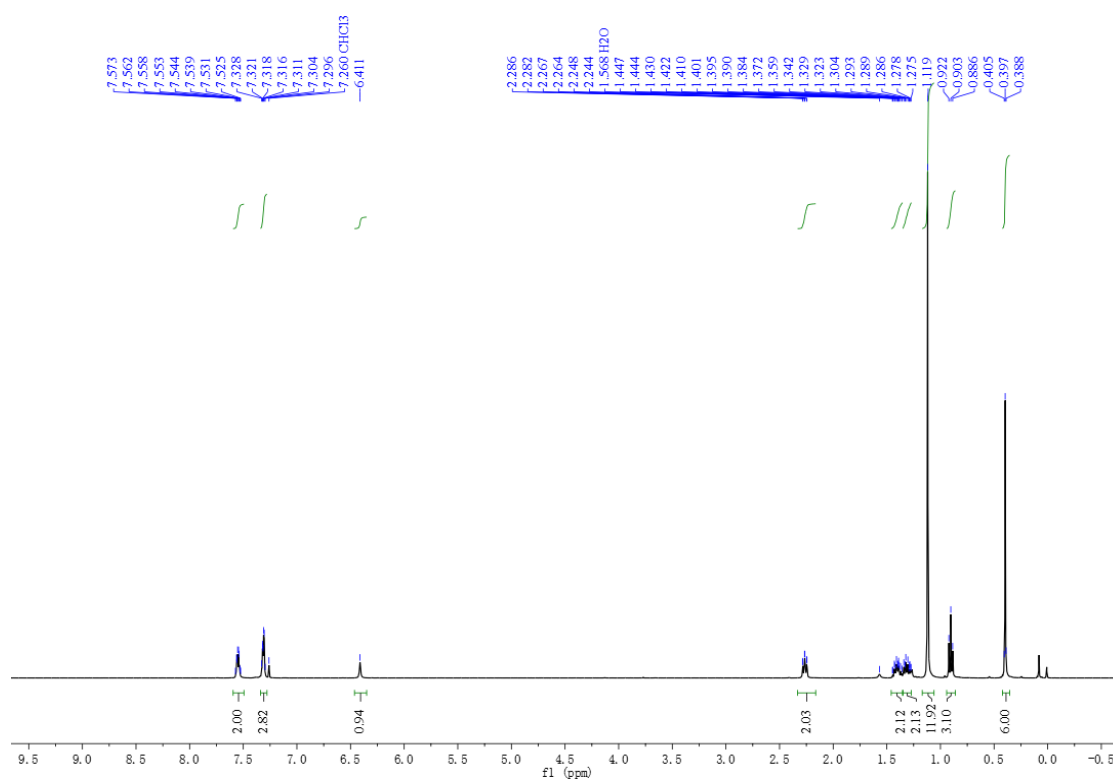

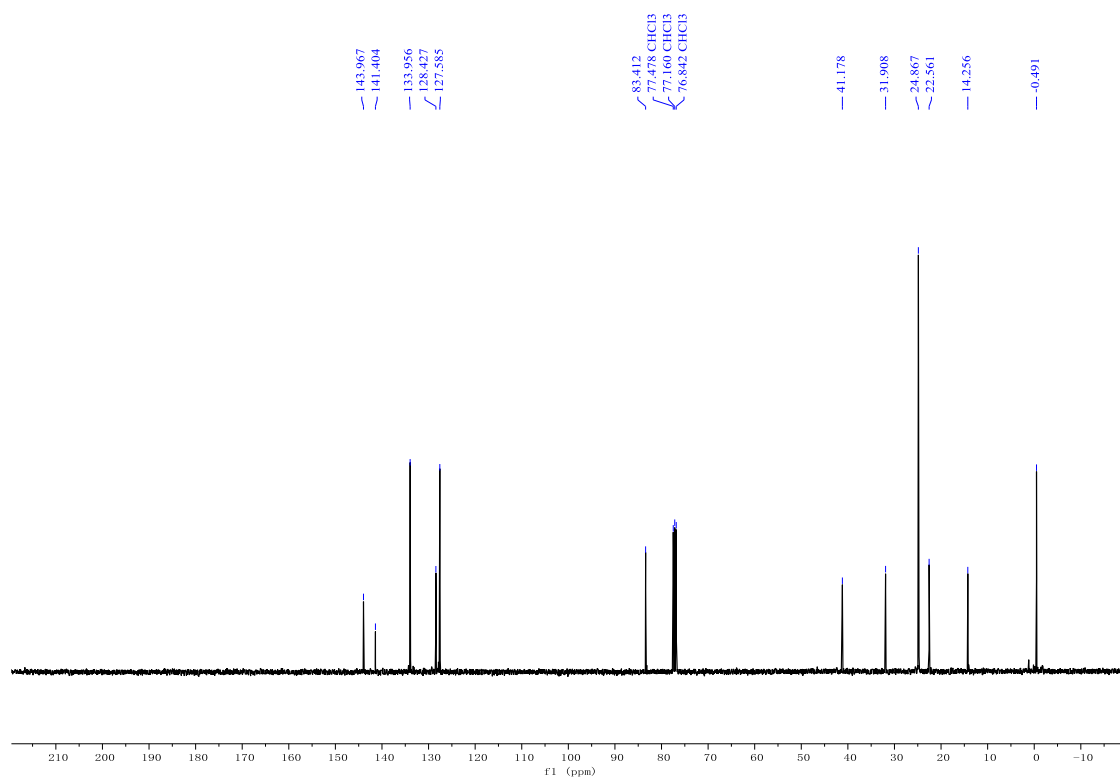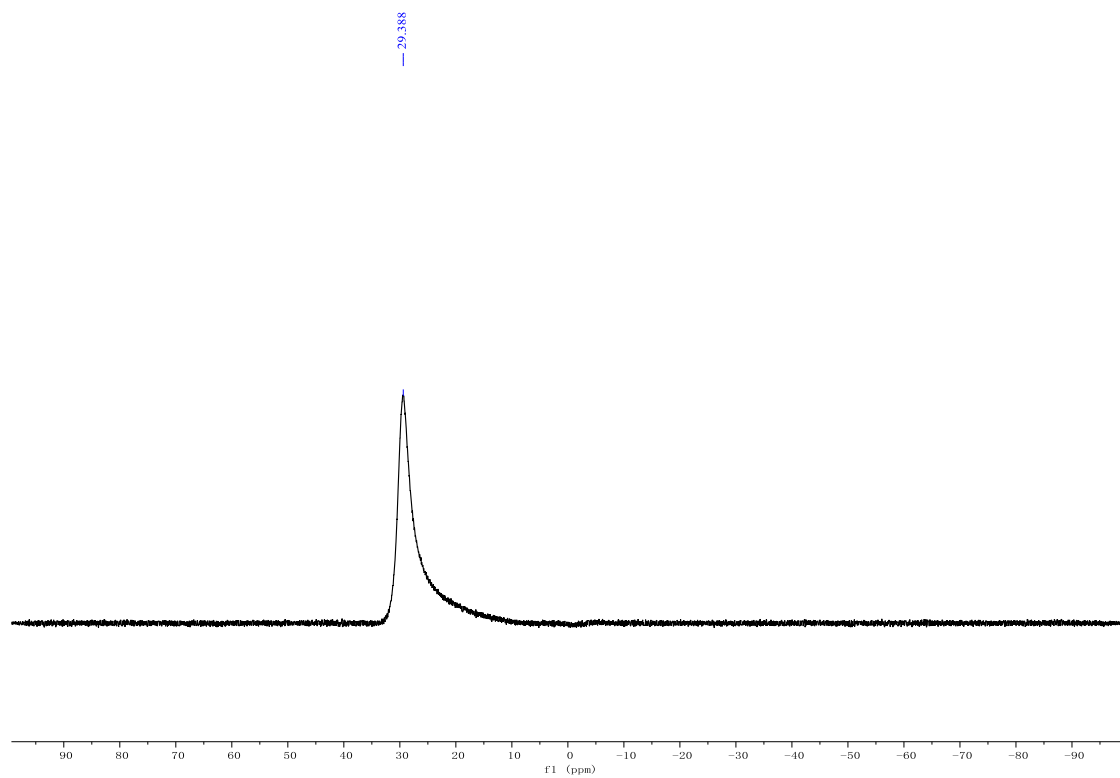

**(*E*)-(2-cyclopropyl-2-(4,4,5,5-tetramethyl-1,3,2-dioxaborolan-2-yl)vinyl)dimethyl(phenyl)silane (3d).**

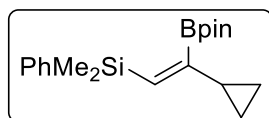

This compound was prepared by the general procedure A described above and was obtained as colorless oil in 64% yield (42.0 mg).  $R_f$  = 0.44 (Petroleum ether:EtOAc = 99:1).

**$^1\text{H}$  NMR** (400 MHz, Chloroform-*d*)  $\delta$  7.60 – 7.46 (m, 2H), 7.36 – 7.28 (m, 3H), 6.25 (s, 1H), 1.67 (ttd,  $J$  = 8.3, 5.2, 0.8 Hz, 1H), 1.12 (s, 12H), 0.77 – 0.68 (m, 2H), 0.65 (qd,  $J$  = 4.8, 2.0 Hz, 2H), 0.39 (s, 6H).

**$^{13}\text{C}$  NMR** (101 MHz, Chloroform-*d*)  $\delta$  141.33, 138.40, 133.96, 128.46, 127.61, 83.54, 24.94, 19.91, 8.48, -0.37.

**$^{11}\text{B}$  NMR** (128 MHz, Chloroform-*d*)  $\delta$  29.57.

**HRMS** (ESI)  $m/z$  calculated for  $\text{C}_{19}\text{H}_{29}\text{BO}_2\text{SiNa}$   $[\text{M}+\text{Na}]^+$ : 351.1928, found: 351.1929.

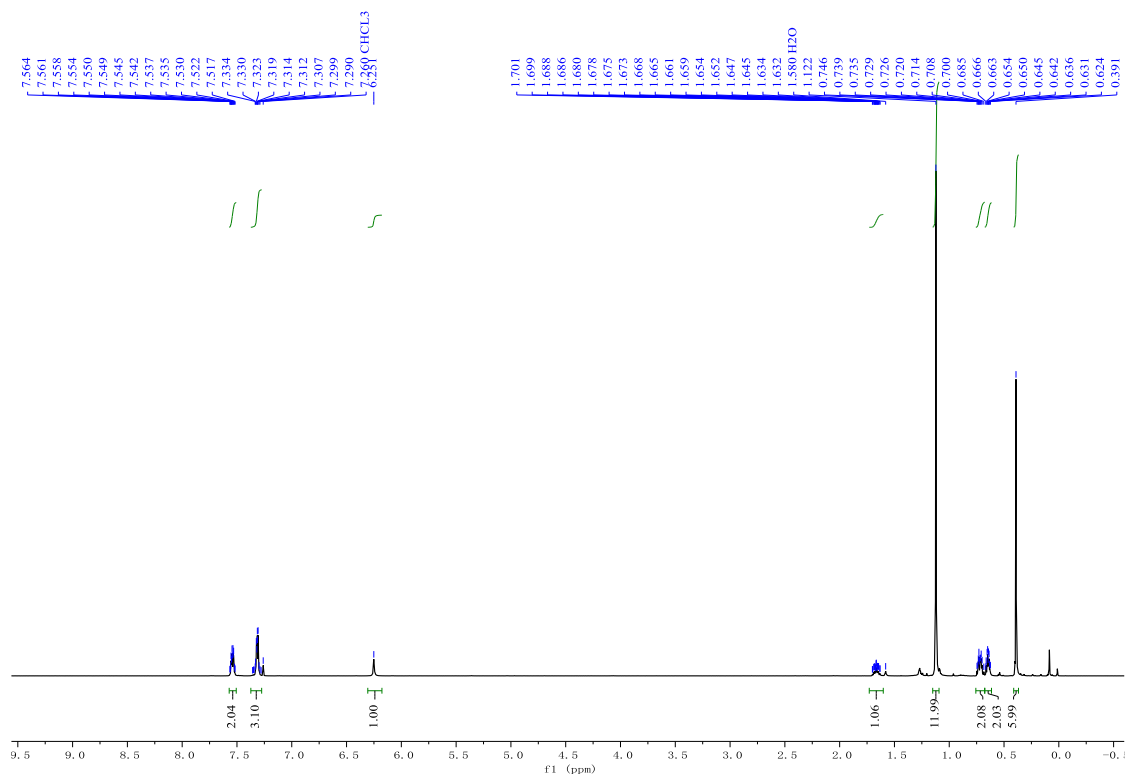

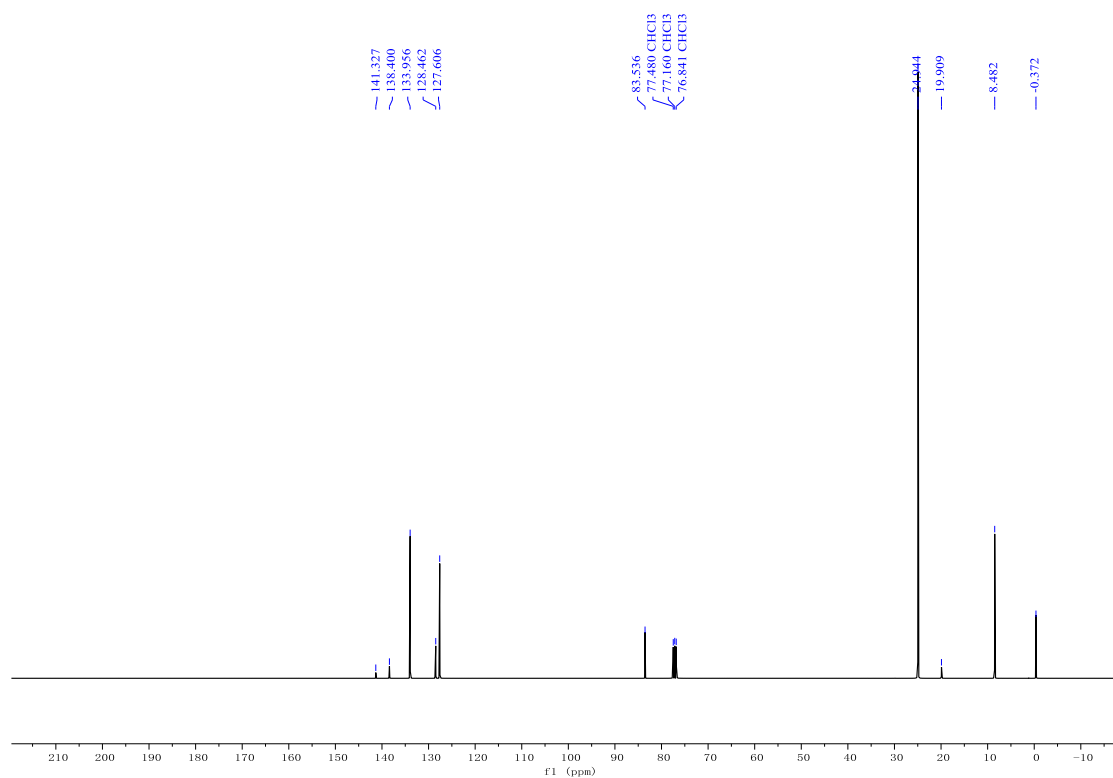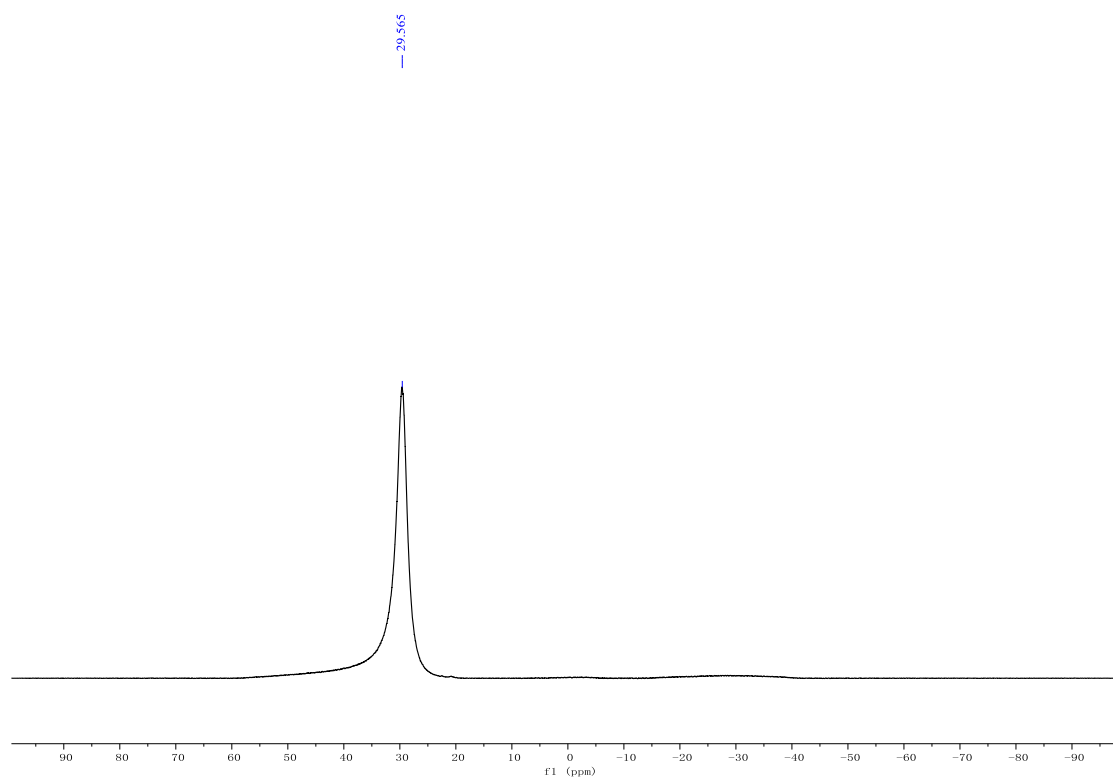

**(*E*)-dimethyl(phenyl)(5-phenyl-2-(4,4,5,5-tetramethyl-1,3,2-dioxaborolan-2-yl)pent-1-en-1-yl)silane (3e).**

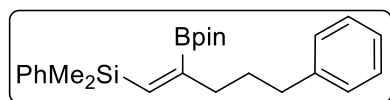

This compound was prepared by the general procedure A described above and was obtained as colorless oil in 80% yield (76.1 mg).  $R_f = 0.46$  (Petroleum ether:EtOAc = 99:1).

$^1\text{H}$  NMR (400 MHz, Chloroform-*d*)  $\delta$  7.59 – 7.49 (m, 2H), 7.35 – 7.25 (m, 3H), 7.29 – 7.22 (m, 2H), 7.21 – 7.12 (m, 3H), 6.43 (s, 1H), 2.64 – 2.56 (m, 2H), 2.32 (td,  $J = 7.5, 1.4$  Hz, 2H), 1.81 – 1.71 (m, 2H), 1.11 (s, 12H), 0.39 (s, 6H).

$^{13}\text{C}$  NMR (101 MHz, Chloroform-*d*)  $\delta$  144.92, 143.02, 141.28, 133.94, 128.58, 128.46, 128.34, 127.60, 83.48, 41.16, 35.75, 31.49, 24.88, -0.52.

$^{11}\text{B}$  NMR (128 MHz, Chloroform-*d*)  $\delta$  29.85.

HRMS (ESI)  $m/z$  calculated for  $\text{C}_{25}\text{H}_{35}\text{BO}_2\text{SiNa}$   $[\text{M}+\text{Na}]^+$ : 429.2397, found: 429.2404.

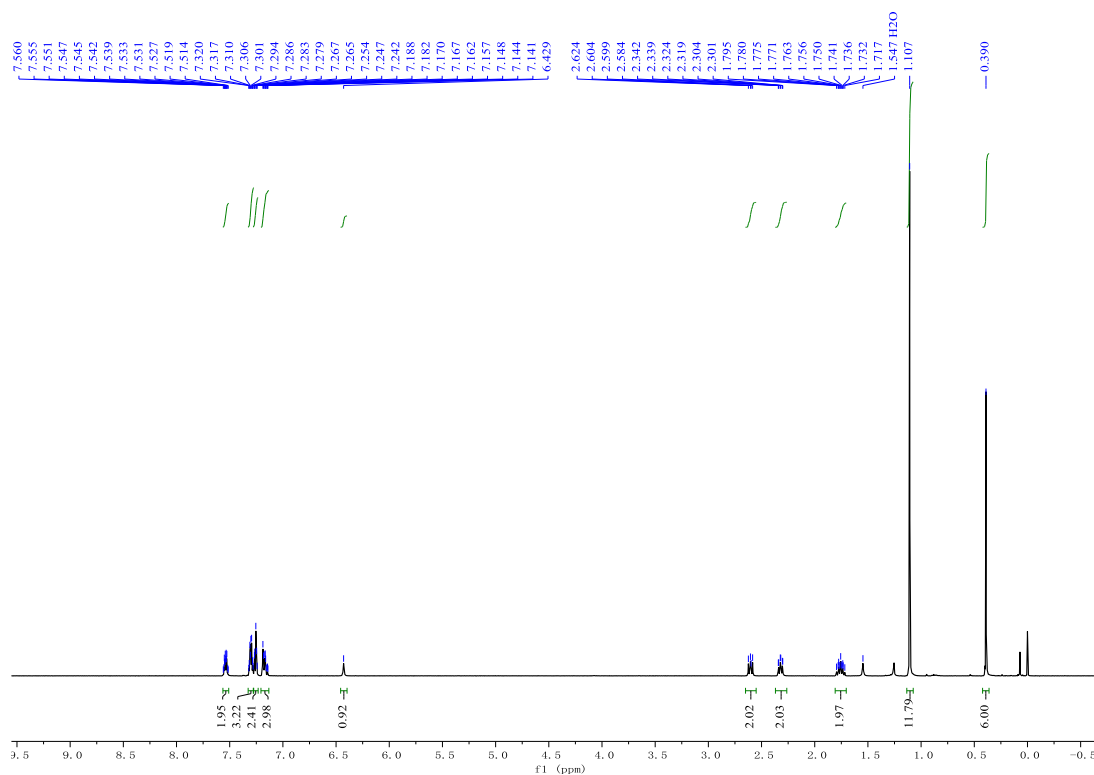

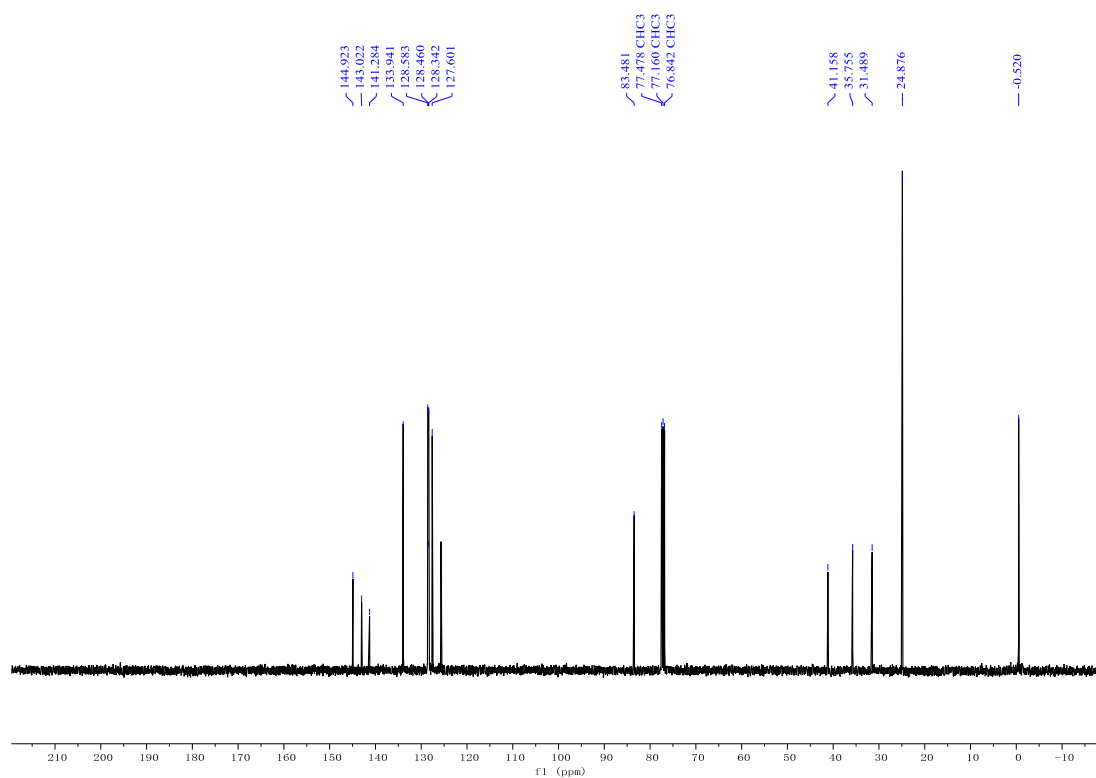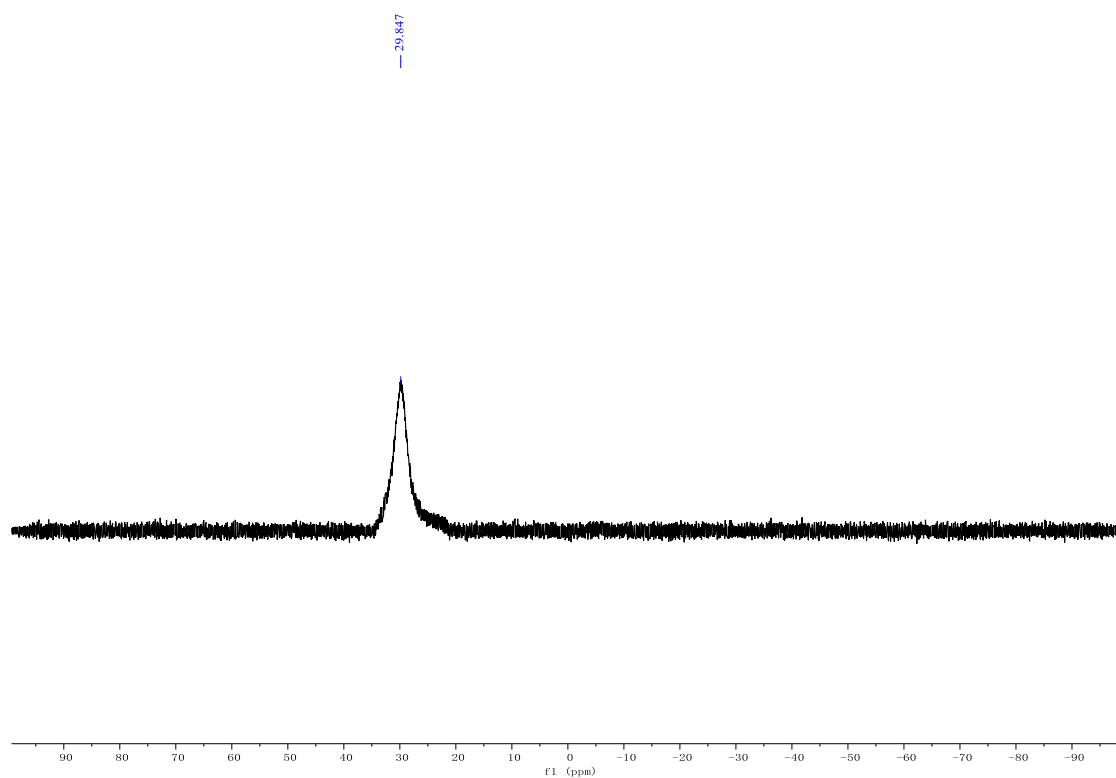



**(*E*)-5-(dimethyl(phenyl)silyl)-4-(4,4,5,5-tetramethyl-1,3,2-dioxaborolan-2-yl)pent-4-en-1-yl acetate (3f).**

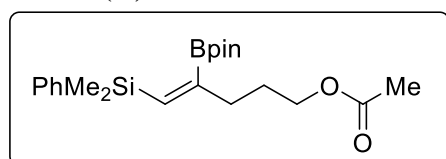

This compound was prepared by the general procedure A described above and was obtained as colorless oil in 60% yield (46.9 mg).  $R_f = 0.20$  (Petroleum ether:EtOAc = 98:2).

**$^1\text{H}$  NMR** (400 MHz, Chloroform-*d*)  $\delta$  7.58 – 7.48 (m, 2H), 7.33 – 7.29 (m, 3H), 6.46 (s, 1H), 4.06 (t,  $J = 6.7$  Hz, 2H), 2.32 (ddd,  $J = 7.6, 6.8, 1.4$  Hz, 2H), 2.04 (s, 3H), 1.77 (ddt,  $J = 9.3, 7.5, 6.7$  Hz, 2H), 1.11 (s, 12H), 0.39 (s, 6H).

**$^{13}\text{C}$  NMR** (101 MHz, Chloroform-*d*)  $\delta$  171.33, 145.82, 141.16, 128.51, 127.63, 83.59, 64.45, 37.52, 28.46, 24.86, 21.19, -0.60.

**$^{11}\text{B}$  NMR** (128 MHz, Chloroform-*d*)  $\delta$  33.36.

**HRMS** (ESI)  $m/z$  calculated for  $\text{C}_{21}\text{H}_{33}\text{BO}_4\text{SiNa}$   $[\text{M}+\text{Na}]^+$ : 411.2139, found: 411.2142.

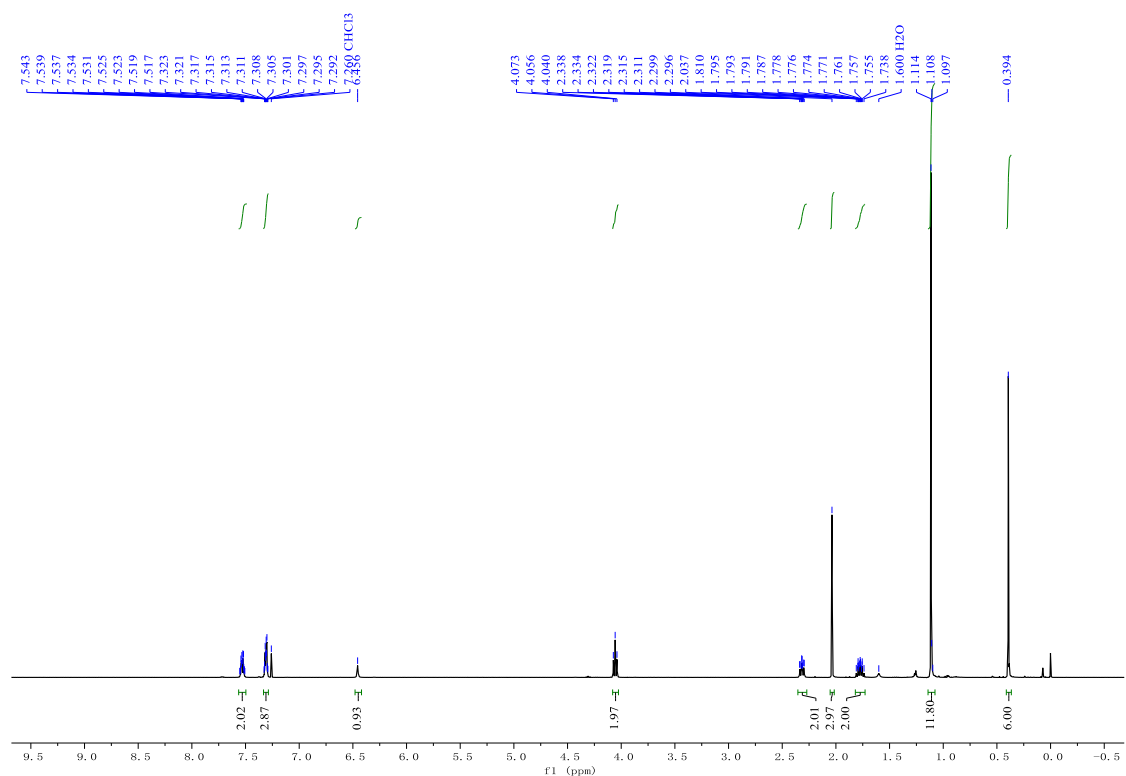

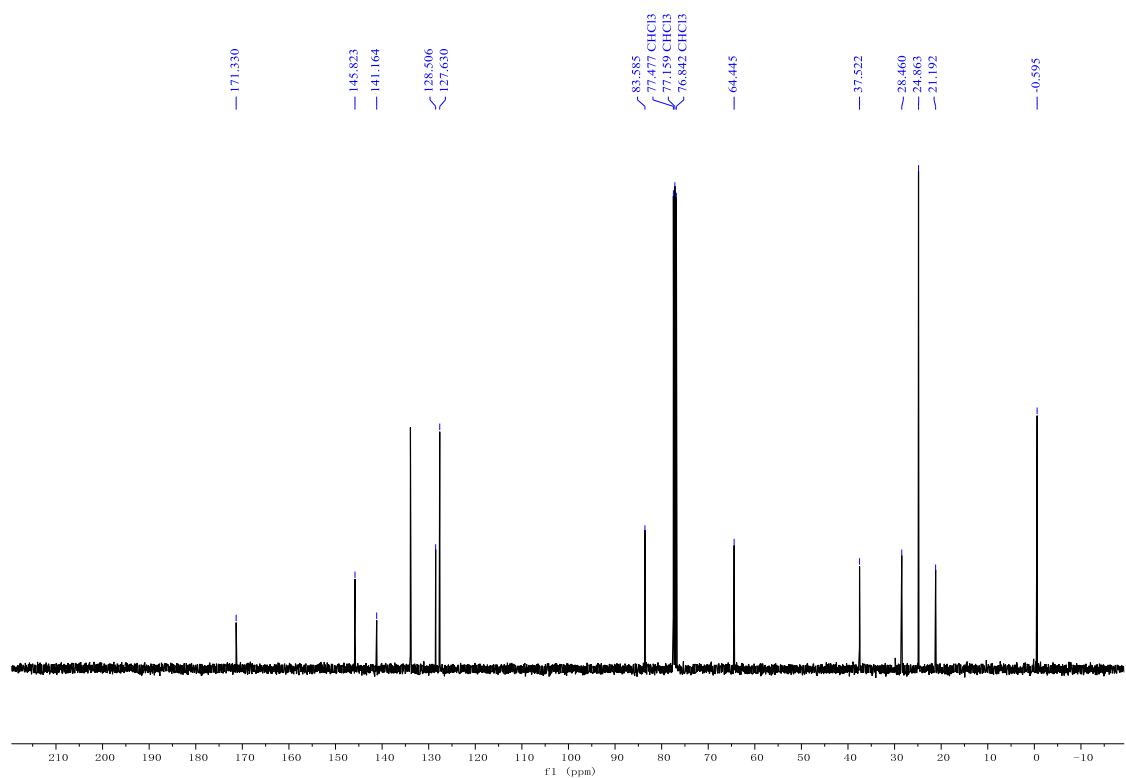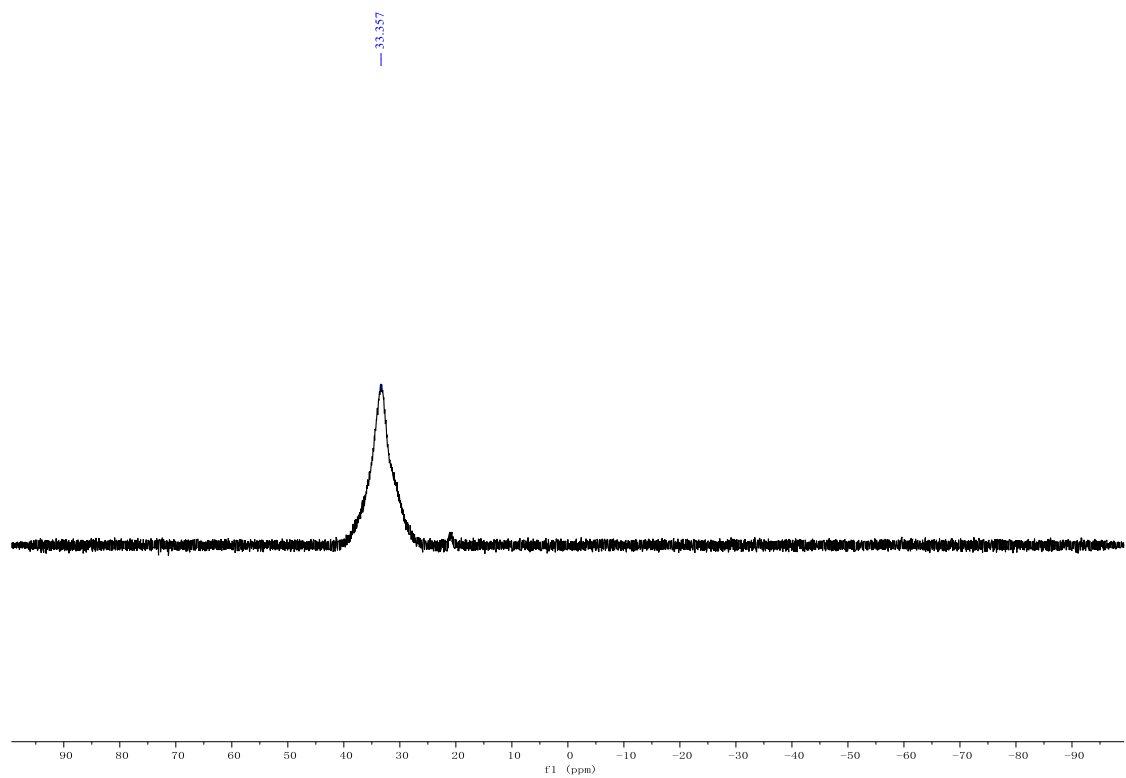

methyl (*E*)-6-(dimethyl(phenyl)silyl)-5-(4,4,5,5-tetramethyl-1,3,2-dioxaborolan-2-yl)hex-5-enoate (**3g**).

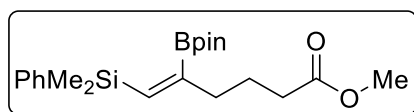

This compound was prepared by the general procedure A described above and was obtained as colorless oil in 63% yield (48.9 mg).  $R_f = 0.46$  (Petroleum ether:EtOAc = 98:2).

$^1\text{H NMR}$  (400 MHz, Chloroform-*d*)  $\delta$  7.57 – 7.51 (m, 2H), 7.34 – 7.29 (m, 3H), 6.45 (s, 1H), 3.66 (s, 3H), 2.36 – 2.24 (m, 4H), 1.78 (p,  $J = 7.6$  Hz, 2H), 1.12 (s, 12H), 0.40 (s, 6H).

$^{13}\text{C NMR}$  (101 MHz, Chloroform-*d*)  $\delta$  174.39, 145.96, 141.17, 133.91, 128.48, 127.61, 83.54, 51.55, 40.59, 33.72, 24.85, 24.76, -0.58.

$^{11}\text{B NMR}$  (128 MHz, Chloroform-*d*)  $\delta$  29.05.

**HRMS** (ESI)  $m/z$  calculated for  $\text{C}_{21}\text{H}_{33}\text{BO}_4\text{SiNa}$   $[\text{M}+\text{Na}]^+$ : 411.2139, found: 411.2141.

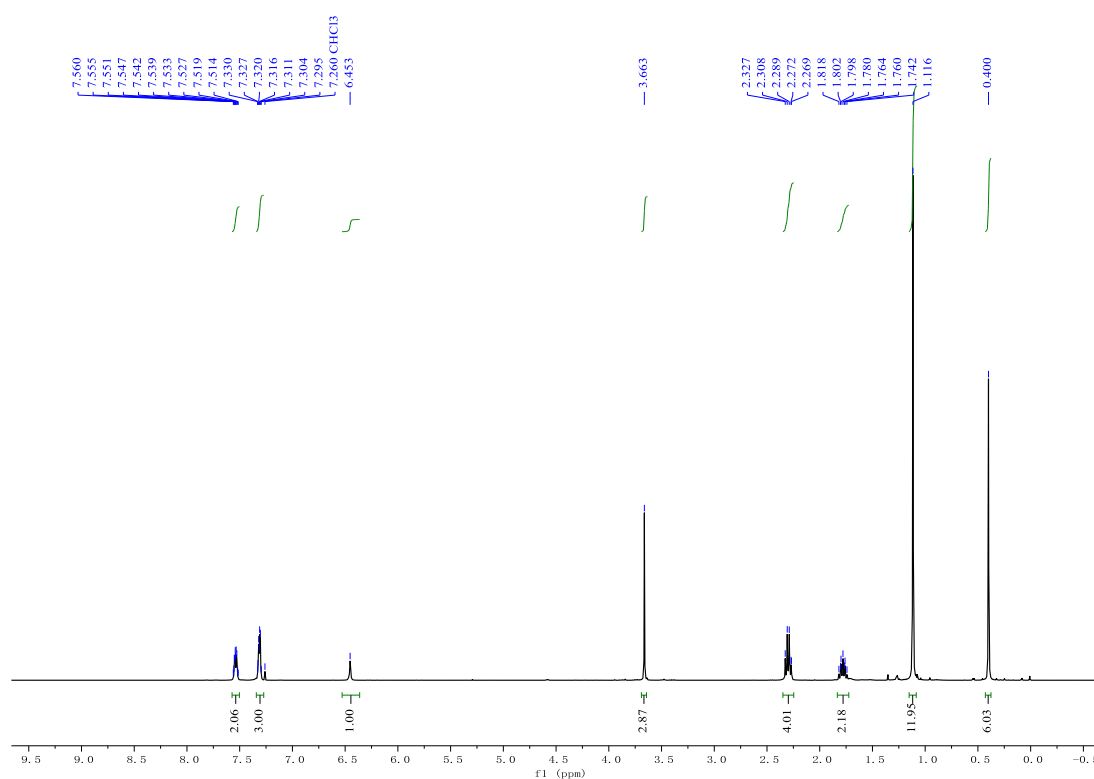

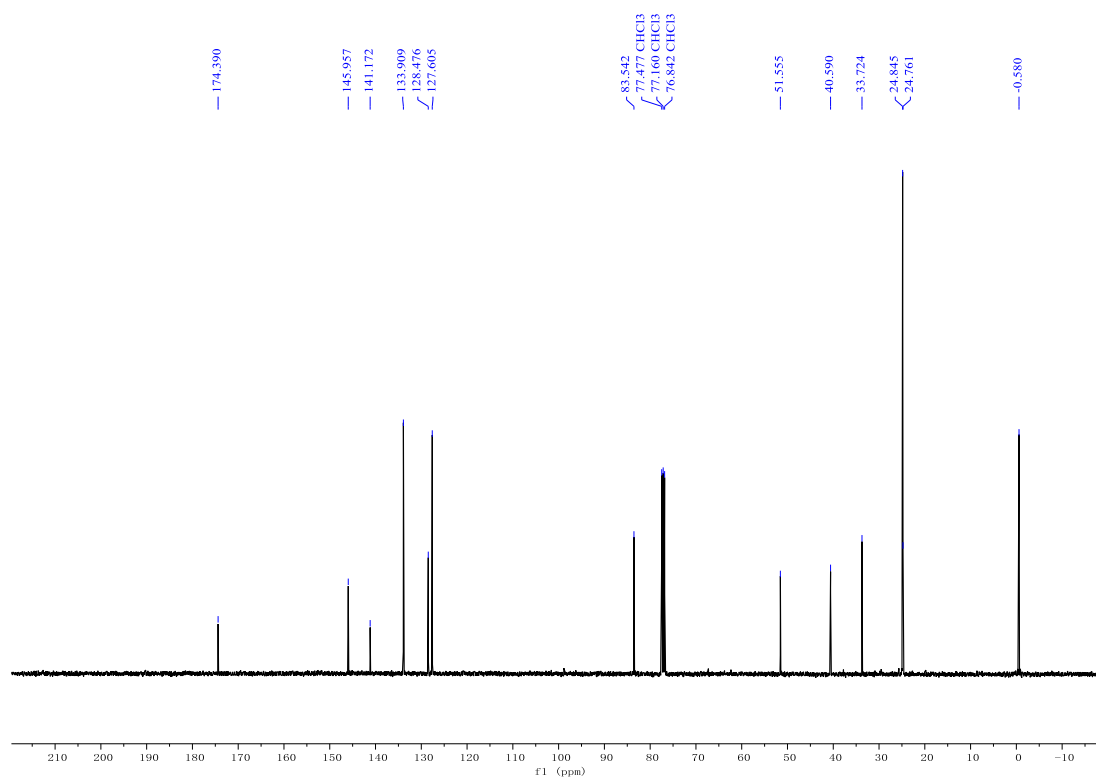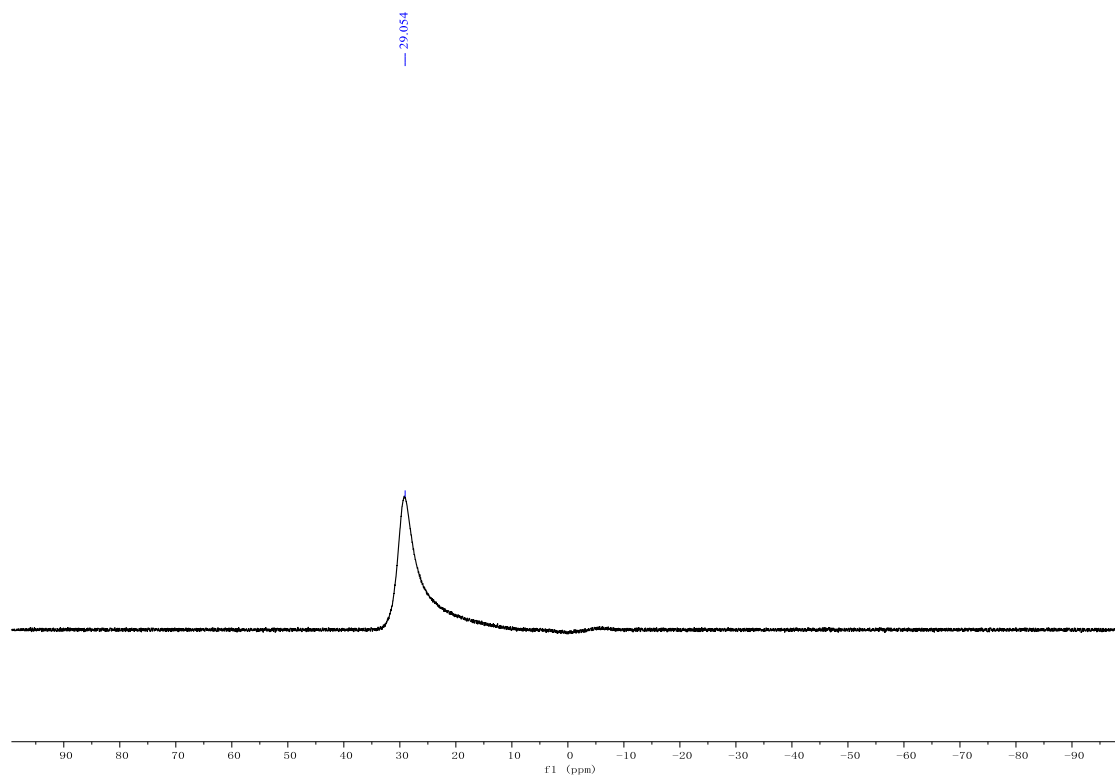

**(*E*)-5-(dimethyl(phenyl)silyl)-1-phenyl-4-(4,4,5,5-tetramethyl-1,3,2-dioxaborolan-2-yl)pent-4-en-1-one (3h).**

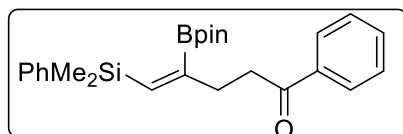

This compound was prepared by the general procedure A described above and was obtained as colorless oil in 55% yield (41.7 mg).  $R_f = 0.50$  (Petroleum ether:EtOAc = 95:5).

**$^1\text{H}$  NMR** (400 MHz, Chloroform-*d*)  $\delta$  8.04 – 7.98 (m, 2H), 7.58 – 7.42 (m, 5H), 7.35 – 7.28 (m, 3H), 6.53 (t,  $J = 1.5$  Hz, 1H), 3.17 – 3.04 (m, 2H), 2.68 (ddd,  $J = 9.4, 6.1, 1.4$  Hz, 2H), 1.14 (s, 12H), 0.40 (s, 6H).

**$^{13}\text{C}$  NMR** (101 MHz, Chloroform-*d*)  $\delta$  200.51, 146.50, 141.04, 137.22, 133.90, 132.92, 128.62, 128.49, 128.39, 127.61, 83.65, 39.05, 36.61, 24.89, -0.63.

**$^{11}\text{B}$  NMR** (128 MHz, Chloroform-*d*)  $\delta$  29.76.

**HRMS** (ESI)  $m/z$  calculated for  $\text{C}_{25}\text{H}_{33}\text{BO}_3\text{SiNa}$   $[\text{M}+\text{Na}]^+$ : 443.2190, found: 443.2184.

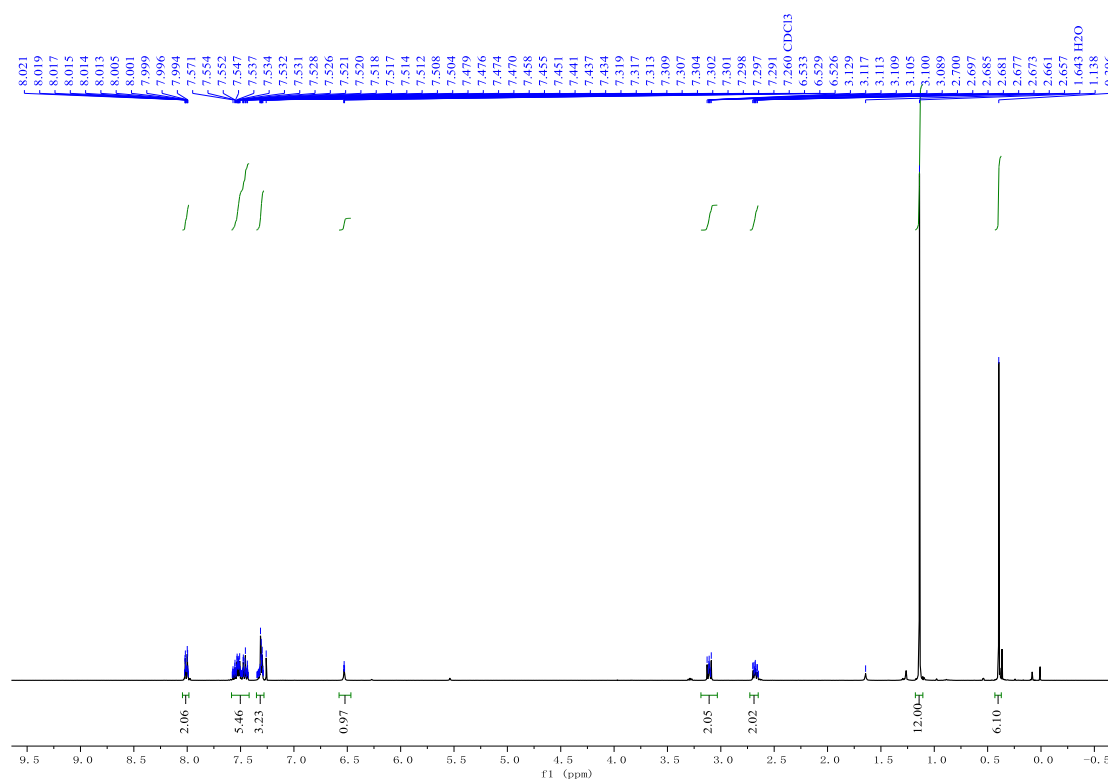

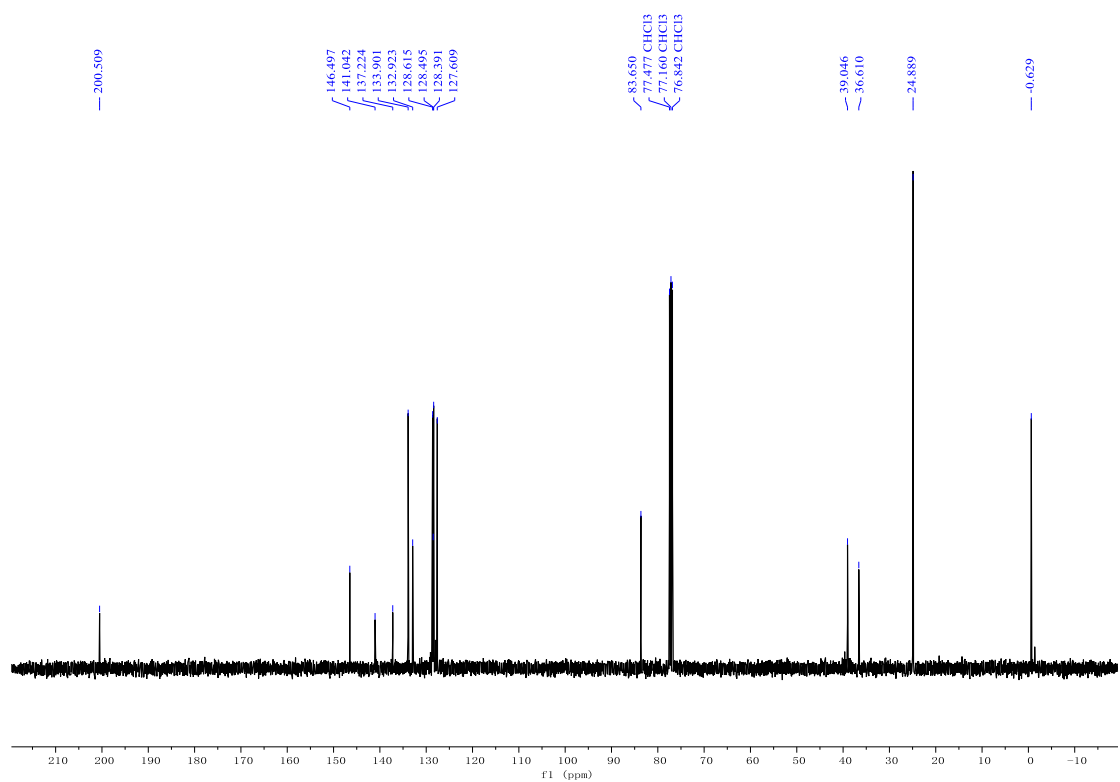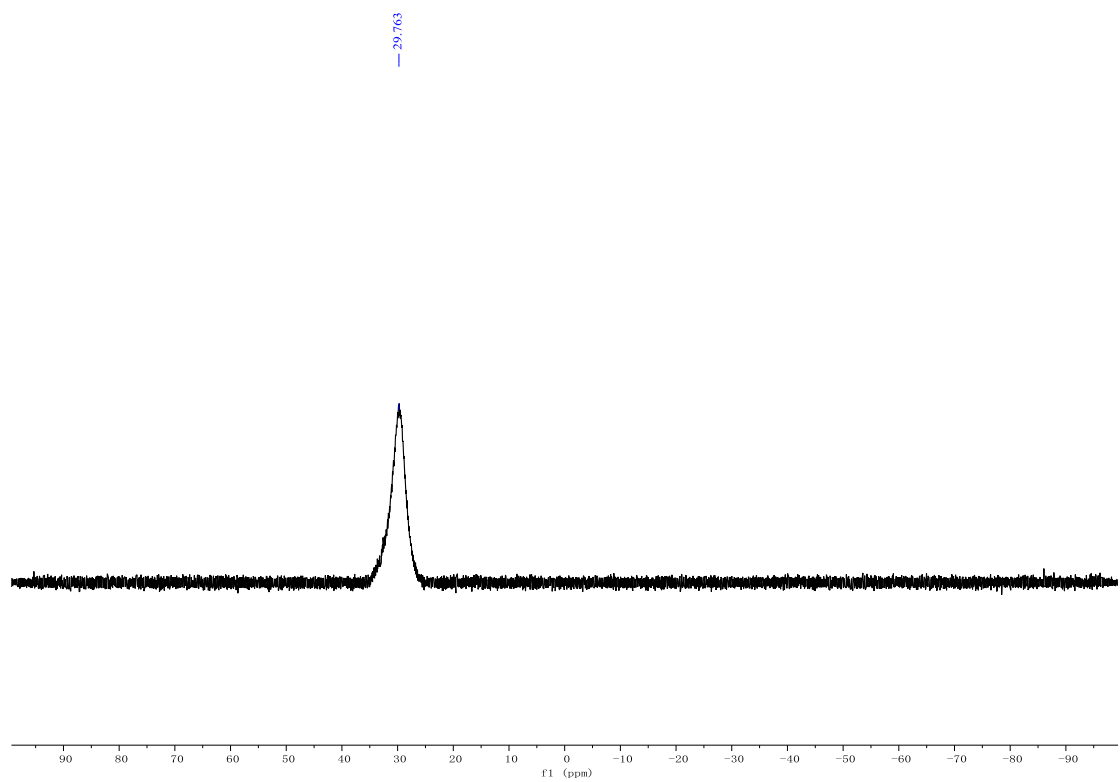

**(*E*)-tert-butyl((5-(dimethyl(phenyl)silyl)-4-(4,4,5,5-tetramethyl-1,3,2-dioxaborolan-2-yl)pent-4-en-1-yl)oxy)dimethylsilane (3i).**

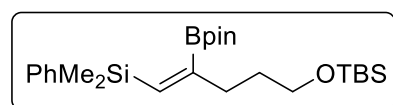

This compound was prepared by the general procedure A described above and was obtained as colorless oil in 64% yield (42.0 mg).  $R_f = 0.26$  (Petroleum ether:EtOAc = 99:1).

**$^1\text{H}$  NMR** (400 MHz, Chloroform-*d*)  $\delta$  7.60 – 7.49 (m, 2H), 7.36 – 7.27 (m, 3H), 6.45 (s, 1H), 3.61 (t,  $J = 6.8$  Hz, 2H), 2.34 – 2.26 (m, 2H), 1.74 – 1.61 (m, 2H), 1.12 (s, 12H), 0.91 (s, 9H), 0.40 (s, 6H), 0.06 (s, 6H).

**$^{13}\text{C}$  NMR** (101 MHz, Chloroform-*d*)  $\delta$  144.85, 133.96, 128.45, 127.60, 83.48, 63.10, 37.59, 32.76, 26.18, 24.89, 18.55, -0.53, -5.06.

**$^{11}\text{B}$  NMR** (128 MHz, Chloroform-*d*)  $\delta$  29.80.

**HRMS** (ESI)  $m/z$  calculated for  $\text{C}_{25}\text{H}_{45}\text{BO}_3\text{Si}_2\text{Na}$   $[\text{M}+\text{Na}]^+$ : 483.2898, found: 483.2903.

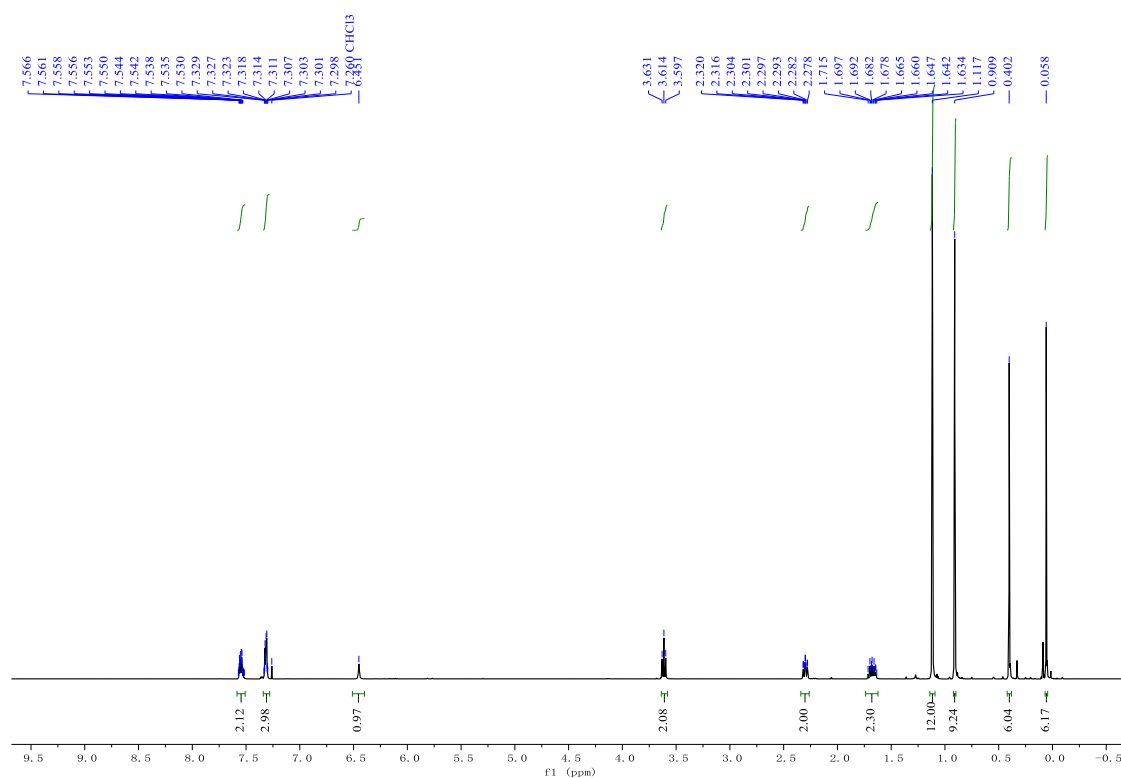

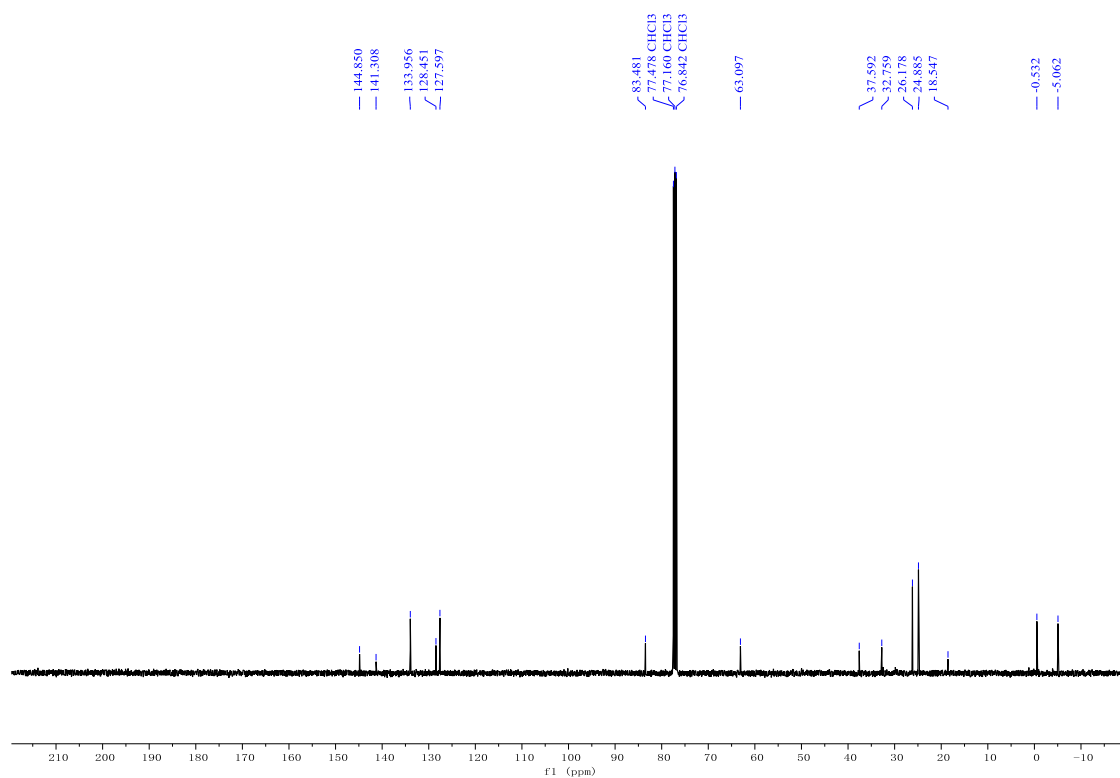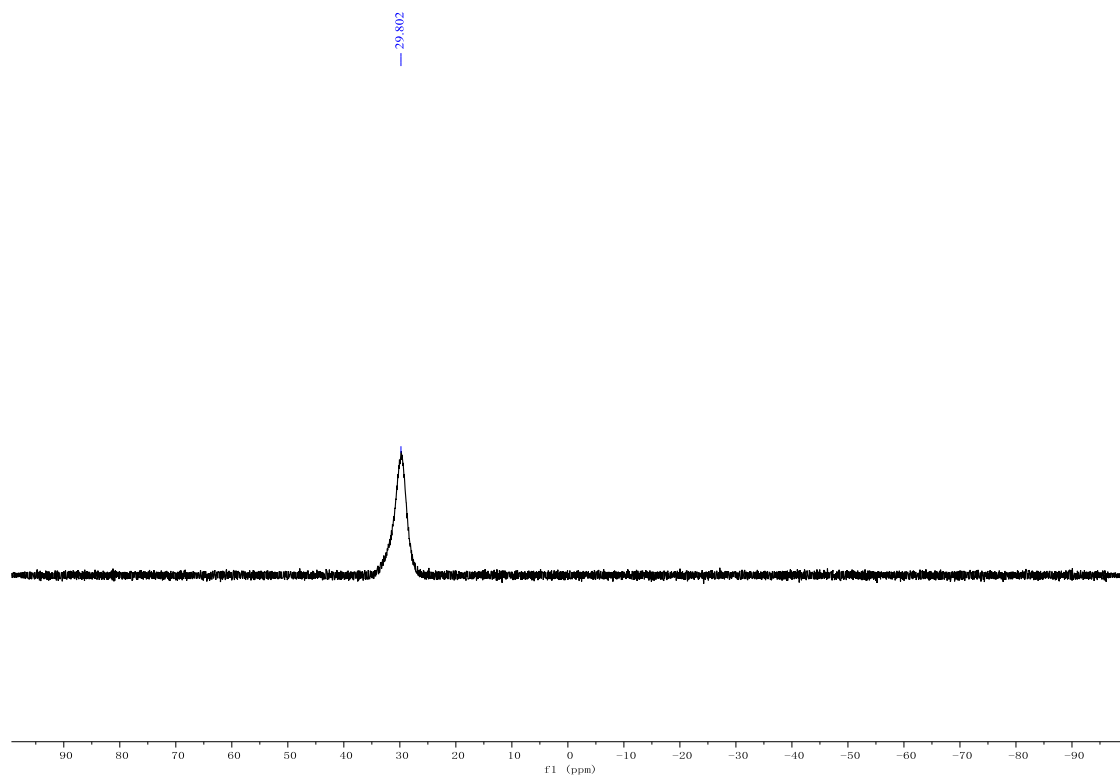



CC(C)(C)C(=C)Si(C)(C)c1ccccc1OCC2=CC=CC=C2

**<sup>1</sup>H NMR** (400 MHz, Chloroform-*d*)  $\delta$  7.62 – 7.51 (m, 2H), 7.42 – 7.27 (m, 8H), 6.49 (s, 1H), 4.52 (s, 2H), 3.50 (t,  $J$  = 6.8 Hz, 2H), 2.40 – 2.31 (m, 2H), 1.80 (dq,  $J$  = 9.3, 6.8 Hz, 2H), 1.13 (s, 12H), 0.42 (s, 6H).

**<sup>11</sup>B NMR** (128 MHz, Chloroform-*d*)  $\delta$  30.22.

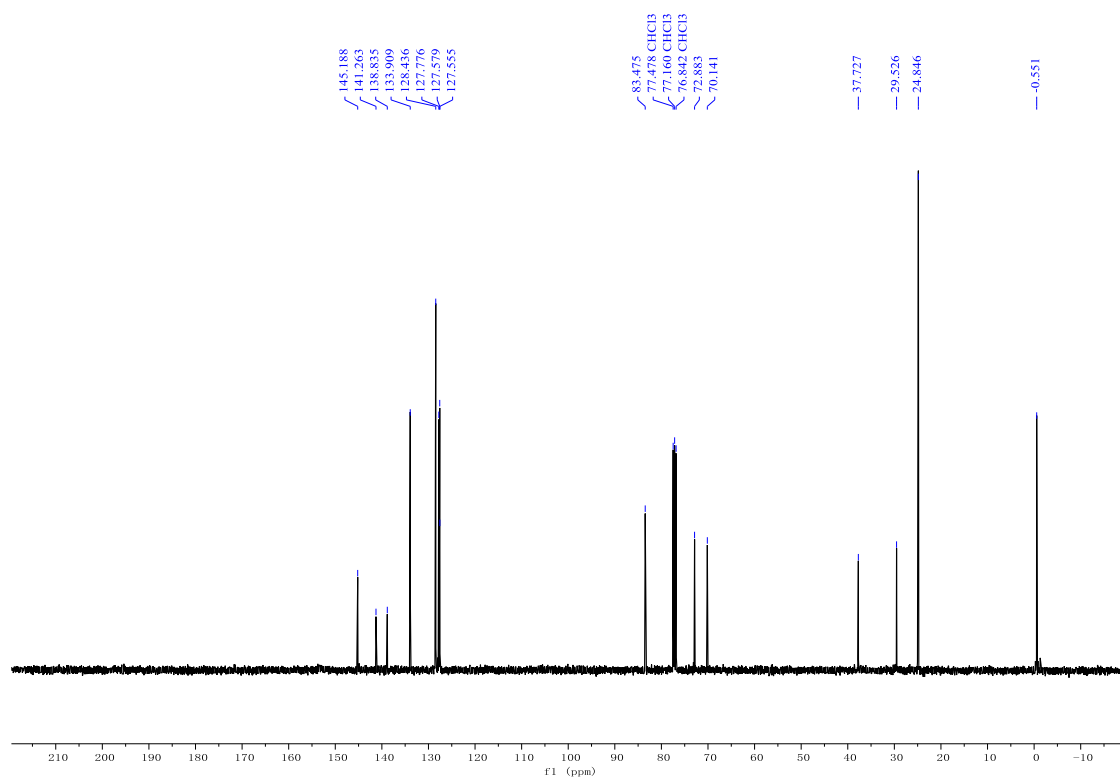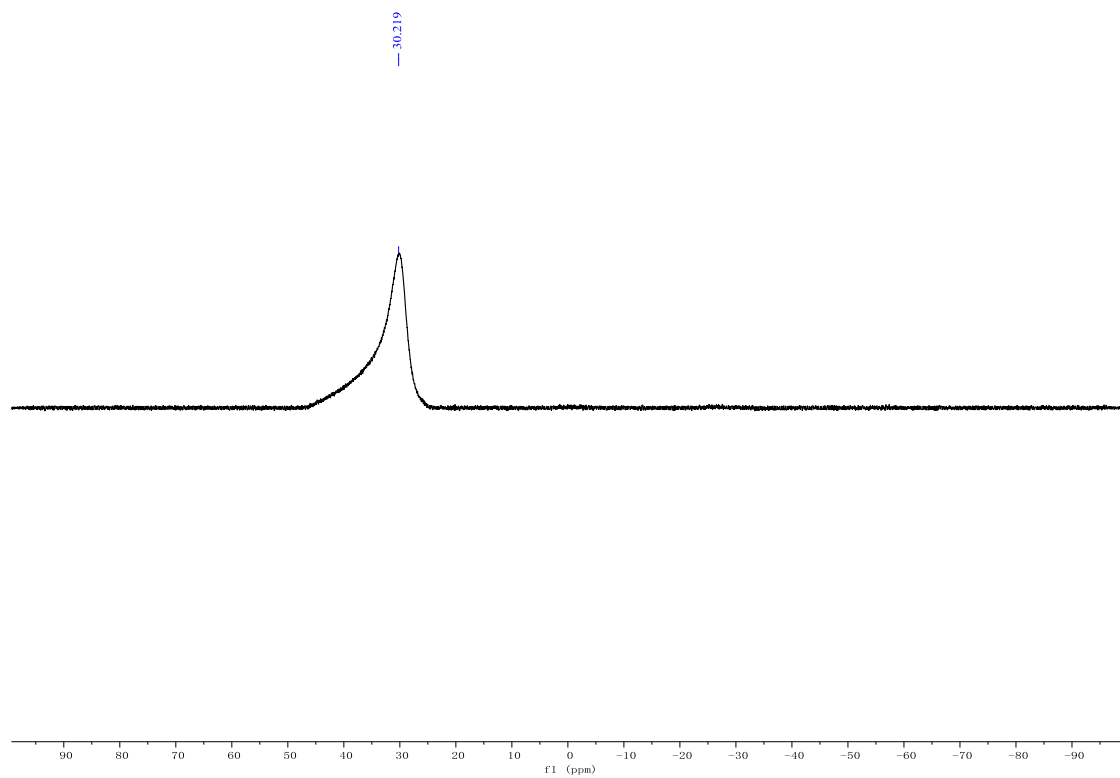

**(*E*)-dimethyl(phenyl)(5-(((tetrahydro-2*H*-pyran-2-yl)oxy)-2-(4,4,5,5-tetramethyl-1,3,2-dioxaborolan-2-yl)pent-1-en-1-yl)silane (3k).**

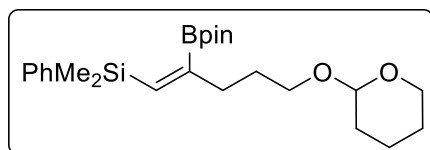

This compound was prepared by the general procedure A described above and was obtained as colorless oil in 75% yield (64.6 mg).  $R_f$  = 0.25 (Petroleum ether:EtOAc = 99:1).

$^1\text{H NMR}$  (400 MHz, Chloroform-*d*)  $\delta$  7.59 – 7.49 (m, 2H), 7.35 – 7.26 (m, 3H), 6.47 (s, 1H), 4.58 (dd,  $J$  = 4.4, 2.9 Hz, 1H), 3.87 (ddd,  $J$  = 11.1, 7.8, 3.1 Hz, 1H), 3.74 (dt,  $J$  = 9.6, 6.9 Hz, 1H), 3.54 – 3.44 (m, 1H), 3.39 (dt,  $J$  = 9.7, 6.8 Hz, 1H), 2.33 (tdd,  $J$  = 7.1, 2.9, 1.5 Hz, 2H), 1.91 – 1.65 (m, 4H), 1.65 – 1.44 (m, 4H), 1.11 (s, 12H), 0.40 (s, 6H).

$^{13}\text{C NMR}$  (101 MHz, Chloroform-*d*)  $\delta$  145.09, 141.25, 133.90, 128.42, 127.56, 98.83, 83.45, 67.25, 62.33, 37.76, 30.87, 29.53, 25.64, 24.84, 19.75, -0.56.

$^{11}\text{B NMR}$  (128 MHz, Chloroform-*d*)  $\delta$  29.13.

**HRMS** (ESI)  $m/z$  calculated for  $\text{C}_{24}\text{H}_{39}\text{BO}_4\text{SiNa}$   $[\text{M}+\text{Na}]^+$ : 453.2608, found: 453.2617.

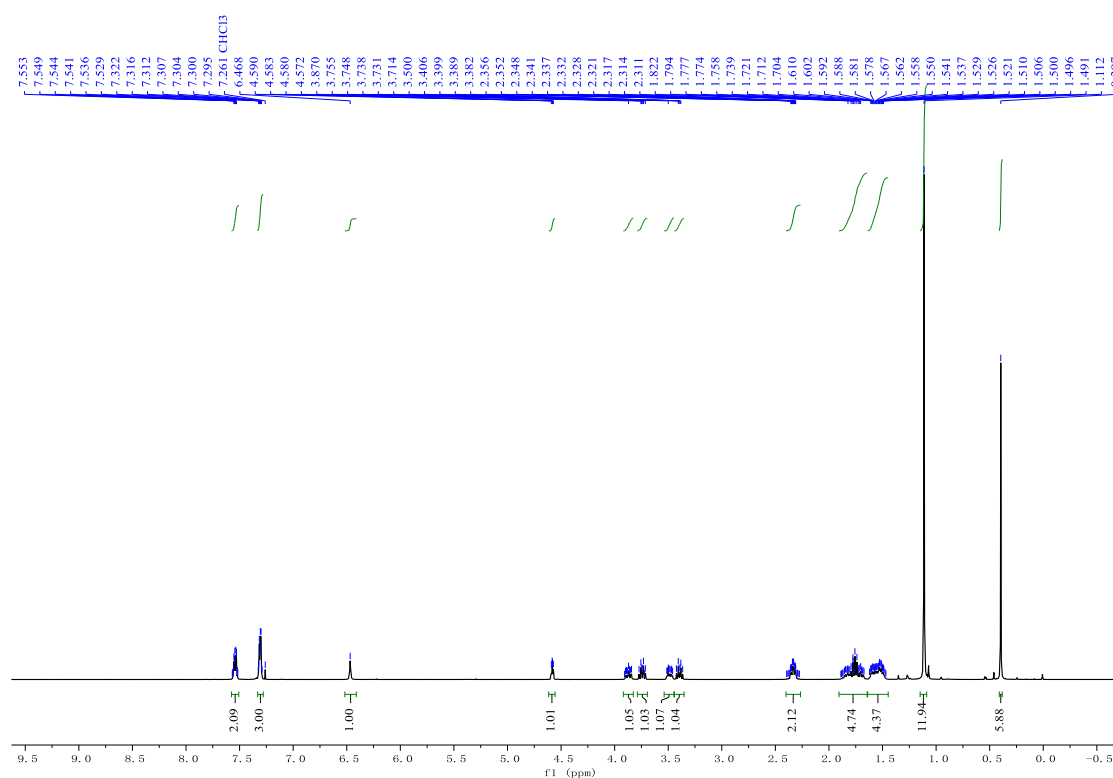

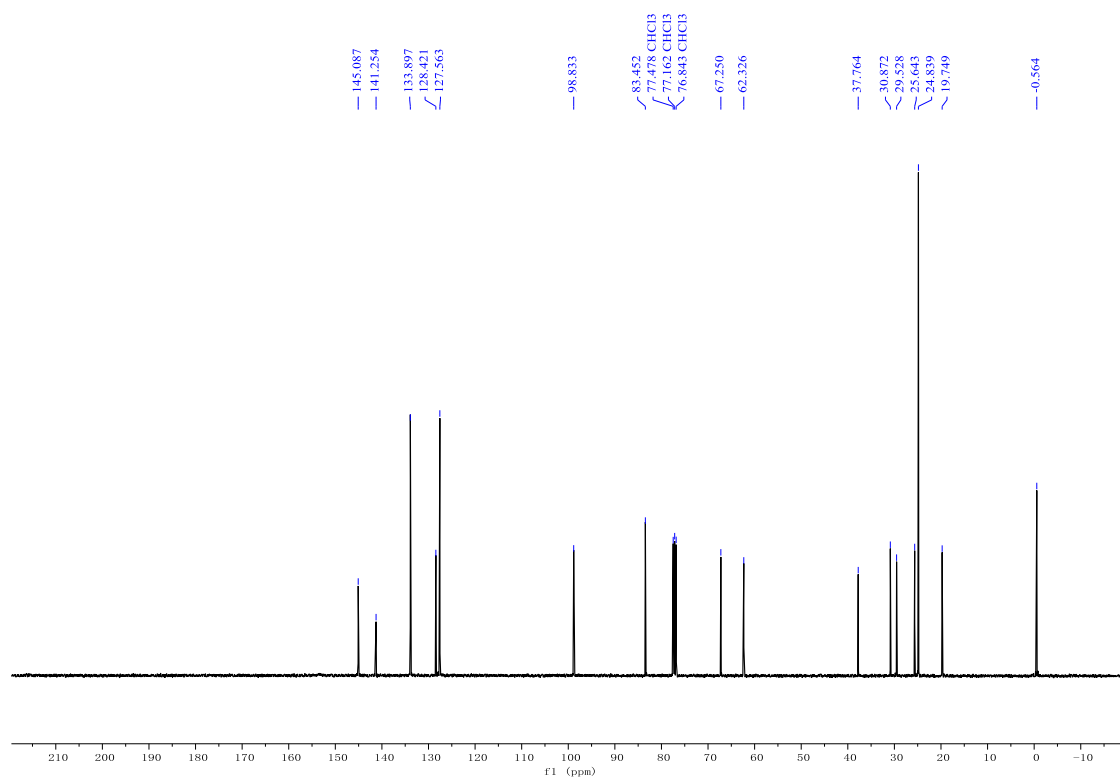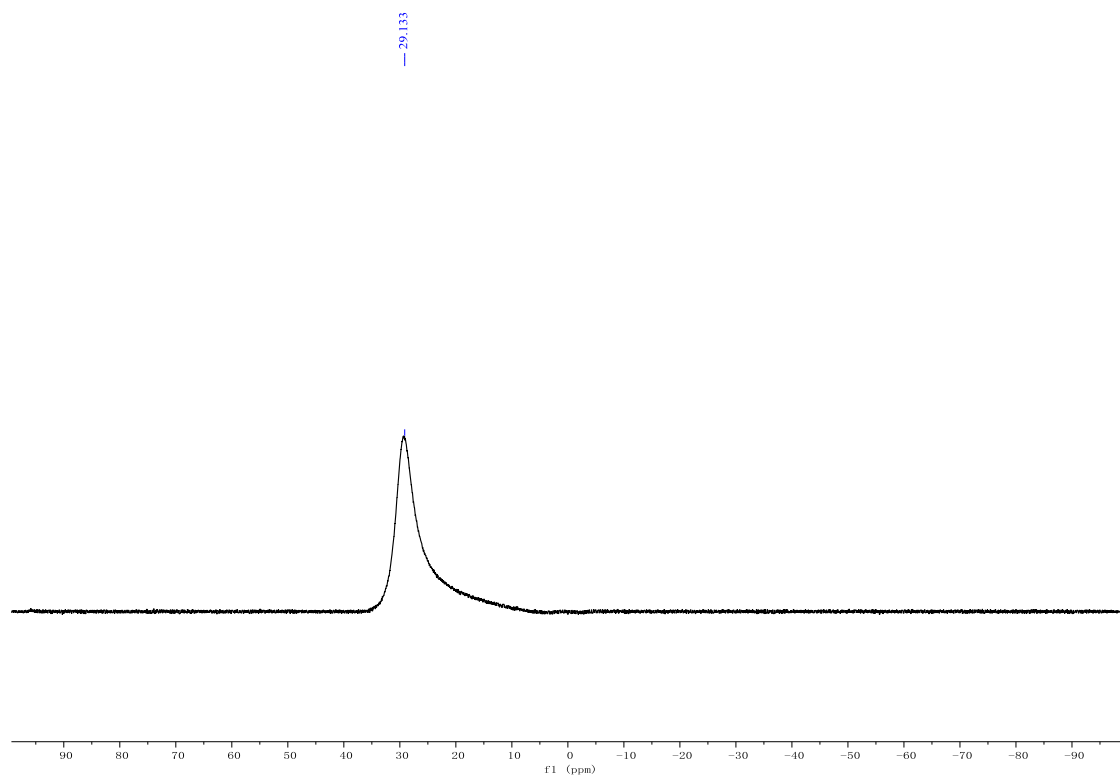

**(E)-5-(dimethyl(phenyl)silyl)-4-(4,4,5,5-tetramethyl-1,3,2-dioxaborolan-2-yl)pent-4-en-1-yl benzenesulfonate (3I).**

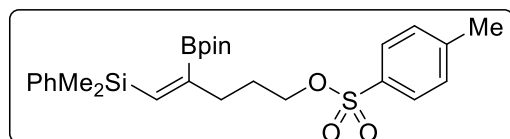

This compound was prepared by the general procedure A described above and was obtained as colorless oil in 78% yield (78.0 mg).  $R_f = 0.38$  (Petroleum ether:EtOAc = 90:10).

**$^1\text{H}$  NMR** (400 MHz, Chloroform- $d$ )  $\delta$  7.81 – 7.75 (m, 2H), 7.52 – 7.46 (m, 2H), 7.33 – 7.28 (m, 5H), 6.39 (s, 1H), 4.01 (t,  $J = 6.7$  Hz, 2H), 2.43 (s, 3H), 2.30 – 2.20 (m, 2H), 1.86 – 1.72 (m, 2H), 1.08 (s, 12H), 0.36 (s, 6H).

**$^{13}\text{C}$  NMR** (101 MHz, Chloroform- $d$ )  $\delta$  146.76, 144.66, 140.99, 133.88, 133.44, 129.92, 128.54, 128.02, 127.64, 83.63, 70.47, 36.92, 28.68, 24.82, 21.76, -0.65.

**$^{11}\text{B}$  NMR** (128 MHz, Chloroform- $d$ )  $\delta$  29.64.

**HRMS** (ESI)  $m/z$  calculated for  $\text{C}_{26}\text{H}_{37}\text{BO}_5\text{SSiNa}$   $[\text{M}+\text{Na}]^+$ : 523.2122, found: 523.2132.

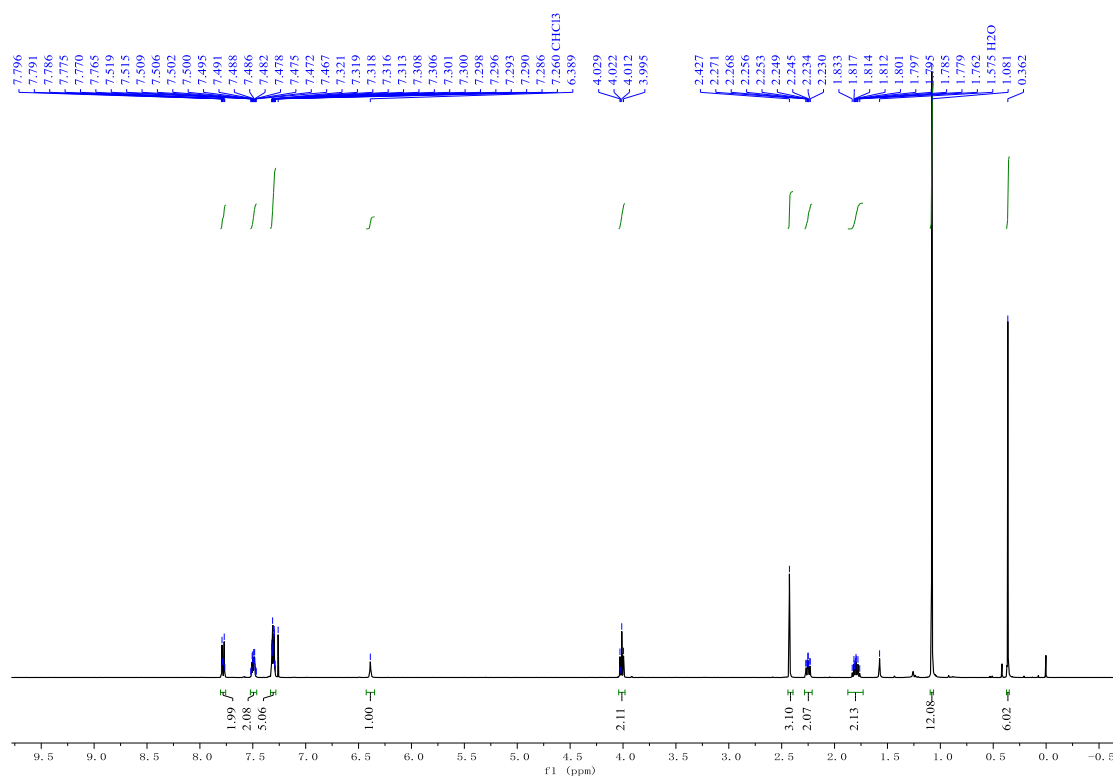

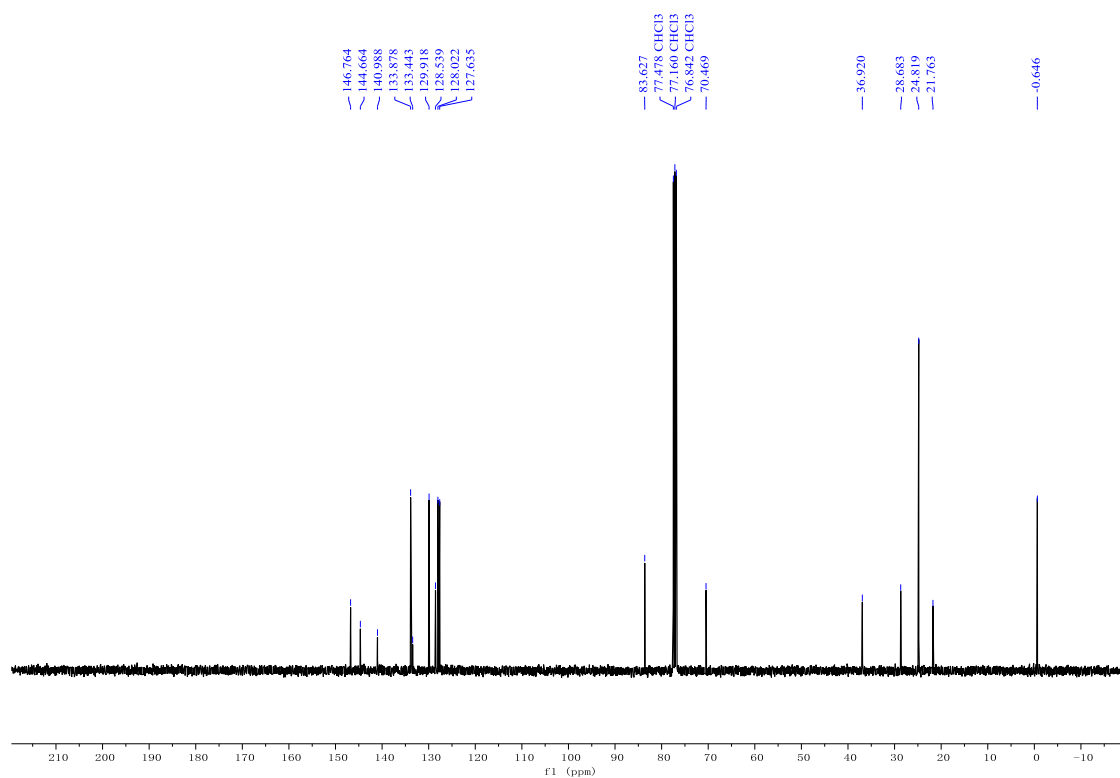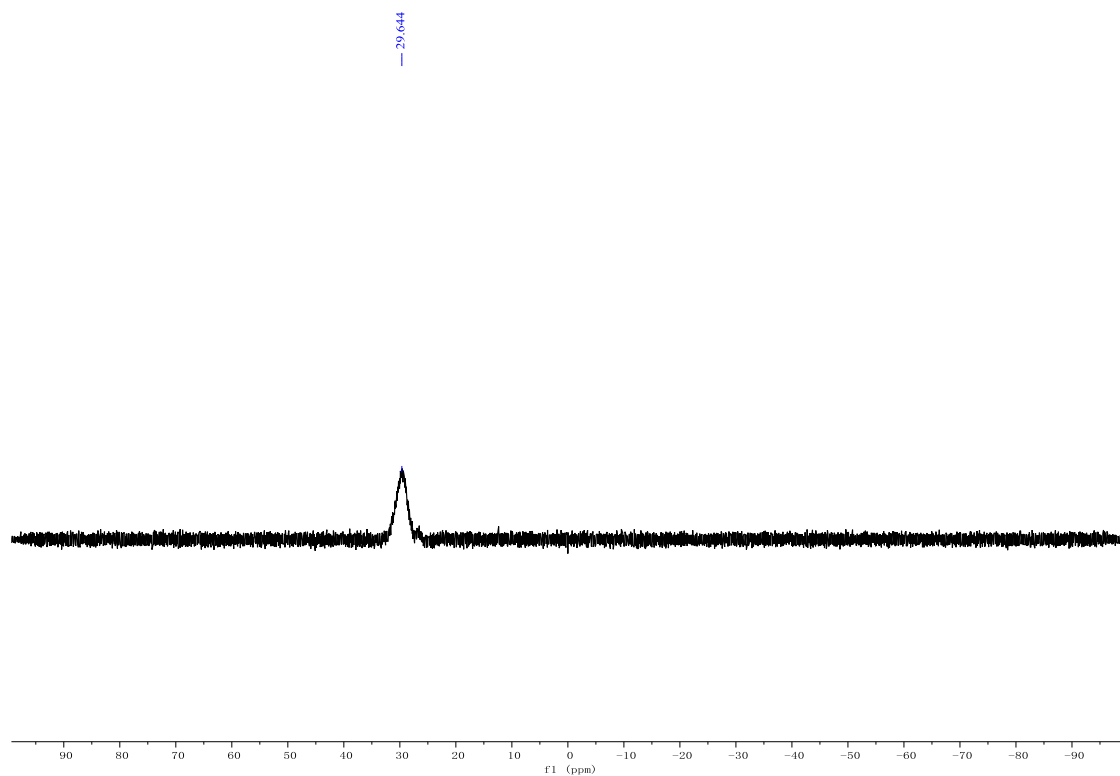

**(*E*)-2-(5-(dimethyl(phenyl)silyl)-4-(4,4,5,5-tetramethyl-1,3,2-dioxaborolan-2-yl)pent-4-en-1-yl)isoindoline-1,3-dione (3m) .**

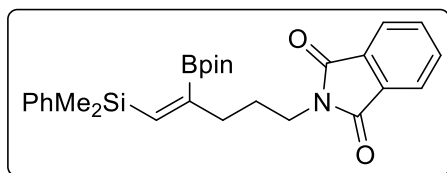

This compound was prepared by the general procedure A described above and was obtained as white solid in 80% yield (76.1 mg).  $R_f = 0.45$  (Petroleum ether:EtOAc = 90:10).

**$^1\text{H}$  NMR** (400 MHz, Chloroform-*d*)  $\delta$  7.89 – 7.79 (m, 2H), 7.75 – 7.65 (m, 2H), 7.59 – 7.47 (m, 2H), 7.31 (dt,  $J = 4.4, 2.8$  Hz, 3H), 6.47 (t,  $J = 1.4$  Hz, 1H), 3.69 (t,  $J = 7.4$  Hz, 2H), 2.33 (td,  $J = 7.4, 7.0, 1.4$  Hz, 2H), 1.90 – 1.77 (m, 2H), 1.10 (s, 12H), 0.38 (s, 6H).

**$^{13}\text{C}$  NMR** (101 MHz, Chloroform-*d*)  $\delta$  168.50, 145.77, 141.17, 133.92, 133.87, 132.40, 128.44, 127.58, 123.22, 83.56, 38.62, 38.11, 28.35, 24.82, -0.61.

**$^{11}\text{B}$  NMR** (128 MHz, Chloroform-*d*)  $\delta$  29.25.

**HRMS** (ESI)  $m/z$  calculated for  $\text{C}_{27}\text{H}_{34}\text{BNO}_4\text{SiNa}$   $[\text{M}+\text{Na}]^+$ : 498.2248, found: 498.2249.

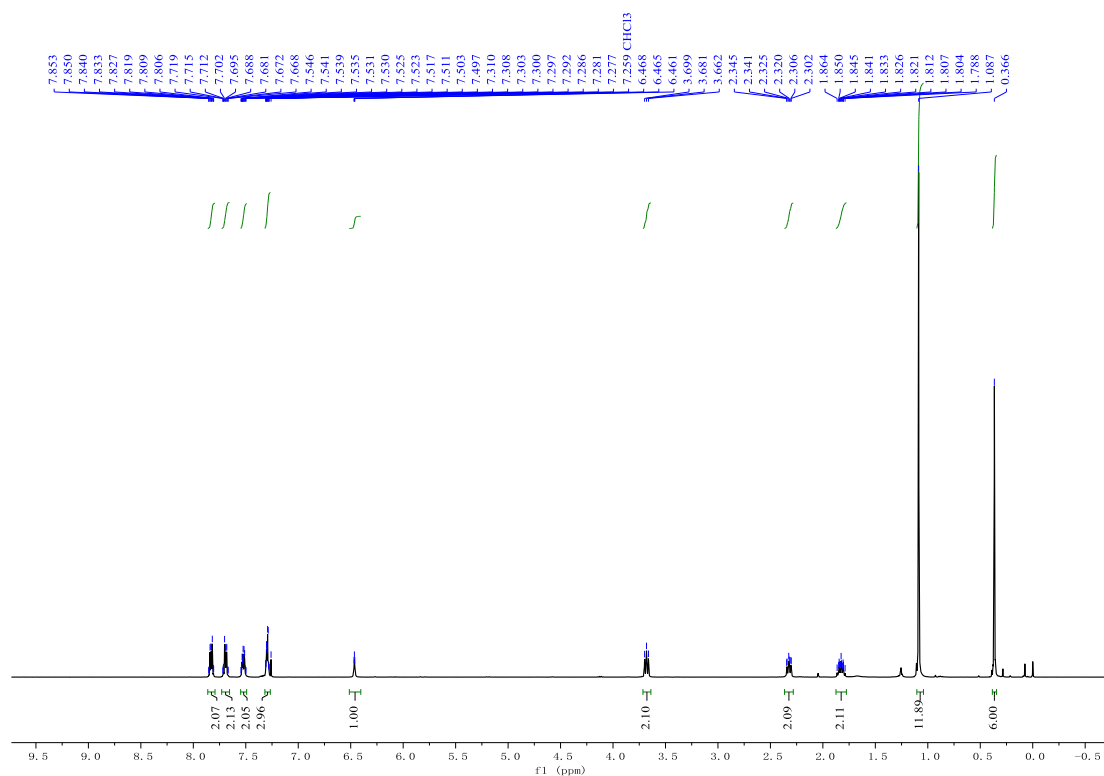

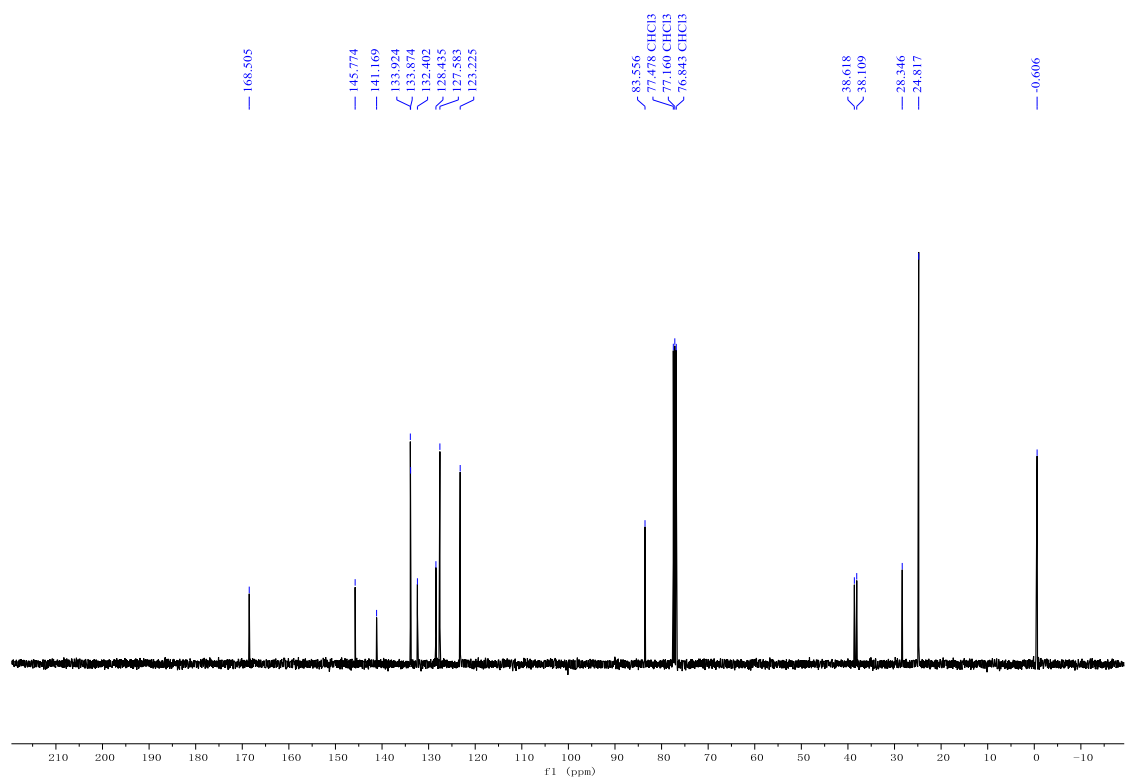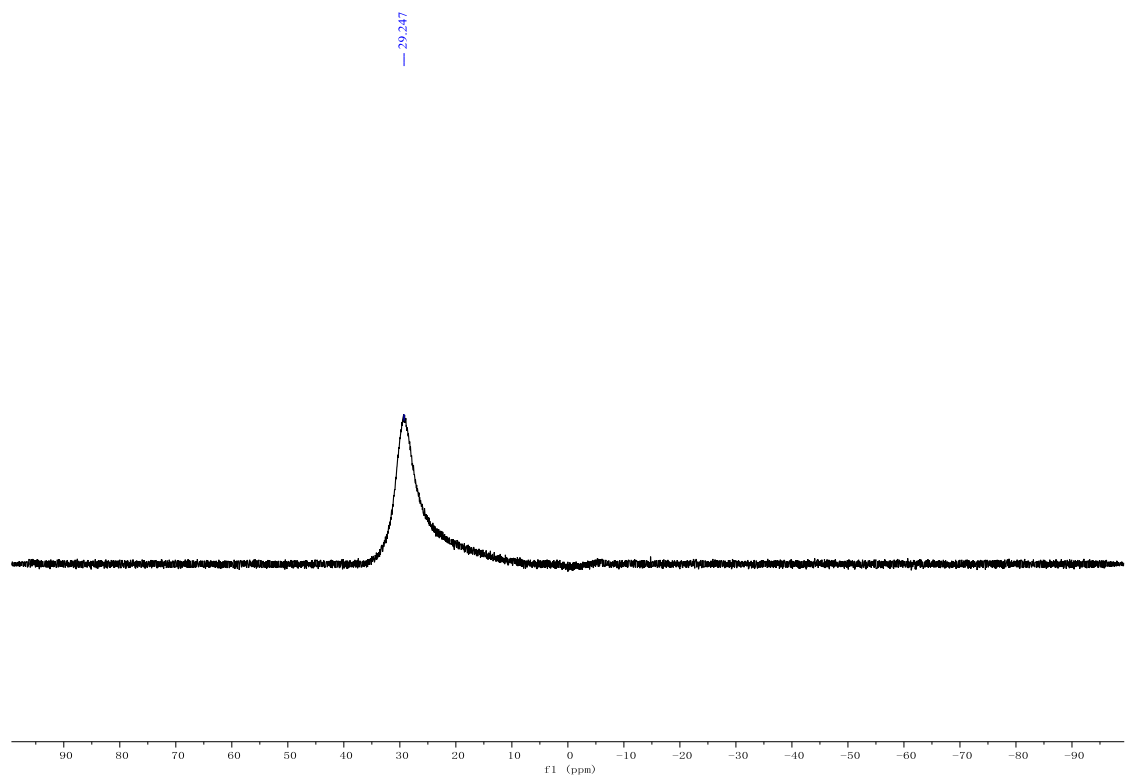



**(*E*)-(5-chloro-2-(4,4,5,5-tetramethyl-1,3,2-dioxaborolan-2-yl)pent-1-en-1-yl)dimethyl(phenyl)silane (3n).**

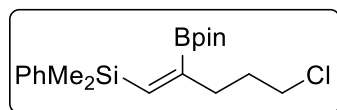

This compound was prepared by the general procedure A described above and was obtained as yellow oil in 51% yield (29.9 mg).  $R_f = 0.48$  (Petroleum ether:EtOAc = 98:2).

**$^1\text{H}$  NMR** (400 MHz, Chloroform-*d*)  $\delta$  7.58 – 7.48 (m, 2H), 7.36 – 7.27 (m, 3H), 6.49 (s, 1H), 3.52 (t,  $J = 6.9$  Hz, 2H), 2.39 (ddd,  $J = 7.6, 6.7, 1.4$  Hz, 2H), 1.97 – 1.88 (m, 2H), 1.12 (s, 12H), 0.40 (s, 6H).

**$^{13}\text{C}$  NMR** (101 MHz, Chloroform-*d*)  $\delta$  146.50, 141.07, 133.91, 128.54, 127.64, 83.63, 44.82, 38.53, 32.56, 24.86, -0.60.

**$^{11}\text{B}$  NMR** (128 MHz, Chloroform-*d*)  $\delta$  29.32.

**HRMS** (ESI)  $m/z$  calculated for  $\text{C}_{19}\text{H}_{30}\text{BClOSiNa}$   $[\text{M}+\text{Na}]^+$ : 387.1694, found: 387.1701.

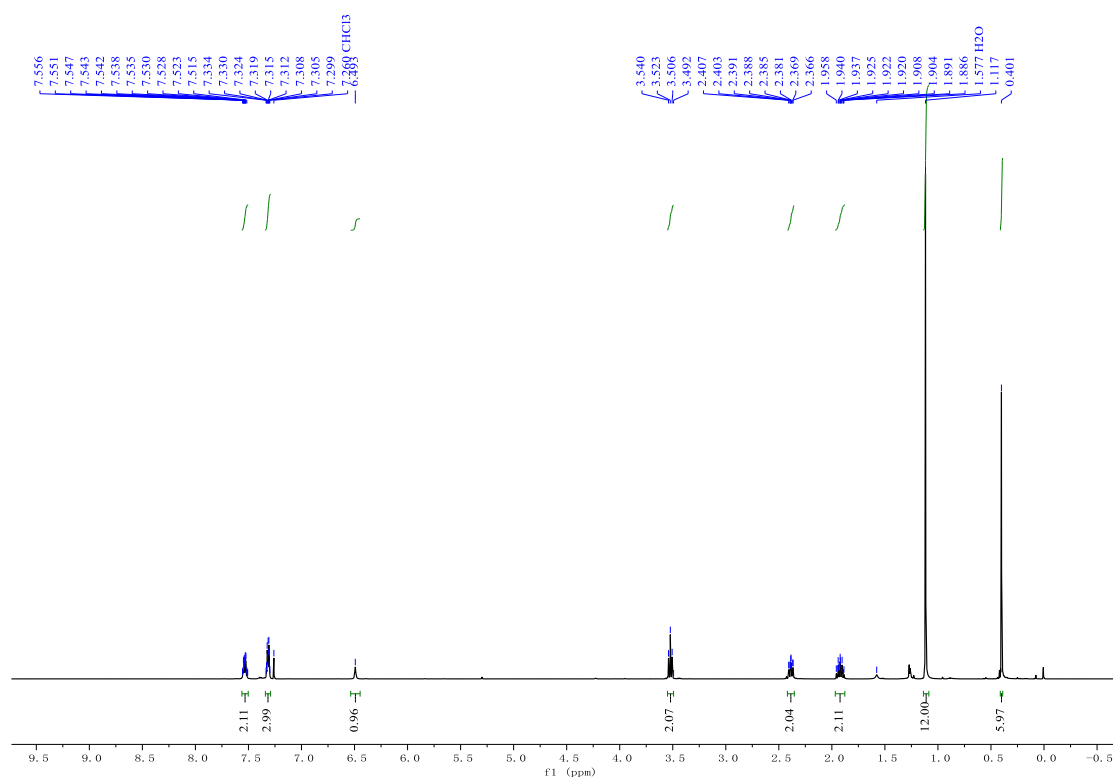

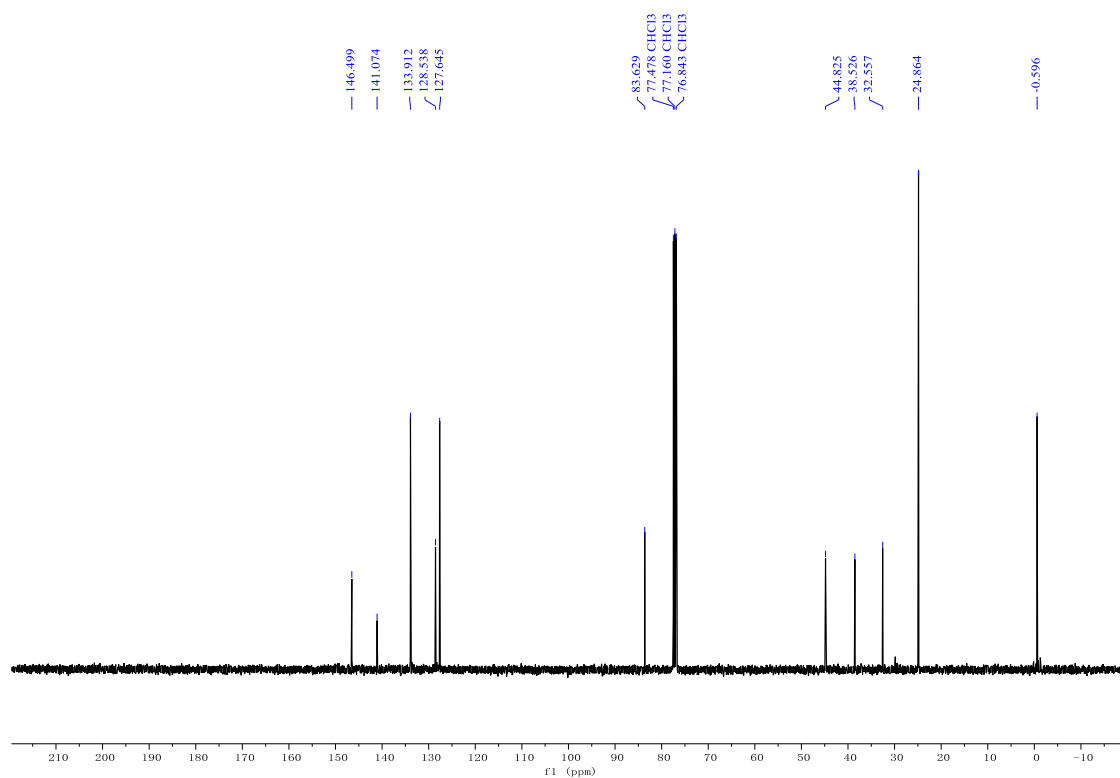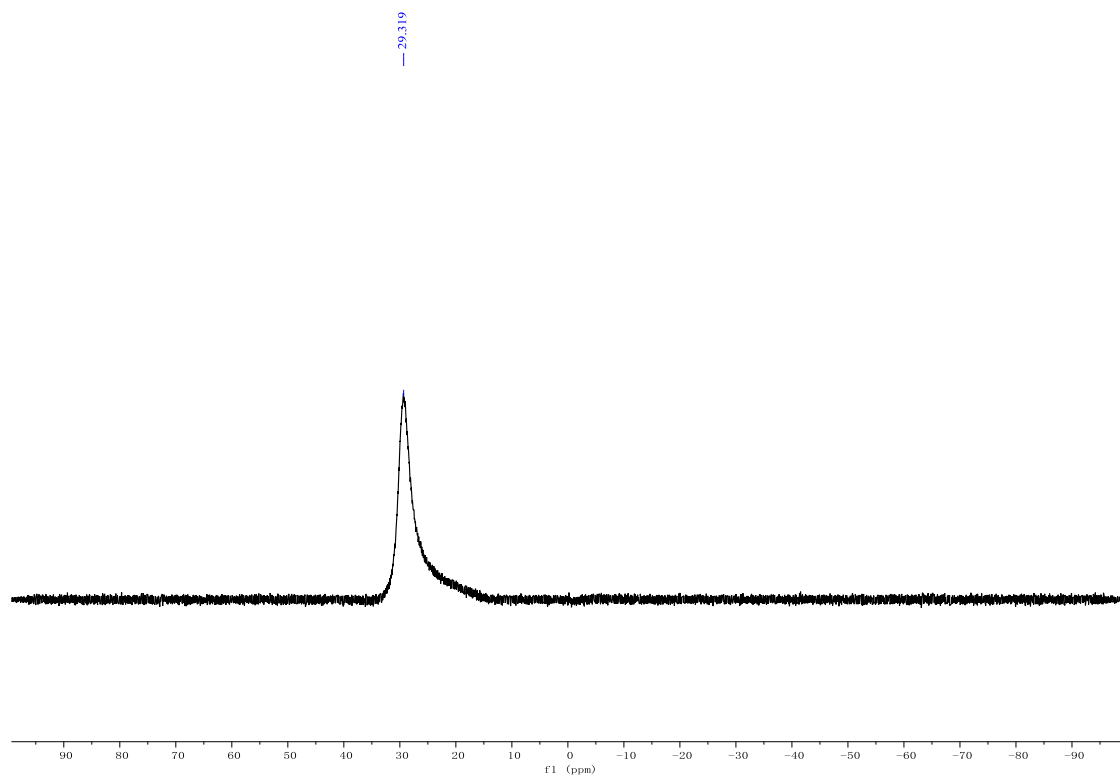

**(E)-6-(dimethyl(phenyl)silyl)-5-(4,4,5,5-tetramethyl-1,3,2-dioxaborolan-2-yl)hex-5-enenitrile (3o).**

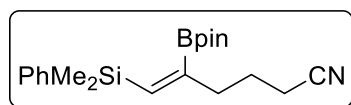

This compound was prepared by the general procedure A described above and was obtained as colorless oil in 47% yield (33.2 mg).  $R_f = 0.33$  (Petroleum ether:EtOAc = 95:5).

**$^1\text{H}$  NMR** (400 MHz, Chloroform- $d$ )  $\delta$  7.57 – 7.48 (m, 2H), 7.36 – 7.28 (m, 3H), 6.51 (s, 1H), 2.41 – 2.35 (m, 2H), 2.30 (t,  $J = 7.3$  Hz, 2H), 1.87 – 1.76 (m, 2H), 1.12 (s, 12H), 0.41 (s, 6H).

**$^{13}\text{C}$  NMR** (101 MHz, Chloroform- $d$ )  $\delta$  147.87, 140.83, 133.86, 128.61, 127.68, 120.08, 83.73, 40.24, 25.34, 24.85, 16.62, -0.67.

**$^{11}\text{B}$  NMR** (128 MHz, Chloroform- $d$ )  $\delta$  28.81.

**HRMS** (ESI)  $m/z$  calculated for  $\text{C}_{20}\text{H}_{30}\text{BNO}_2\text{SiNa}$   $[\text{M}+\text{Na}]^+$ : 378.2037, found: 378.2039.

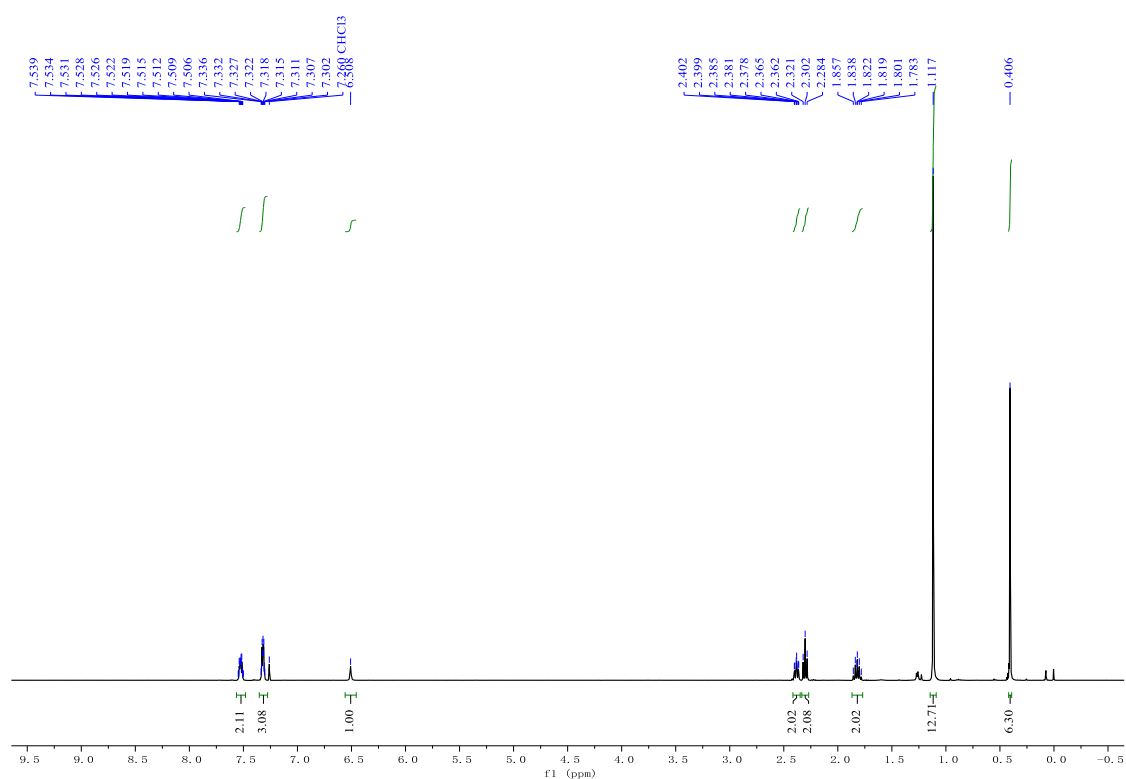

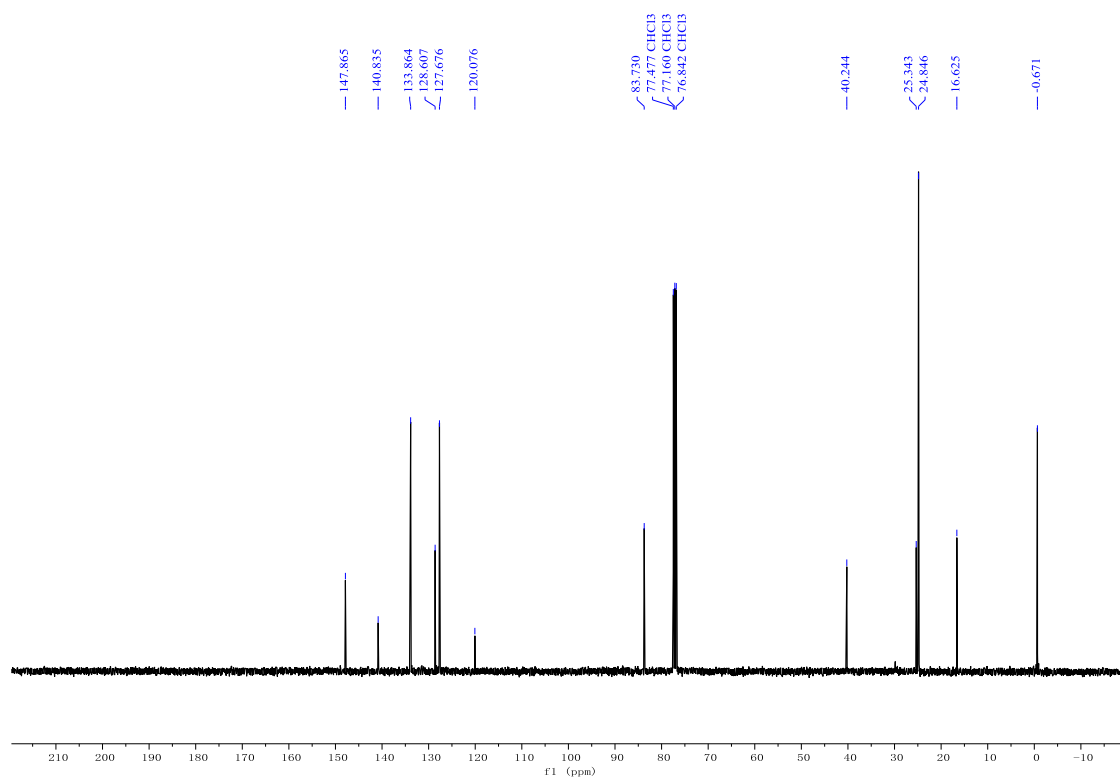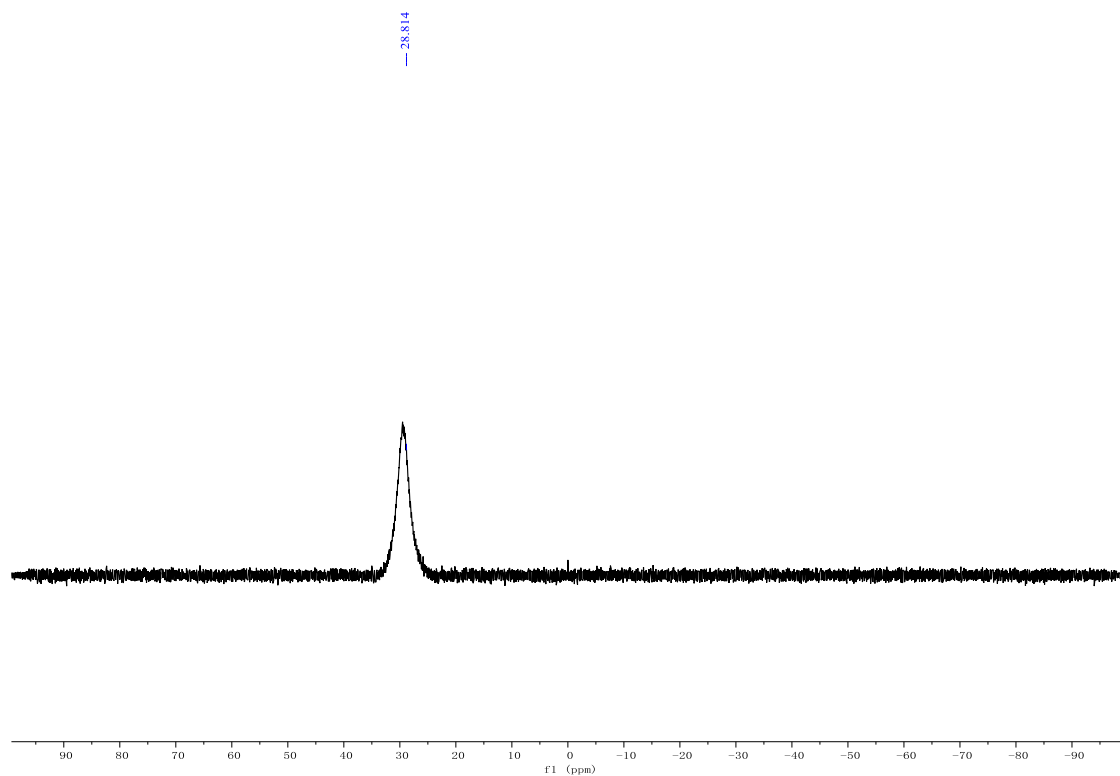

**(*E*)-dimethyl(phenyl)(2-(4,4,5,5-tetramethyl-1,3,2-dioxaborolan-2-yl)hexa-1,5-dien-1-yl) silane (3p).**

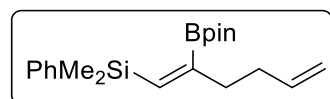

This compound was prepared by the general procedure A described above and was obtained as colorless oil in 63% yield (42.6 mg).  $R_f = 0.26$  (Petroleum ether:EtOAc = 98:2).

**$^1\text{H}$  NMR** (400 MHz, Chloroform- $d$ )  $\delta$  7.57 – 7.52 (m, 2H), 7.33 – 7.28 (m, 3H), 6.44 (s, 1H), 5.82 (ddt,  $J = 16.9, 10.1, 6.6$  Hz, 1H), 5.03 – 4.91 (m, 2H), 2.39 – 2.31 (m, 2H), 2.23 – 2.15 (m, 2H), 1.11 (s, 12H), 0.39 (s, 6H).

**$^{13}\text{C}$  NMR** (101 MHz, Chloroform- $d$ )  $\delta$  145.27, 141.33, 138.91, 133.96, 128.45, 127.59, 114.49, 83.49, 40.73, 34.07, 24.87, -0.51.

**$^{11}\text{B}$  NMR** (128 MHz, Chloroform- $d$ )  $\delta$  29.92.

**HRMS** (ESI)  $m/z$  calculated for  $\text{C}_{20}\text{H}_{31}\text{BO}_2\text{SiNa}$   $[\text{M}+\text{Na}]^+$ : 365.2084, found: 365.2080.

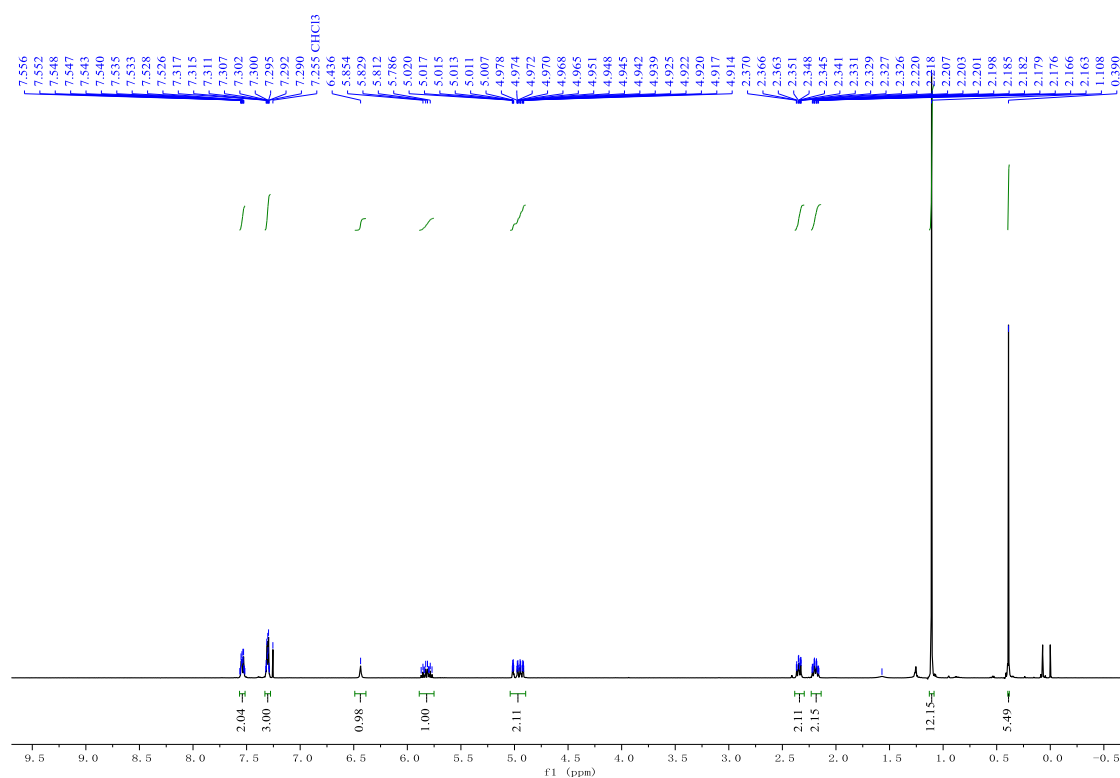

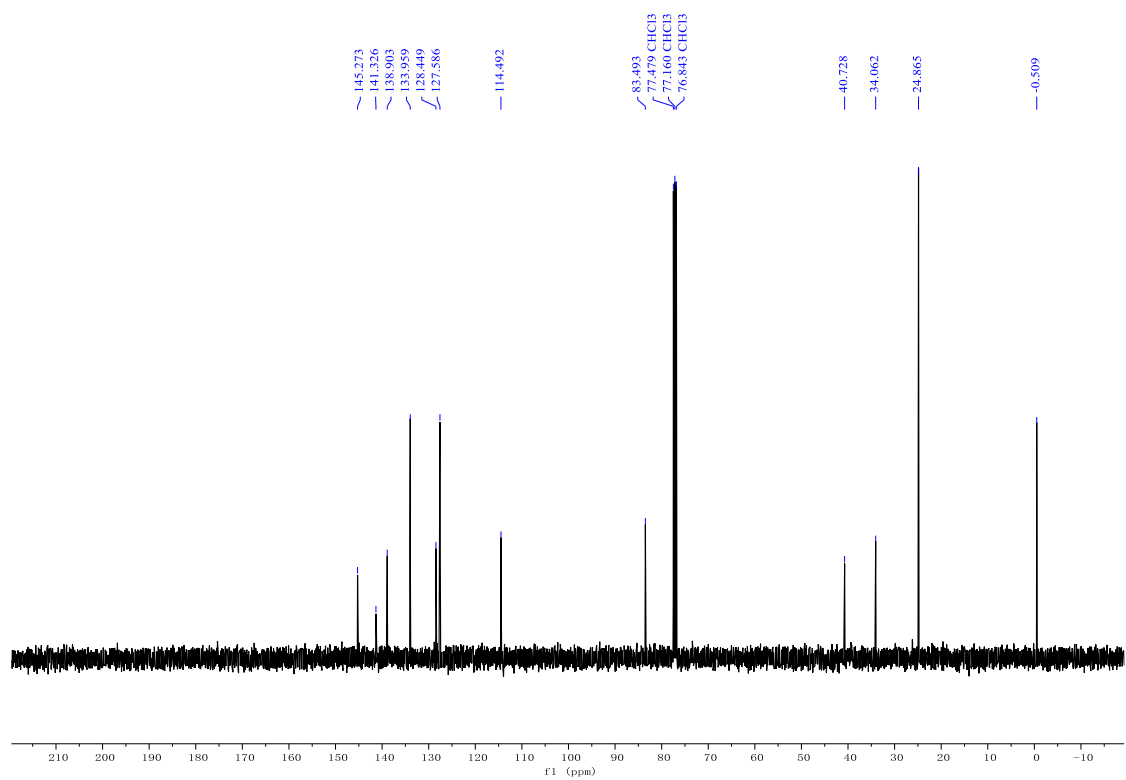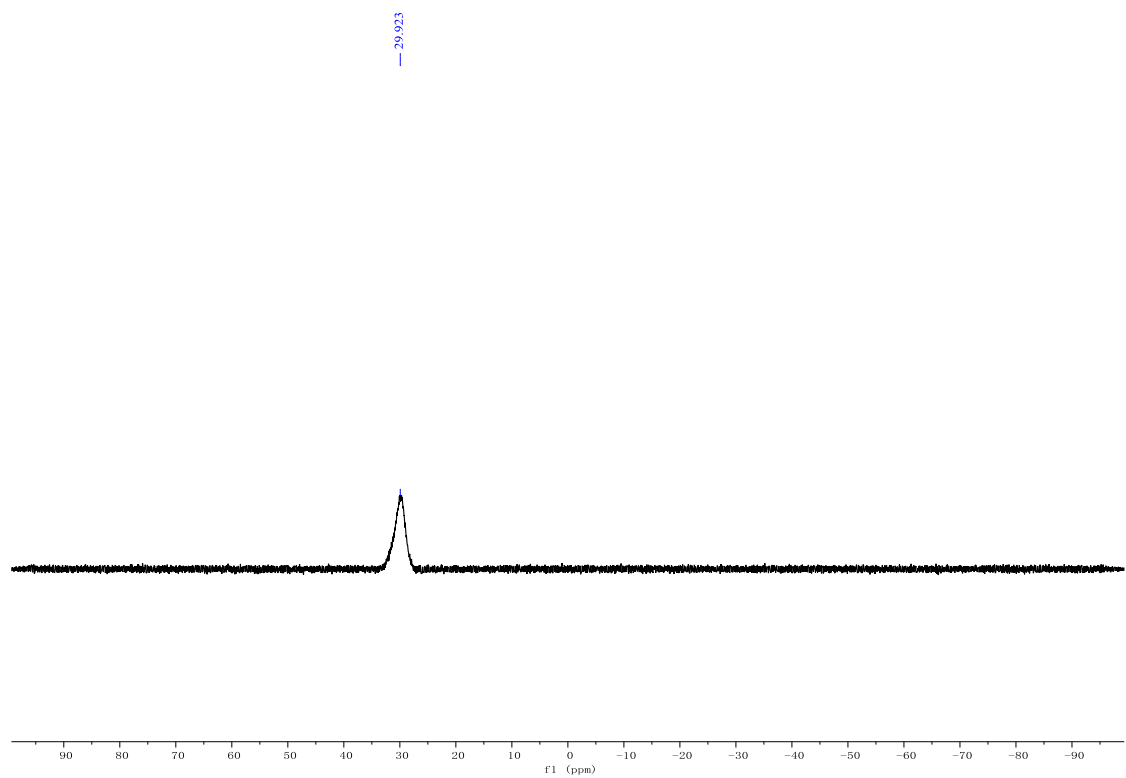

**(*E*)-(2-(cyclohex-1-en-1-yl)-2-(4,4,5,5-tetramethyl-1,3,2-dioxaborolan-2-yl)vinyl)dimethyl (phenyl)silane (3r).**

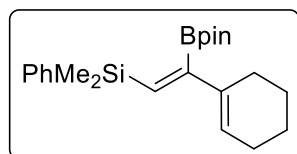

This compound was prepared by the general procedure A described above and was obtained as colorless oil in 56% yield (41.1 mg).  $R_f$  = 0.15 (Petroleum ether:EtOAc = 99:1).

**$^1\text{H}$  NMR** (400 MHz, Chloroform-*d*)  $\delta$  7.60 – 7.53 (m, 2H), 7.36 – 7.28 (m, 3H), 6.39 (s, 1H), 6.04 (td,  $J$  = 3.9, 1.9 Hz, 1H), 2.20 (dddt,  $J$  = 15.5, 6.8, 4.9, 2.3 Hz, 4H), 1.75 – 1.62 (m, 2H), 1.64 – 1.53 (m, 2H), 1.13 (s, 12H), 0.41 (s, 6H).

**$^{13}\text{C}$  NMR** (101 MHz, Chloroform-*d*)  $\delta$  140.84, 140.51, 134.73, 134.22, 129.53, 128.73, 127.76, 83.86, 26.46, 25.64, 25.34, 22.98, 22.40, -0.23.

**$^{11}\text{B}$  NMR** (128 MHz, Chloroform-*d*)  $\delta$  30.83.

**HRMS** (ESI)  $m/z$  calculated for  $\text{C}_{22}\text{H}_{33}\text{BO}_2\text{SiNa}$   $[\text{M}+\text{Na}]^+$ : 391.2241, found: 391.2247.

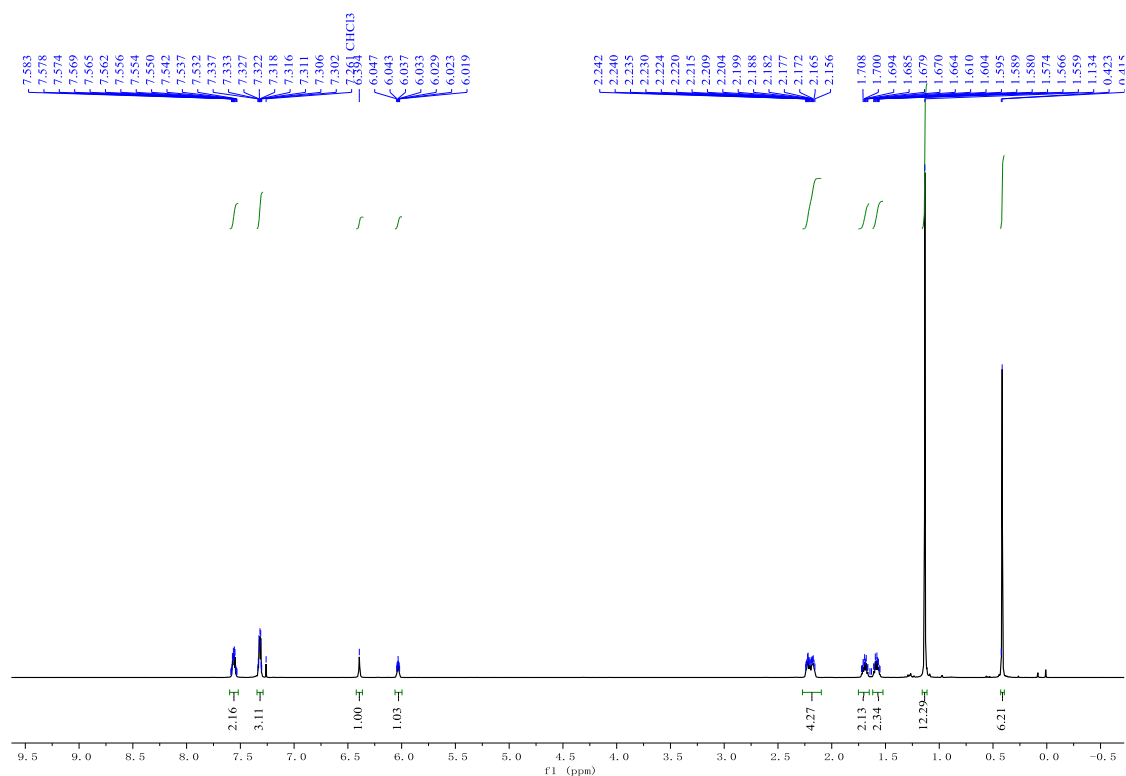

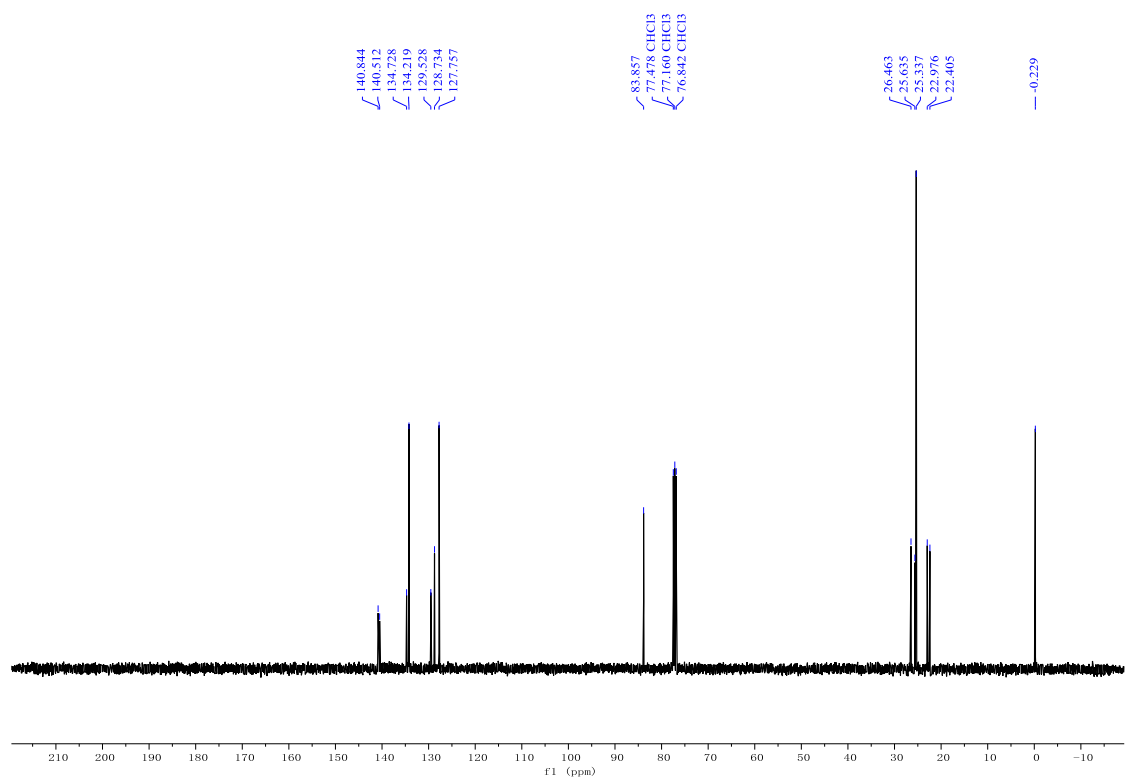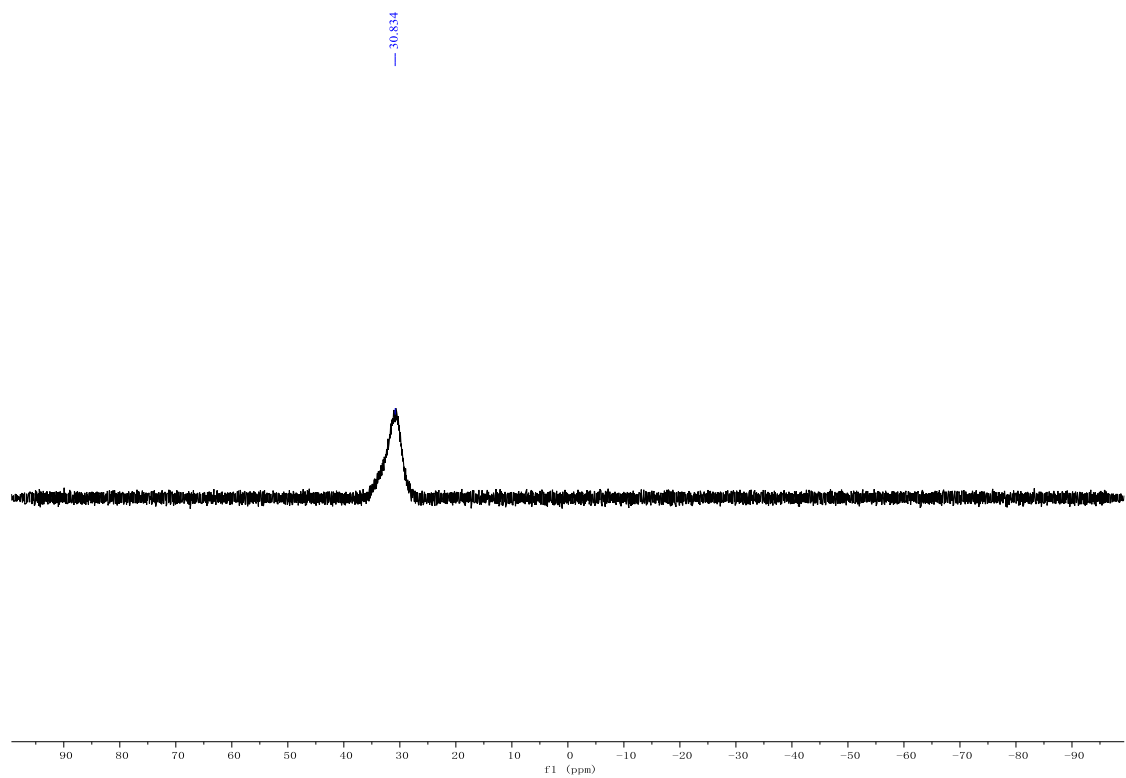



**(E)-dimethyl(phenyl)(3-(4,4,5,5-tetramethyl-1,3,2-dioxaborolan-2-yl)oct-2-en-2-yl)silane (3s).**

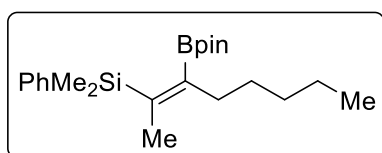

This compound was prepared by the general procedure A described above and was obtained as colorless oil of inseparable mixture (2/3 = 85:15) in 59% yield (44.8 mg).  $R_f$  = 0.48 (Petroleum ether:EtOAc = 98:2).

**$^1\text{H}$  NMR** (400 MHz, Chloroform- $d$ )  $\delta$  7.54 – 7.47 (m, 2H), 7.32 – 7.26 (m, 3H), 2.30 (t,  $J$  = 7.5 Hz, 2H), 1.81 (s, 3H), 1.34 (tdd,  $J$  = 12.2, 6.9, 2.1 Hz, 6H), 1.07 (s, 12H), 0.94 – 0.88 (m, 3H), 0.40 (s, 6H).

**$^{13}\text{C}$  NMR** (101 MHz, Chloroform- $d$ )  $\delta$  146.78, 141.29, 134.03, 128.34, 127.57, 83.18, 32.55, 32.27, 29.24, 25.03, 22.74, 19.12, 14.23, -0.26.

**$^{11}\text{B}$  NMR** (128 MHz, Chloroform- $d$ )  $\delta$  29.84.

**HRMS** (ESI)  $m/z$  calculated for  $\text{C}_{22}\text{H}_{37}\text{BO}_2\text{Si Na}$   $[\text{M}+\text{Na}]^+$ : 395.2554, found: 395.2565.

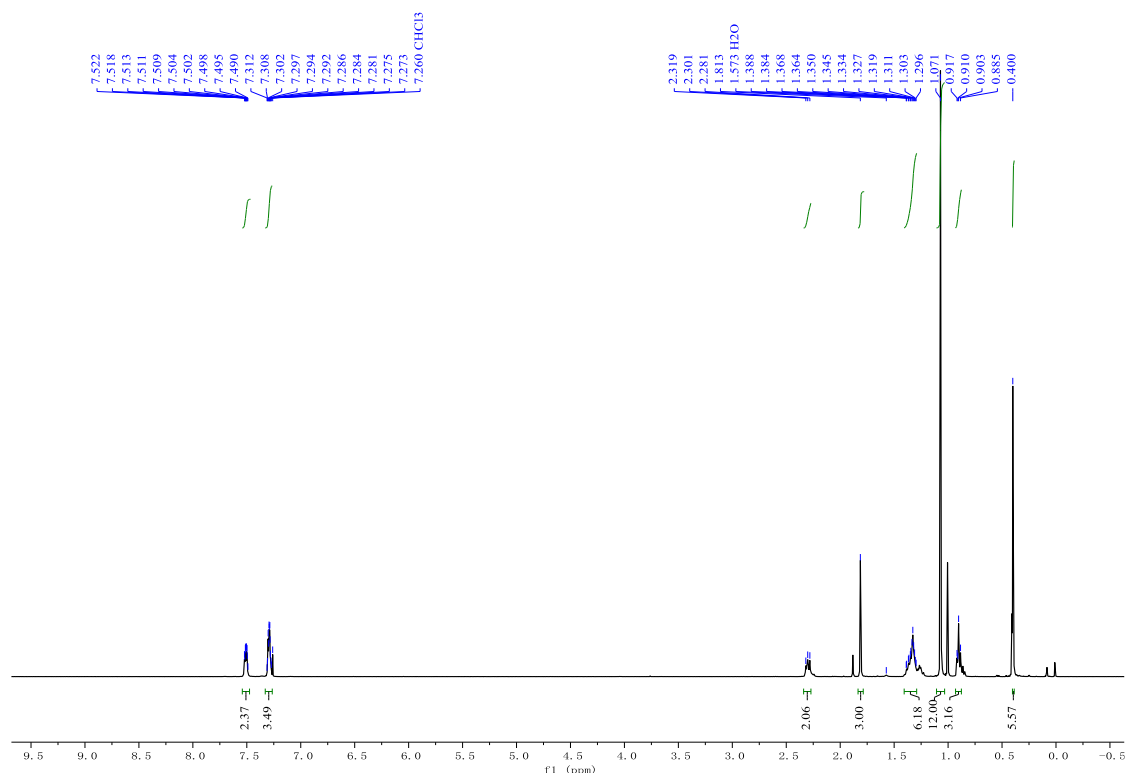

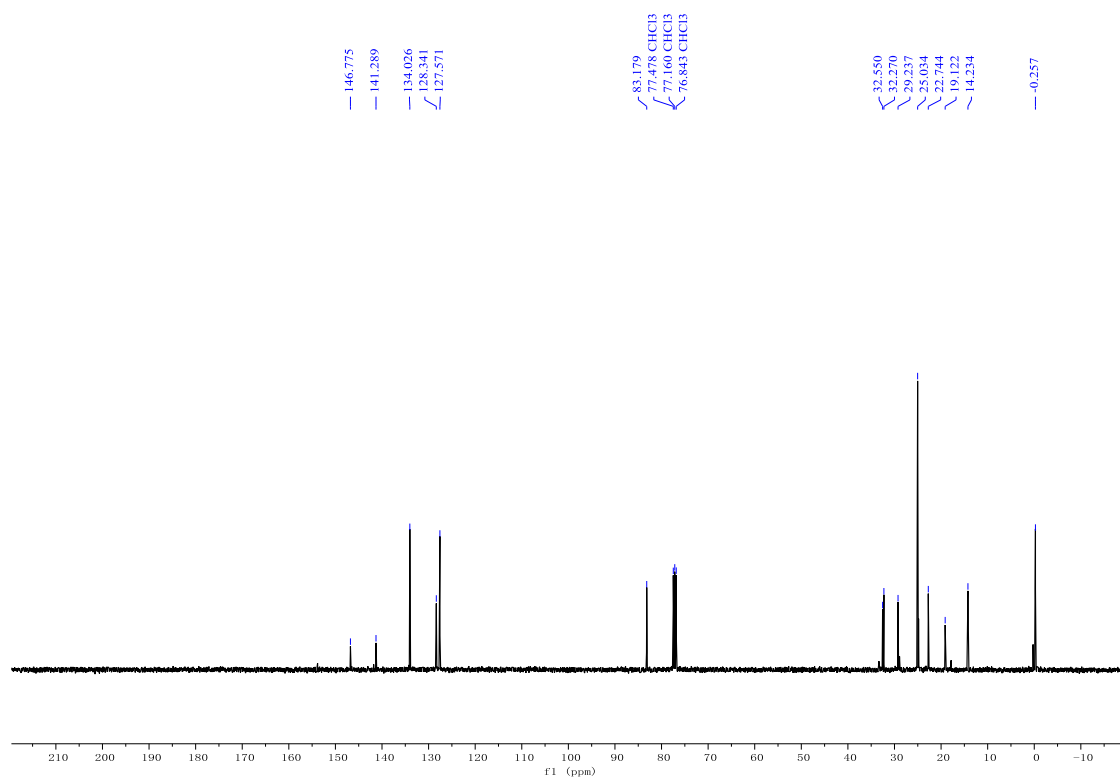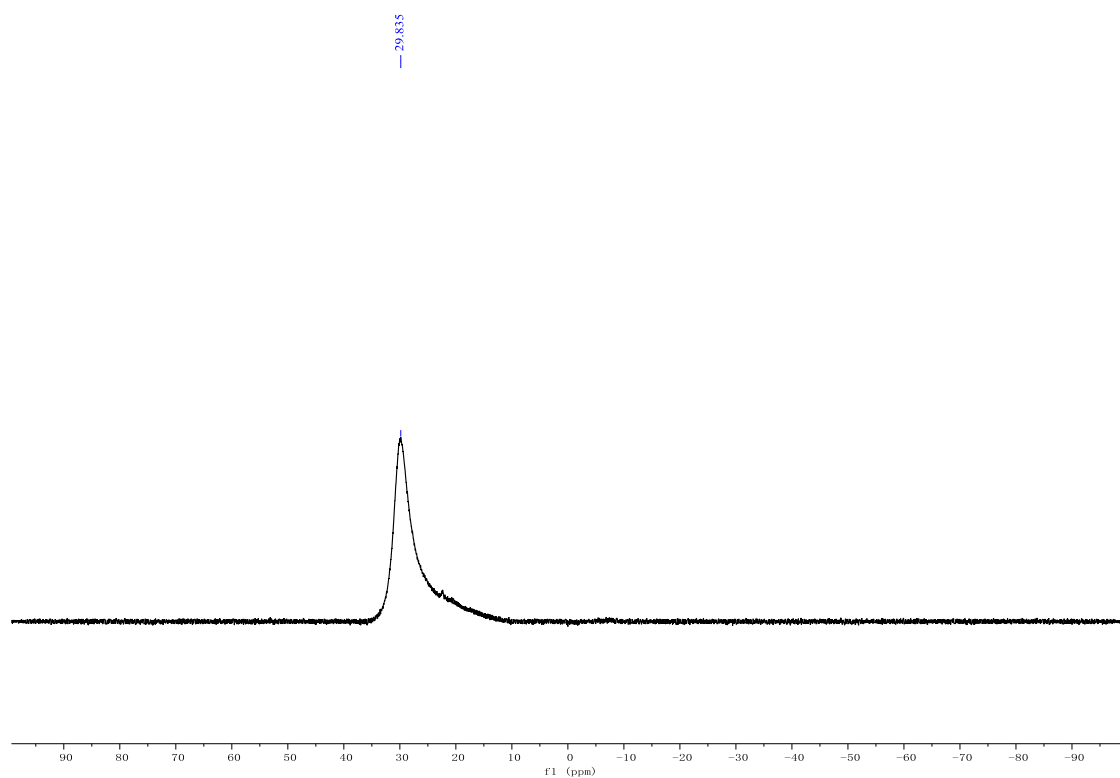

**(*E*)-dimethyl(phenyl)(2-phenyl-2-(4,4,5,5-tetramethyl-1,3,2-dioxaborolan-2-yl)vinyl)silane (3t).**

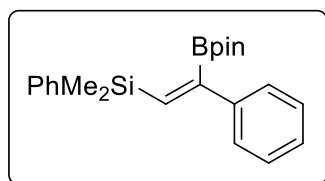

This compound was prepared by the general procedure A described above and was obtained as colorless oil in 10% yield (7.3 mg).  $R_f = 0.28$  (Petroleum ether:EtOAc = 98:2).

$^1\text{H}$  NMR (400 MHz, Chloroform-*d*)  $\delta$  7.62 – 7.55 (m, 2H), 7.46 – 7.40 (m, 2H), 7.35 – 7.31 (m, 3H), 7.31 – 7.27 (m, 2H), 7.25 – 7.20 (m, 1H), 6.86 (s, 1H), 1.15 (s, 12H), 0.48 (s, 6H).

$^{13}\text{C}$  NMR (101 MHz, Chloroform-*d*)  $\delta$  147.74, 145.42, 140.70, 134.03, 128.71, 128.17, 127.75, 127.15, 127.11, 84.01, 25.00, -0.44.

$^{11}\text{B}$  NMR (128 MHz, Chloroform-*d*)  $\delta$  30.13.

HRMS (ESI)  $m/z$  calculated for  $\text{C}_{22}\text{H}_{29}\text{BO}_2\text{SiNa}$   $[\text{M}+\text{Na}]^+$ : 387.1928, found: 387.1933.

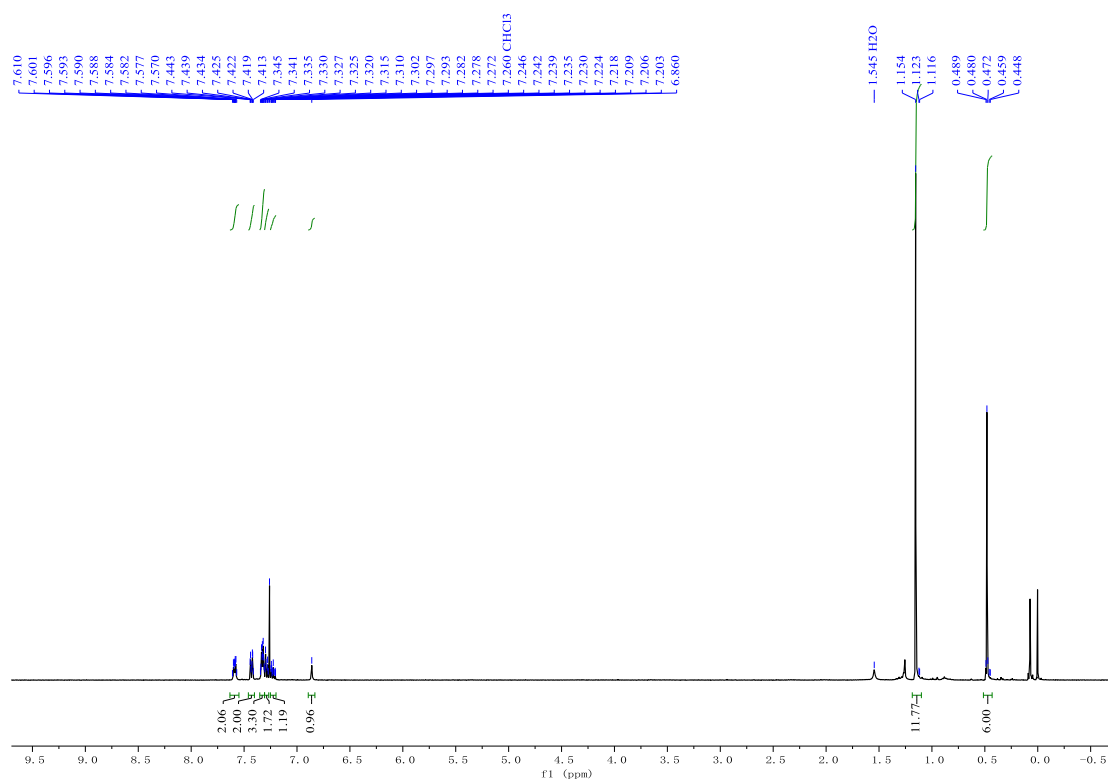

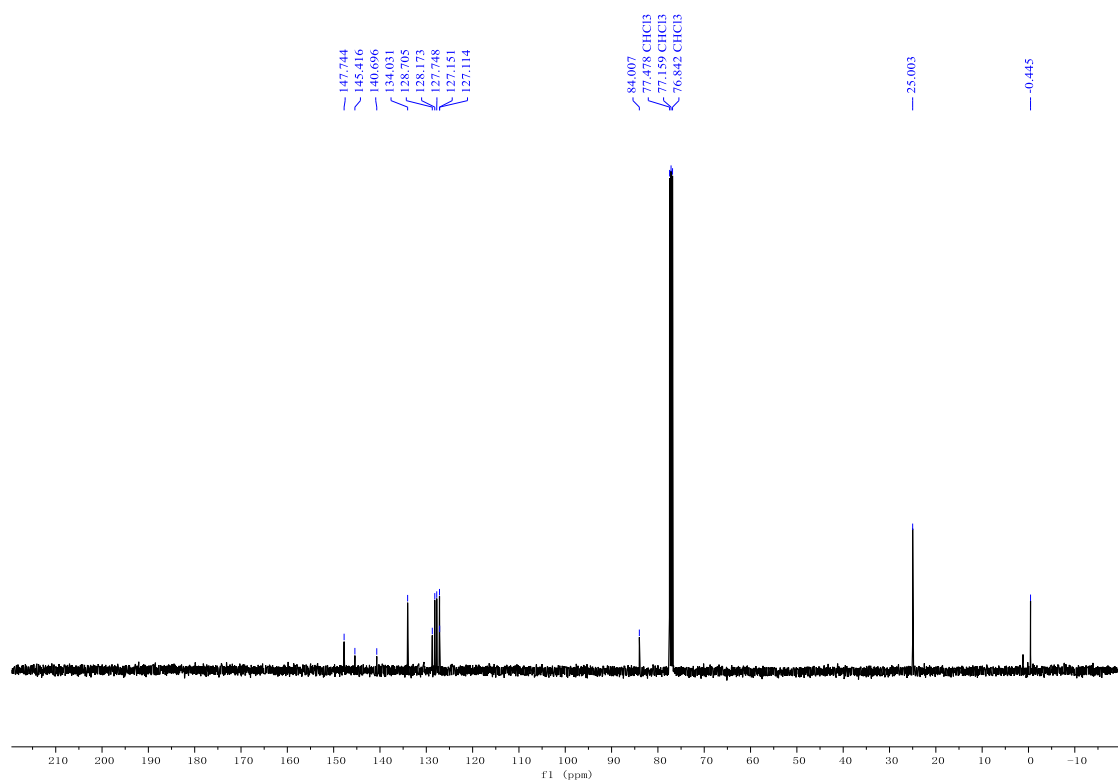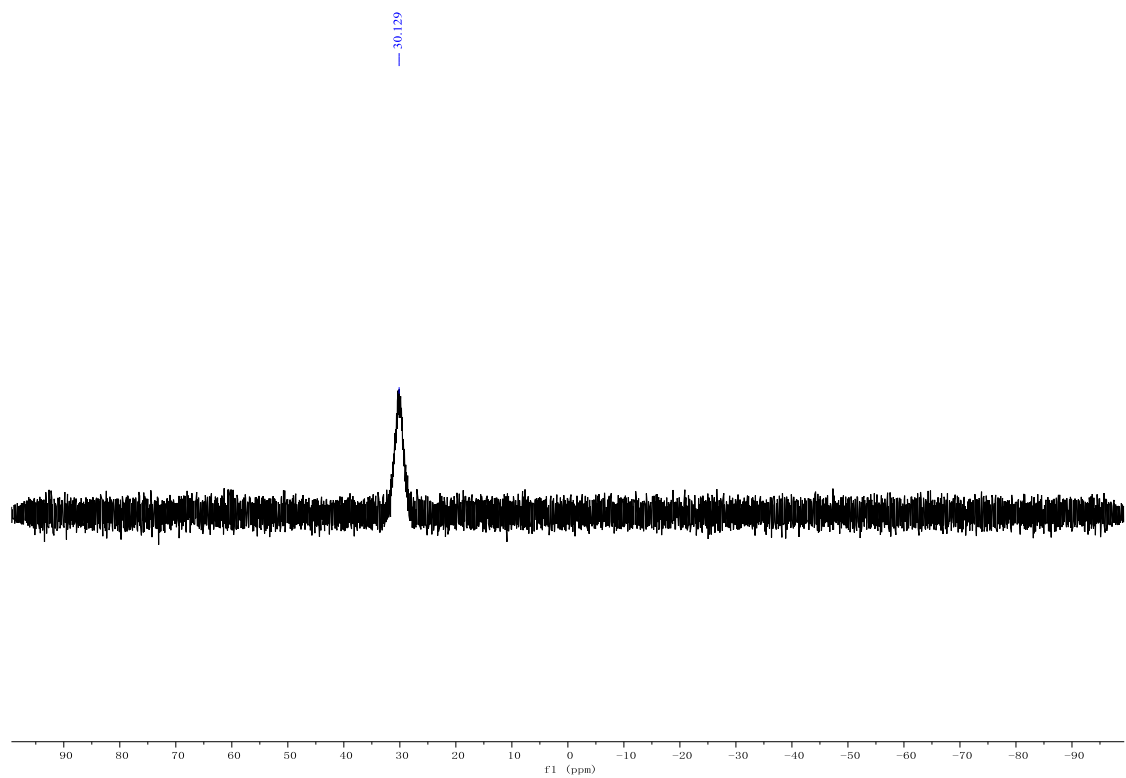

## B. Characterization data and spectrum of products 5

### (E)-dimethyl(phenyl)(styryl)silane (5t).

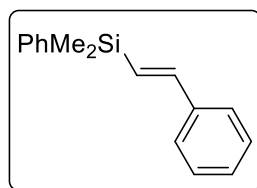

This compound was prepared by the general procedure A described above and was obtained as white solid in 53% yield (25.2 mg).  $R_f = 0.70$  (Petroleum ether:EtOAc = 98:2).

$^1\text{H NMR}$  (400 MHz, Chloroform- $d$ )  $\delta$  7.61 – 7.54 (m, 2H), 7.45 (dd,  $J = 7.1, 1.6$  Hz, 2H), 7.40 – 7.35 (m, 3H), 7.35 – 7.29 (m, 2H), 7.28 – 7.22 (m, 1H), 6.94 (d,  $J = 19.1$  Hz, 1H), 6.59 (d,  $J = 19.1$  Hz, 1H), 0.43 (s, 6H).

$^{13}\text{C NMR}$  (101 MHz, Chloroform- $d$ )  $\delta$  145.43, 138.73, 138.30, 134.07, 129.19, 128.67, 128.31, 127.97, 127.26, 126.64, -2.38.

**HRMS** (ESI)  $m/z$  calculated for  $\text{C}_{16}\text{H}_{18}\text{SiNa}$   $[\text{M}+\text{Na}]^+$ : 261.1070, found: 261.1062.

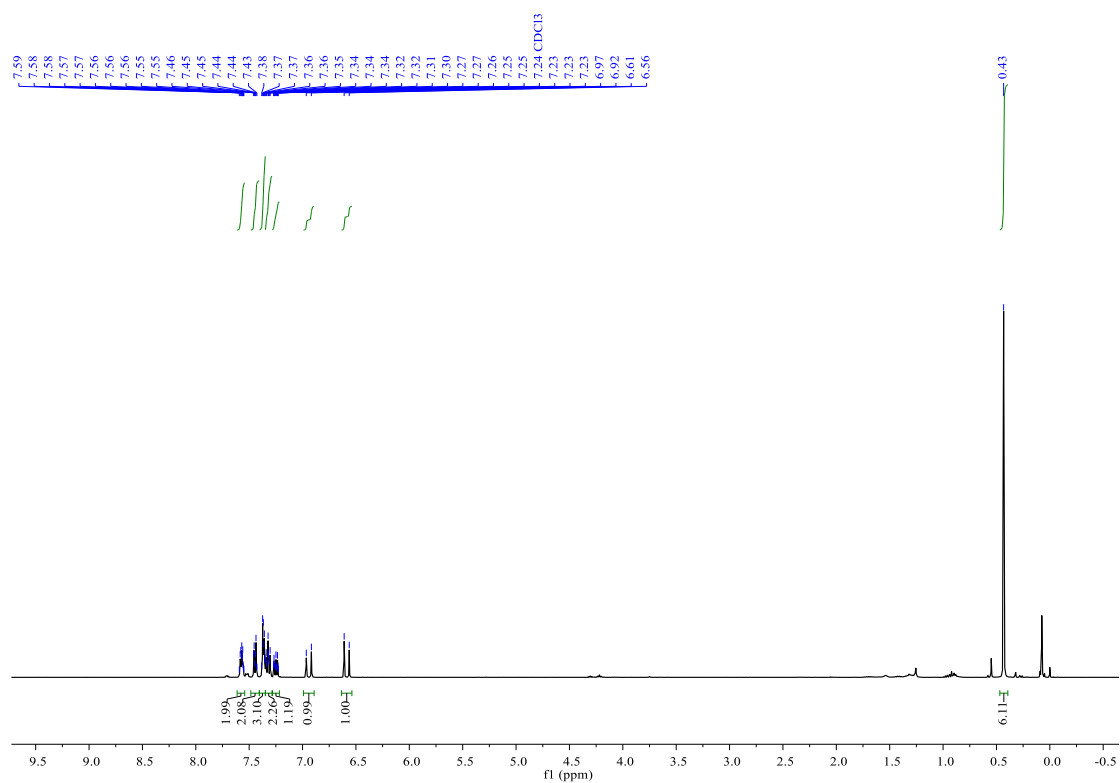

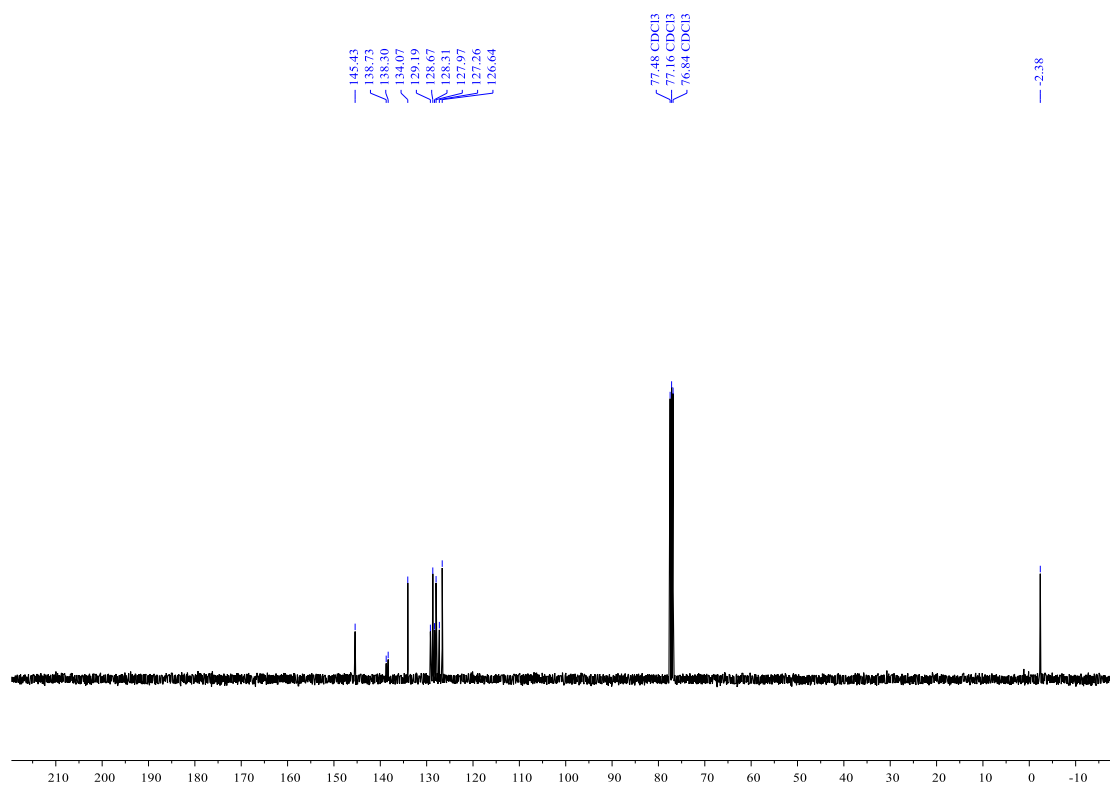

### C. Characterization data and spectrum of products 7

#### dimethyl(phenyl)(1-phenyl-2,2-bis(4,4,5,5-tetramethyl-1,3,2-dioxaborolan-2-yl)vinyl)silane (7t).

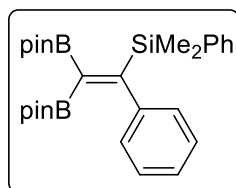

This compound was prepared by the general procedure A described above and was obtained as white solid in 32% yield (31.4 mg).  $R_f = 0.10$  (Petroleum ether:EtOAc = 95:5).

**$^1\text{H}$  NMR** (400 MHz, Chloroform- $d$ )  $\delta$  7.58 – 7.51 (m, 2H), 7.30 – 7.21 (m, 3H), 7.20 – 7.13 (m, 2H), 7.12 – 7.05 (m, 1H), 7.03 – 6.94 (m, 2H), 1.06 (s, 12H), 0.95 (s, 12H), 0.28 (s, 6H).

**$^{13}\text{C}$  NMR** (101 MHz, Chloroform- $d$ )  $\delta$  172.48, 148.49, 139.61, 134.36, 128.52, 127.51, 127.48, 126.99, 125.55, 83.43, 83.31, 24.94, 24.44, -0.45.

**$^{11}\text{B}$  NMR** (128 MHz, Chloroform- $d$ )  $\delta$  30.57.

**HRMS** (ESI)  $m/z$  calculated for  $\text{C}_{28}\text{H}_{40}\text{B}_2\text{O}_4\text{SiNa}$   $[\text{M}+\text{Na}]^+$ : 513.2780, found: 513.2791.

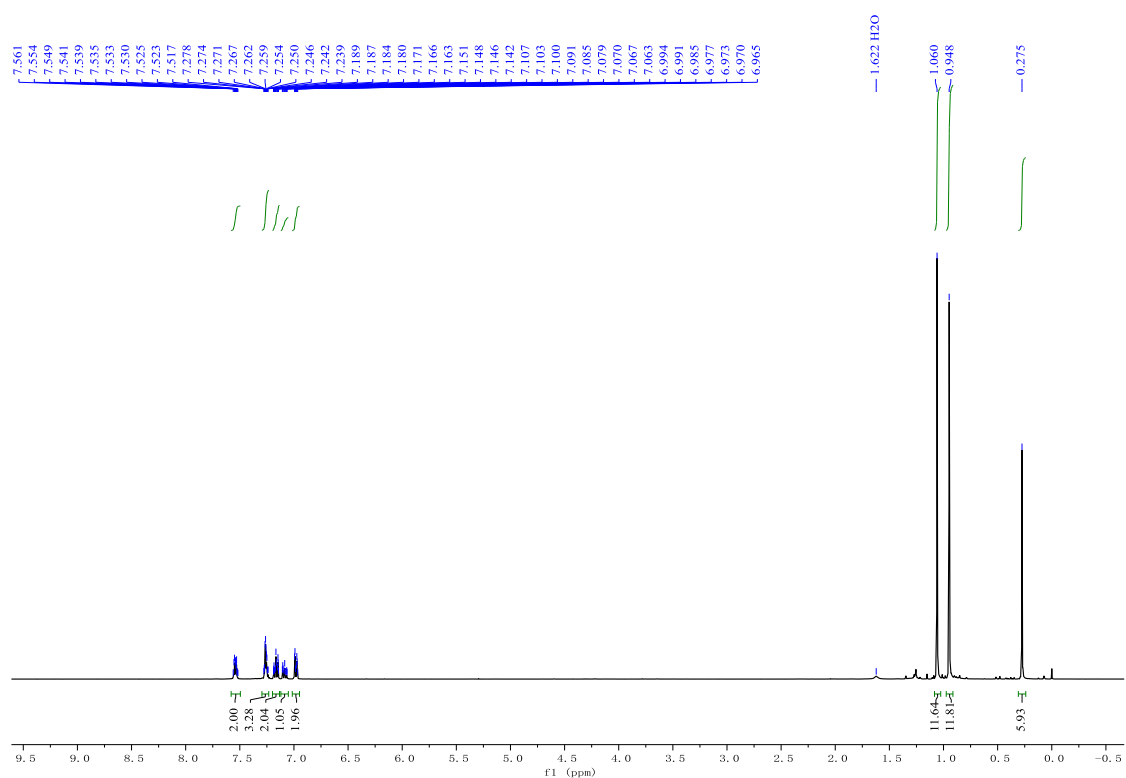

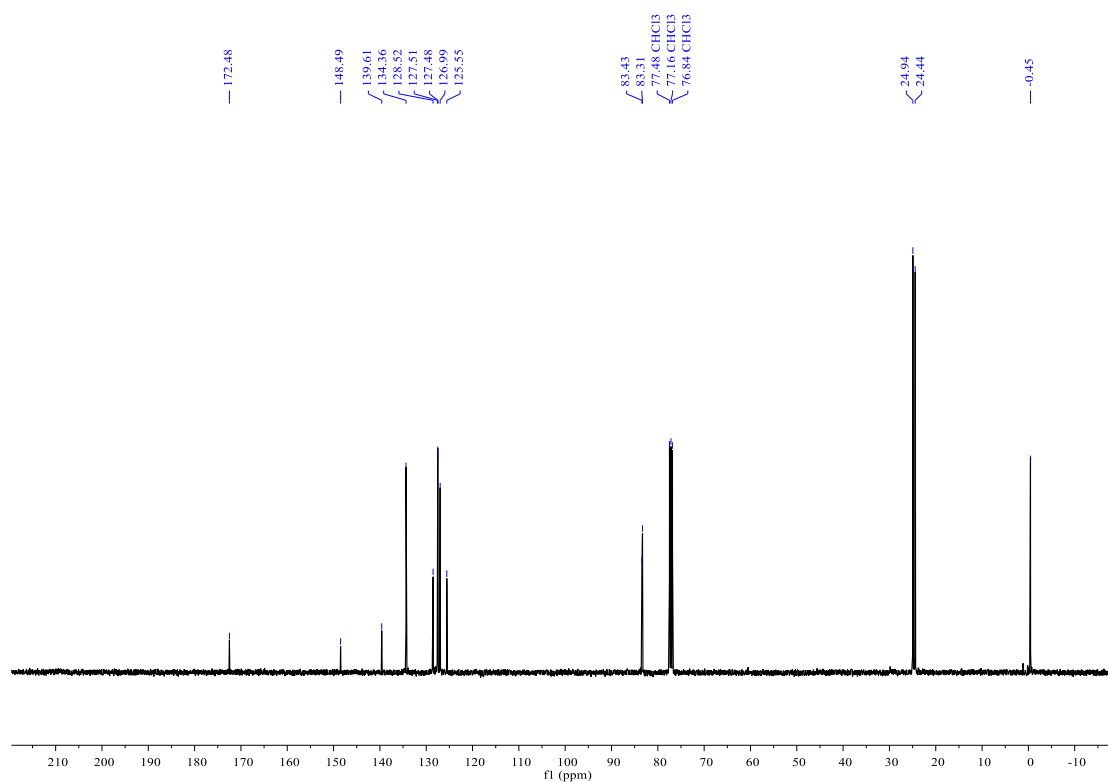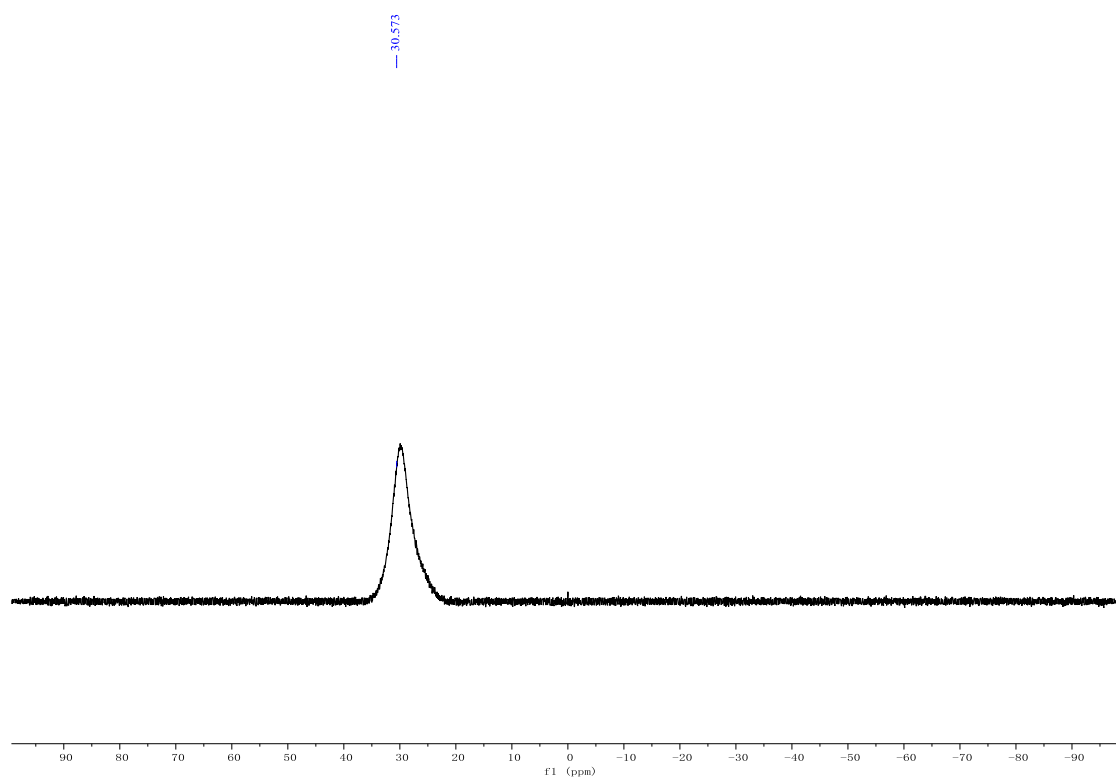



### C. Characterization data and spectrum of products 8

dimethyl(phenyl)((*Z*)-((*Z*)-2-((4,4,5,5-tetramethyl-1,3,2-dioxaborolan-2-yl)methylene)cyclopentylidene)methyl)silane (8v)

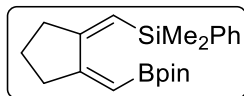

This compound was prepared by the general procedure A described above and was obtained as colorless oil in 43% yield by preparative HPLC (30.3 mg).  $R_f = 0.49$  (Petroleum ether:EtOAc= 95:5).

**$^1\text{H}$  NMR** (400 MHz, Chloroform-*d*)  $\delta$  7.55 – 7.49 (m, 2H), 7.34 – 7.30 (m, 3H), 5.62 (t,  $J = 1.7$  Hz, 1H), 5.23 (t, 1H), 2.43 (dtd,  $J = 17.7, 7.6, 1.7$  Hz, 4H), 1.71 (p,  $J = 7.8$  Hz, 2H), 1.16 (s, 12H), 0.35 (s, 6H).

**$^{13}\text{C}$  NMR** (101 MHz, Chloroform-*d*)  $\delta$  163.93, 158.19, 141.37, 133.91, 128.53, 127.69, 124.12, 83.00, 37.19, 36.15, 24.85, 20.24, -0.63.

**$^{11}\text{B}$  NMR** (128 MHz, Chloroform-*d*)  $\delta$  29.21.

**HRMS** (ESI)  $m/z$  calculated for  $\text{C}_{21}\text{H}_{31}\text{BO}_2\text{SiNa}$   $[\text{M}+\text{Na}]^+$ : 377.2084, found: 377.2084.

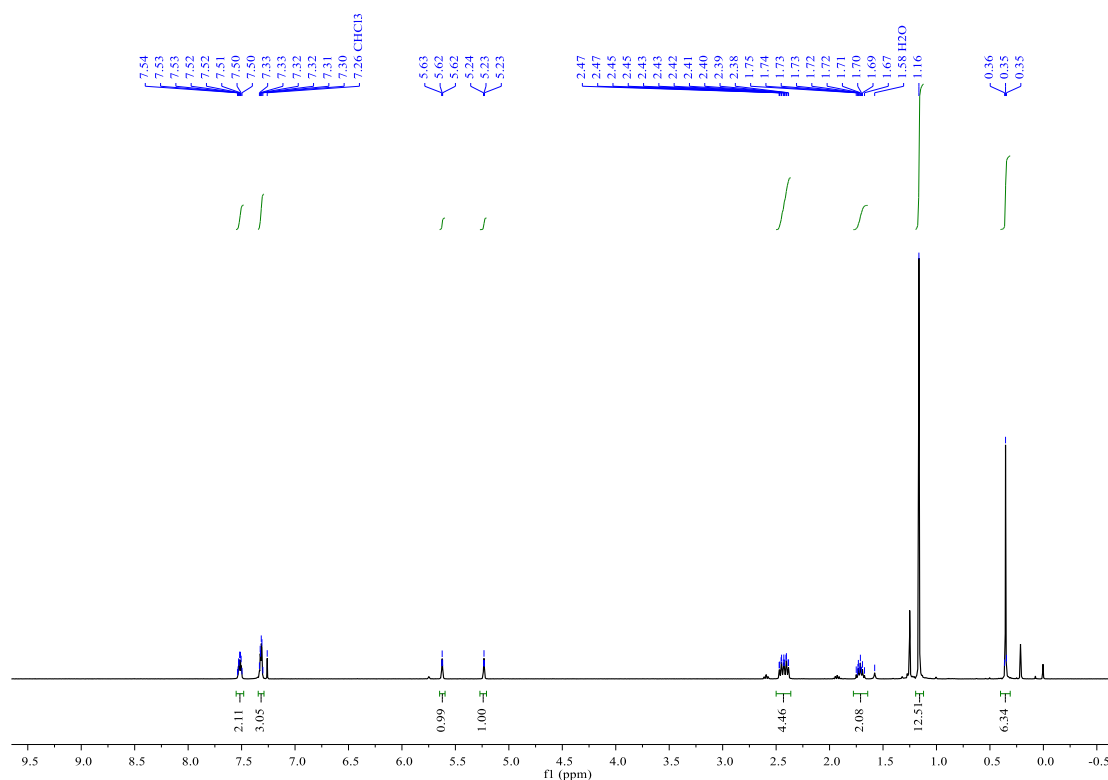

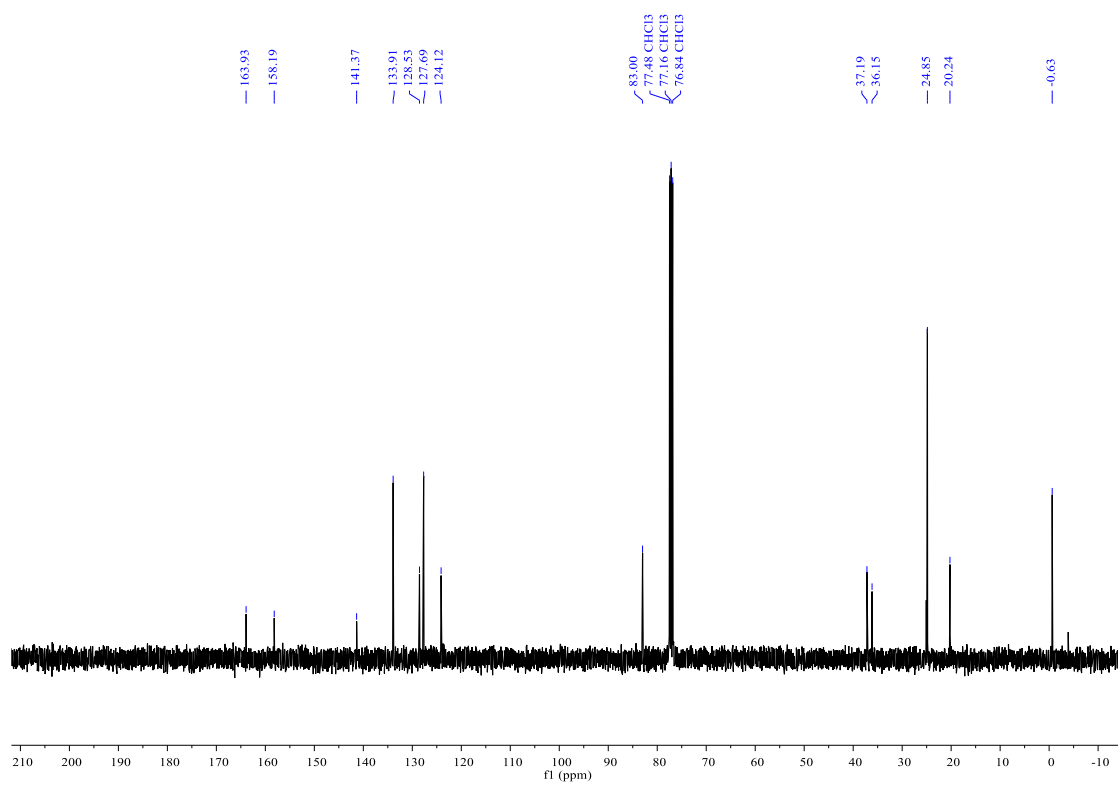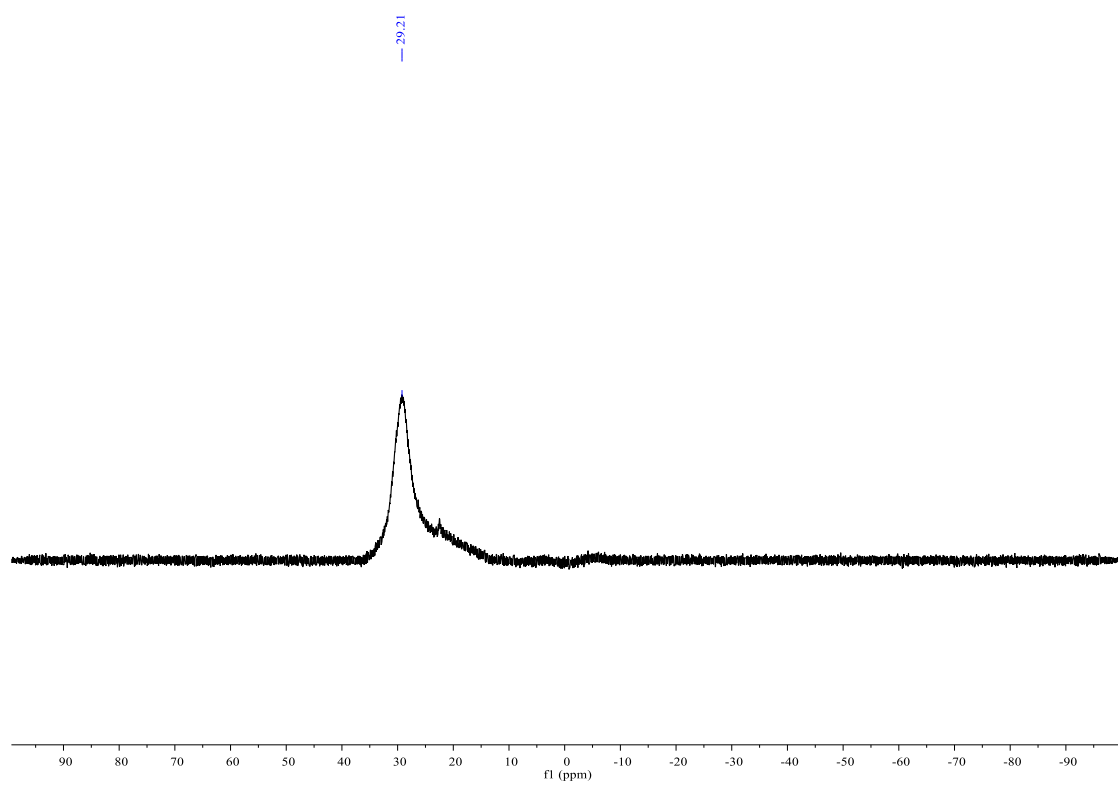

**dimethyl(phenyl)((Z)-((Z)-2-((4,4,5,5-tetramethyl-1,3,2-dioxaborolan-2-yl)methylene)cyclohexylidene)methyl)silane (8w)**

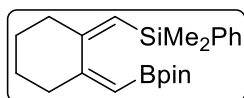

This compound was prepared by the general procedure A described above and was obtained as colorless oil in 70% yield by preparative HPLC (52.2 mg).  $R_f = 0.50$  (Petroleum ether:EtOAc = 95:5).

**$^1\text{H}$  NMR** (400 MHz, Chloroform- $d$ )  $\delta$  7.58 – 7.49 (m, 2H), 7.35 – 7.28 (m, 3H), 5.35 (d,  $J = 1.3$  Hz, 1H), 5.08 (d,  $J = 1.3$  Hz, 1H), 2.49 – 2.39 (m, 1H), 2.32 (tdd,  $J = 11.8, 4.1, 1.7$  Hz, 2H), 2.11 (tdd,  $J = 11.9, 4.4, 1.6$  Hz, 1H), 1.95 – 1.85 (m, 2H), 1.53 (d,  $J = 12.1$  Hz, 2H), 1.19 (s, 12H), 0.34 (s, 3H), 0.29 (s, 3H).

**$^{13}\text{C}$  NMR** (101 MHz, Chloroform- $d$ )  $\delta$  166.75, 162.06, 141.11, 133.97, 128.53, 127.63, 119.19, 82.74, 44.35, 43.26, 30.14, 30.07, 25.24, 24.67, -0.29, -0.46.

**$^{11}\text{B}$  NMR** (128 MHz, Chloroform- $d$ )  $\delta$  29.44.

**HRMS** (ESI)  $m/z$  calculated for  $\text{C}_{22}\text{H}_{33}\text{BO}_2\text{SiNa}$   $[\text{M}+\text{Na}]^+$ : 391.2241, found: 391.2243.

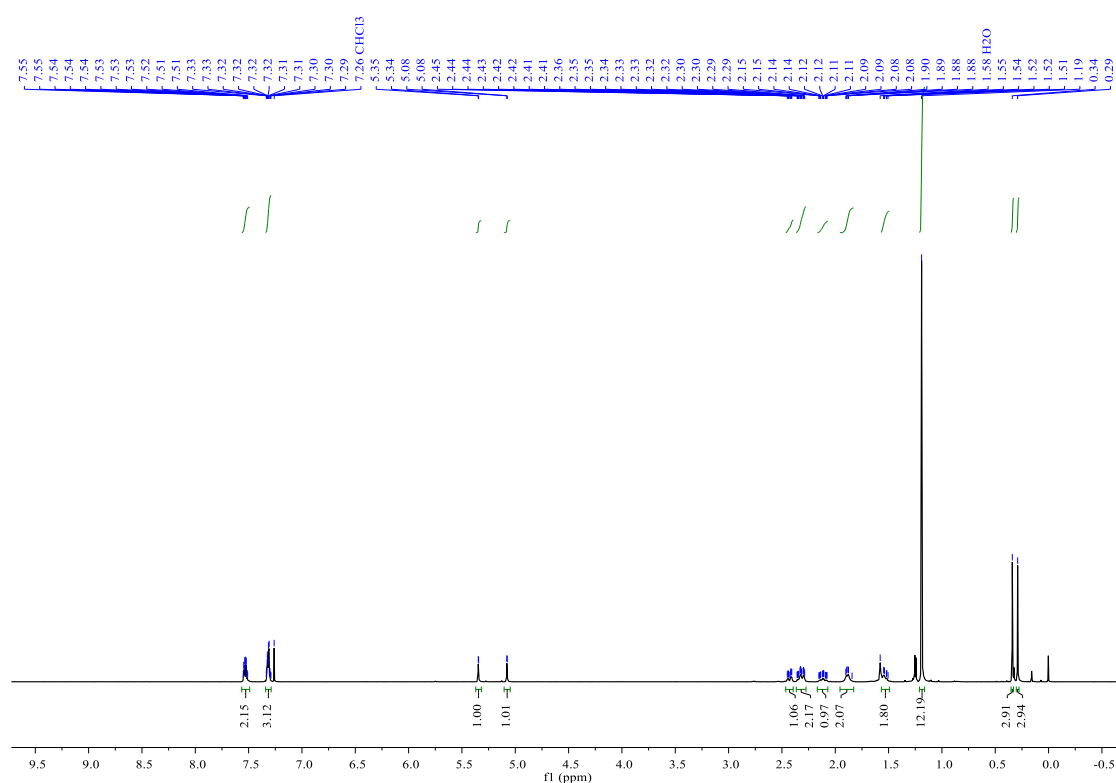

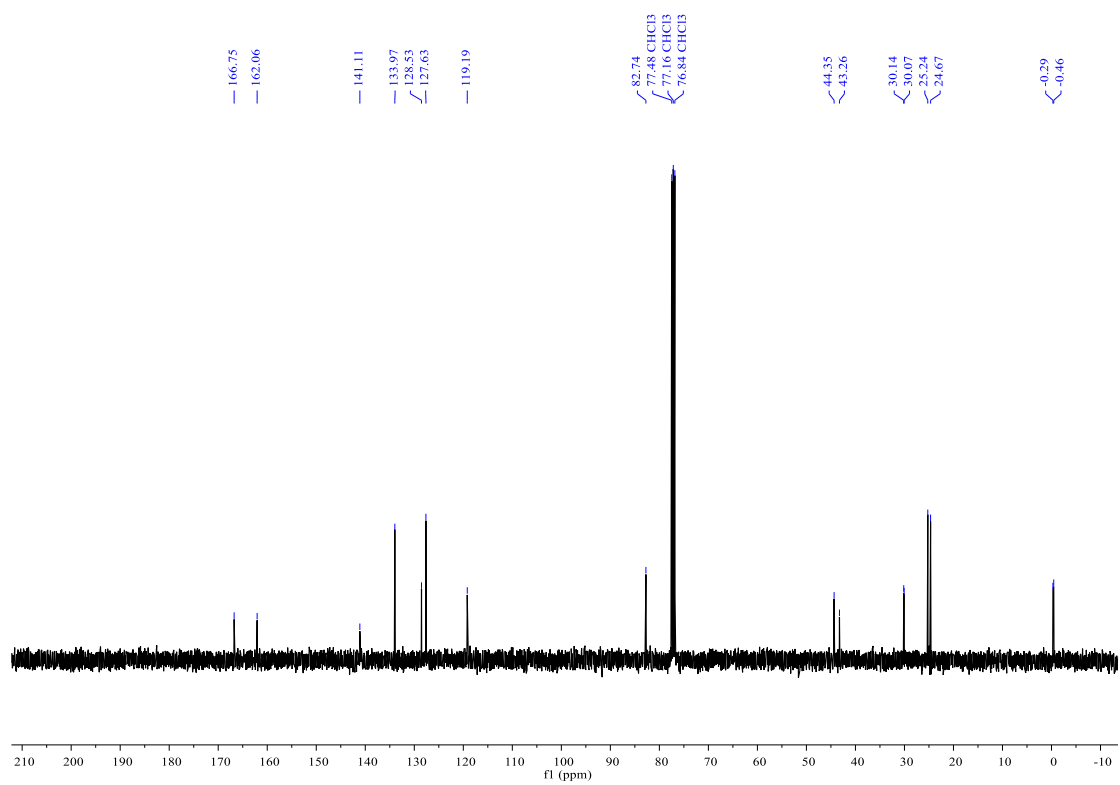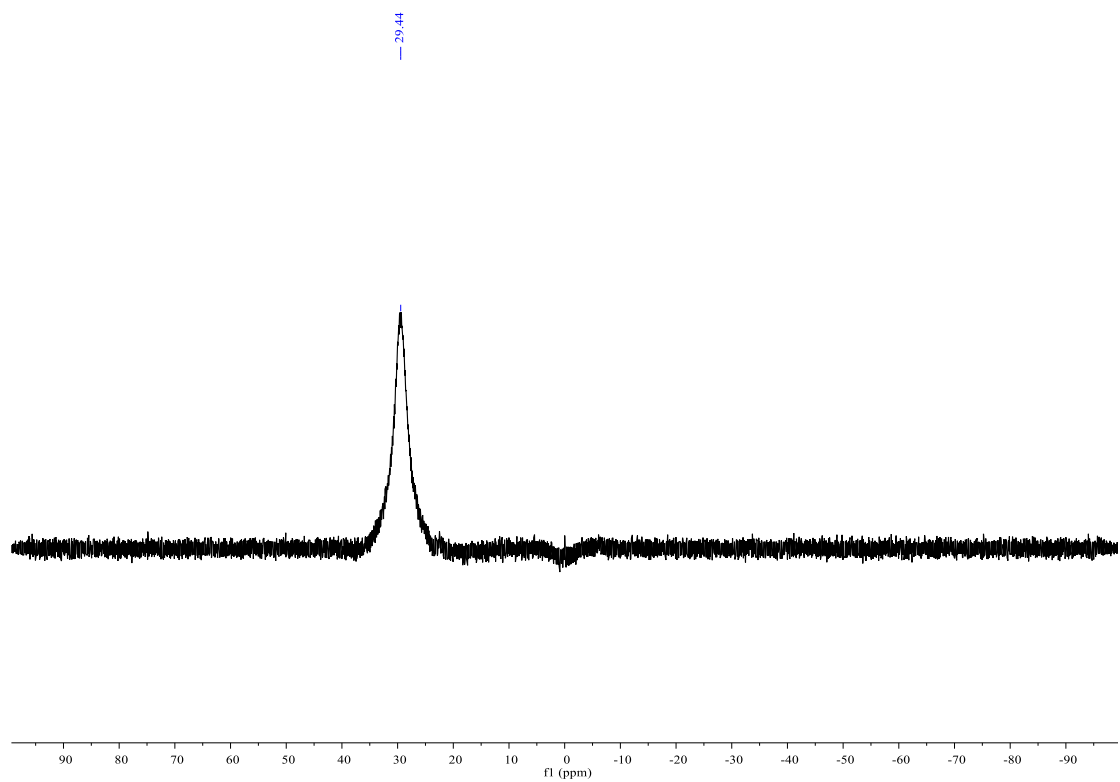

## E. Characterization data and spectrum of products 4

### (Z)-dimethyl(phenyl)(1-(4,4,5,5-tetramethyl-1,3,2-dioxaborolan-2-yl)oct-1-en-2-yl)silane (4a).

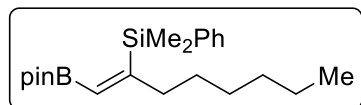

This compound was prepared by the general procedure B described above and was obtained as colorless oil in 71% yield (52.9 mg).  $R_f = 0.58$  (Petroleum ether:Et<sub>2</sub>O= 96:4).

**<sup>1</sup>H NMR** (400 MHz, Chloroform-*d*)  $\delta$  7.55 – 7.52 (m, 2H), 7.31 – 7.28 (m, 3H), 6.19 (t,  $J = 1.4$  Hz, 1H), 2.22 (ddd,  $J = 9.4, 5.7, 1.4$  Hz, 2H), 1.38 – 1.31 (m, 2H), 1.29 – 1.18 (m, 6H), 1.07 (s, 12H), 0.86 (t,  $J = 7.0$  Hz, 3H), 0.45 (s, 6H).

**<sup>13</sup>C NMR** (101 MHz, Chloroform-*d*)  $\delta$  166.80, 140.62, 134.14, 128.46, 127.50, 83.17, 42.81, 31.82, 29.79, 29.29, 24.81, 22.71, 14.23, -0.70.

**<sup>11</sup>B NMR** (128 MHz, Chloroform-*d*)  $\delta$  29.04.

**HRMS** (ESI)  $m/z$  calculated for C<sub>22</sub>H<sub>37</sub>BO<sub>2</sub>SiNa [M+Na]<sup>+</sup>: 395.2554, found: 395.2570.

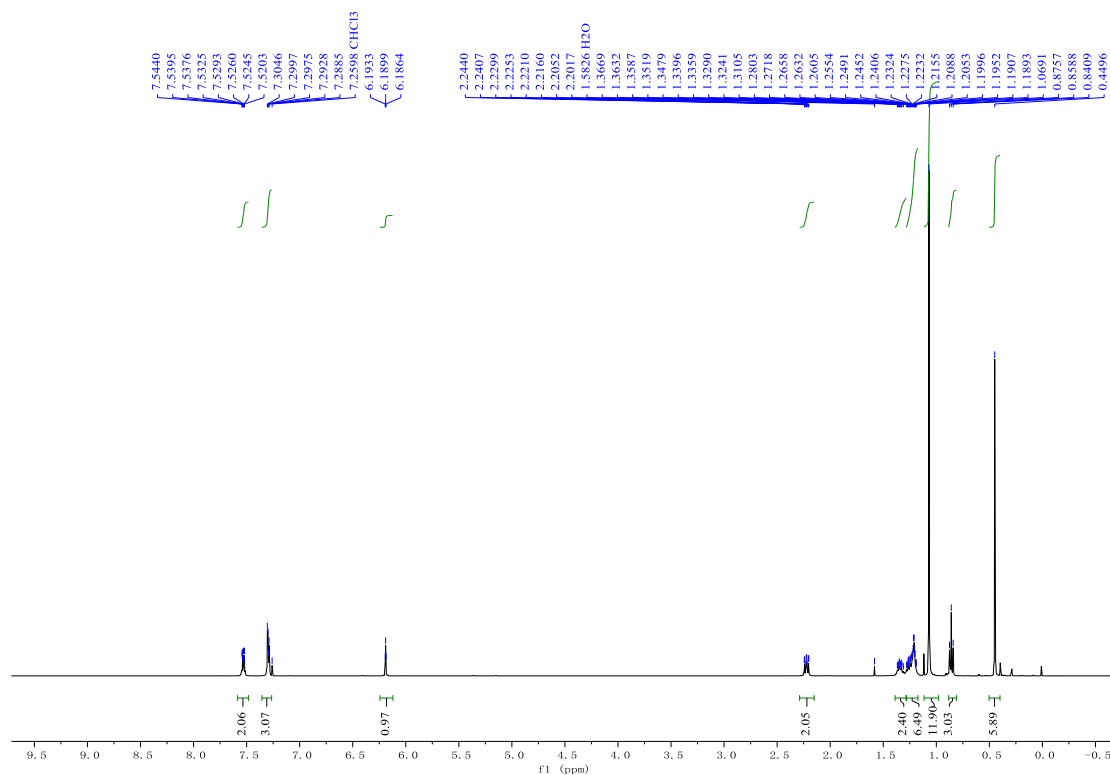

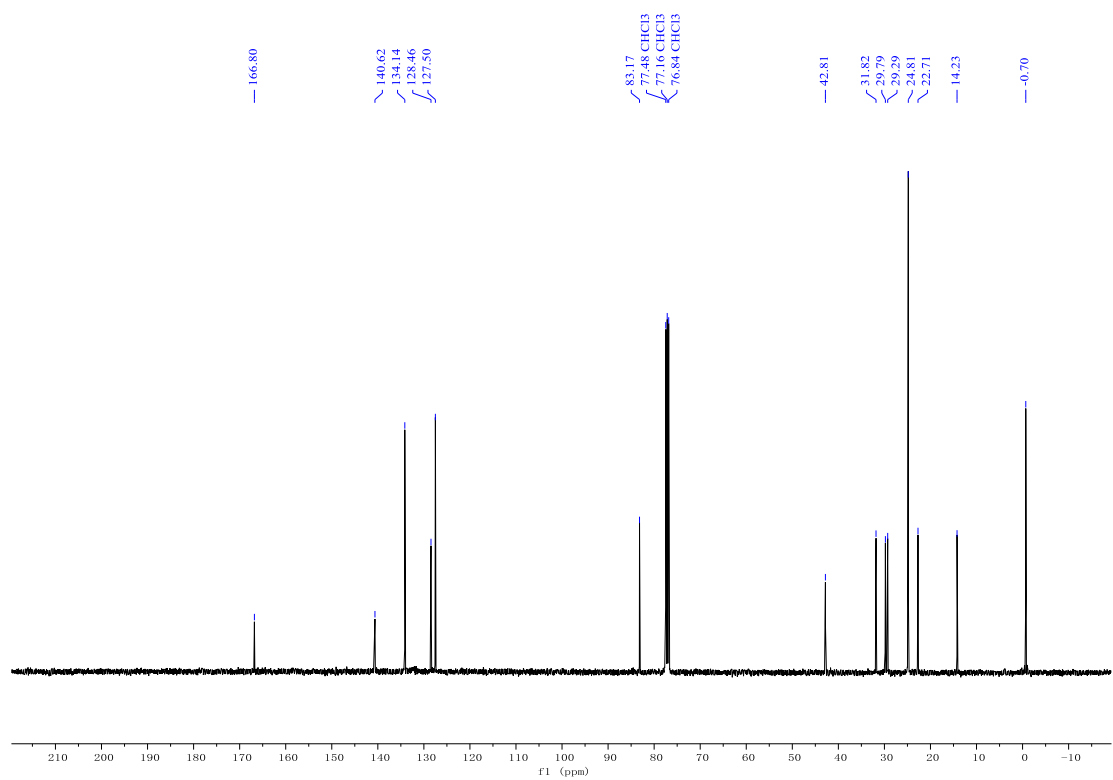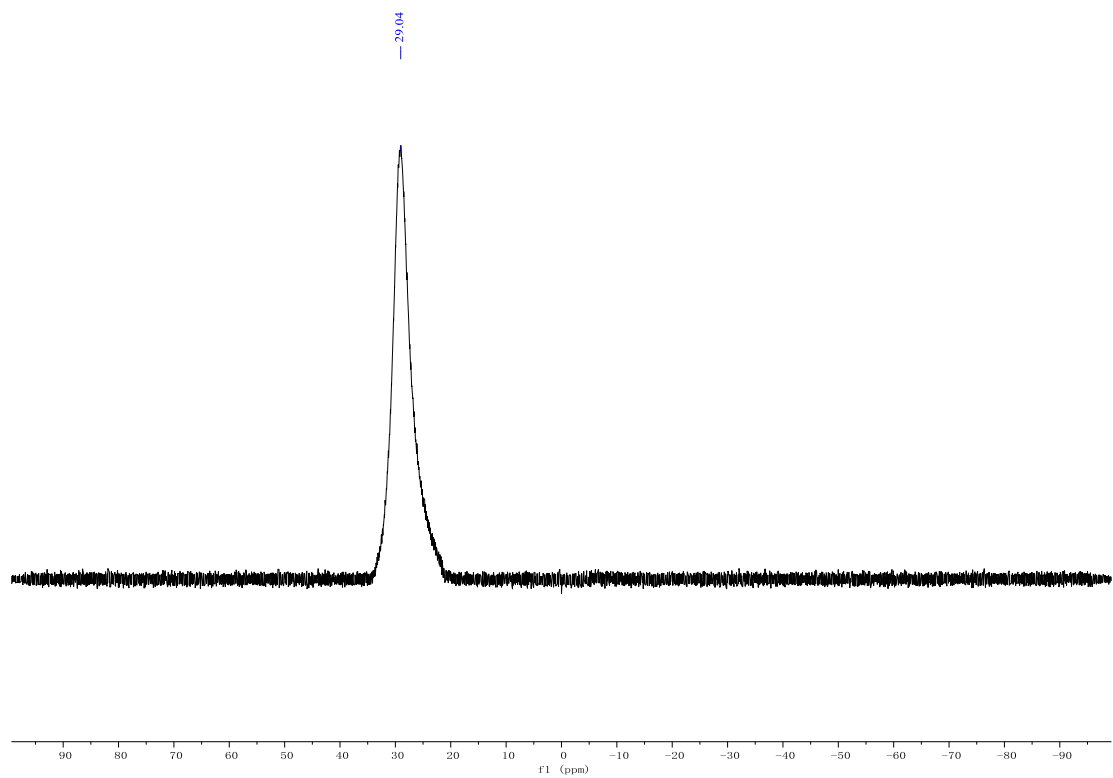

**(Z)-dimethyl(phenyl)(1-(4,4,5,5-tetramethyl-1,3,2-dioxaborolan-2-yl)hex-1-en-2-yl)silane (4b).**

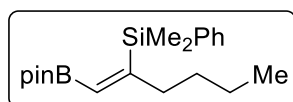

This compound was prepared by the general procedure B described above and was obtained as colorless oil in 65% yield (44.8 mg).  $R_f = 0.54$  (Petroleum ether:EtOAc= 98:2).

$^1\text{H NMR}$  (400 MHz, Chloroform-*d*)  $\delta$  7.57 – 7.51 (m, 2H), 7.33 – 7.27 (m, 3H), 6.19 (t,  $J = 1.4$  Hz, 1H), 2.23 (ddd,  $J = 9.3, 6.2, 1.4$  Hz, 2H), 1.39 – 1.30 (m, 2H), 1.28 – 1.19 (m, 2H), 1.07 (s, 12H), 0.83 (t,  $J = 7.2$  Hz, 3H), 0.45 (s, 6H).

$^{13}\text{C NMR}$  (101 MHz, Chloroform-*d*)  $\delta$  166.68, 140.62, 134.13, 128.45, 127.49, 83.16, 42.44, 31.98, 24.80, 22.63, 14.07, -0.69.

$^{11}\text{B NMR}$  (128 MHz, Chloroform-*d*)  $\delta$  29.03.

**HRMS** (ESI)  $m/z$  calculated for  $\text{C}_{20}\text{H}_{33}\text{BO}_2\text{SiNa}$   $[\text{M}+\text{Na}]^+$ : 367.2241, found: 367.2242.

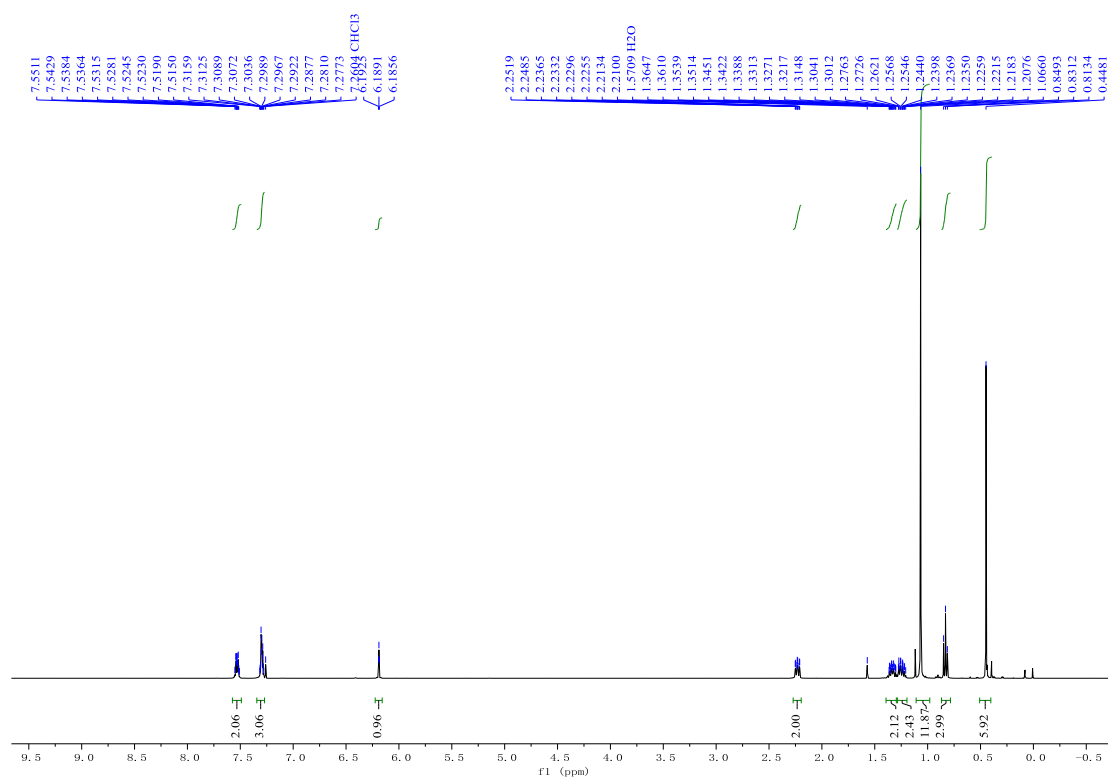

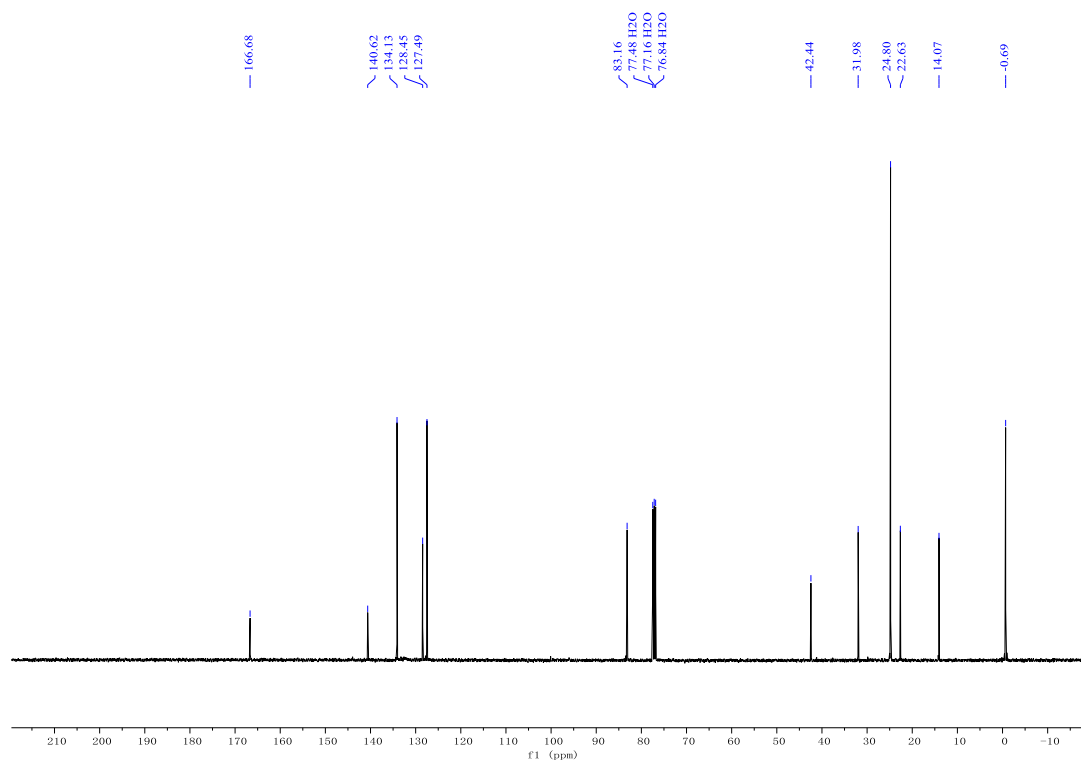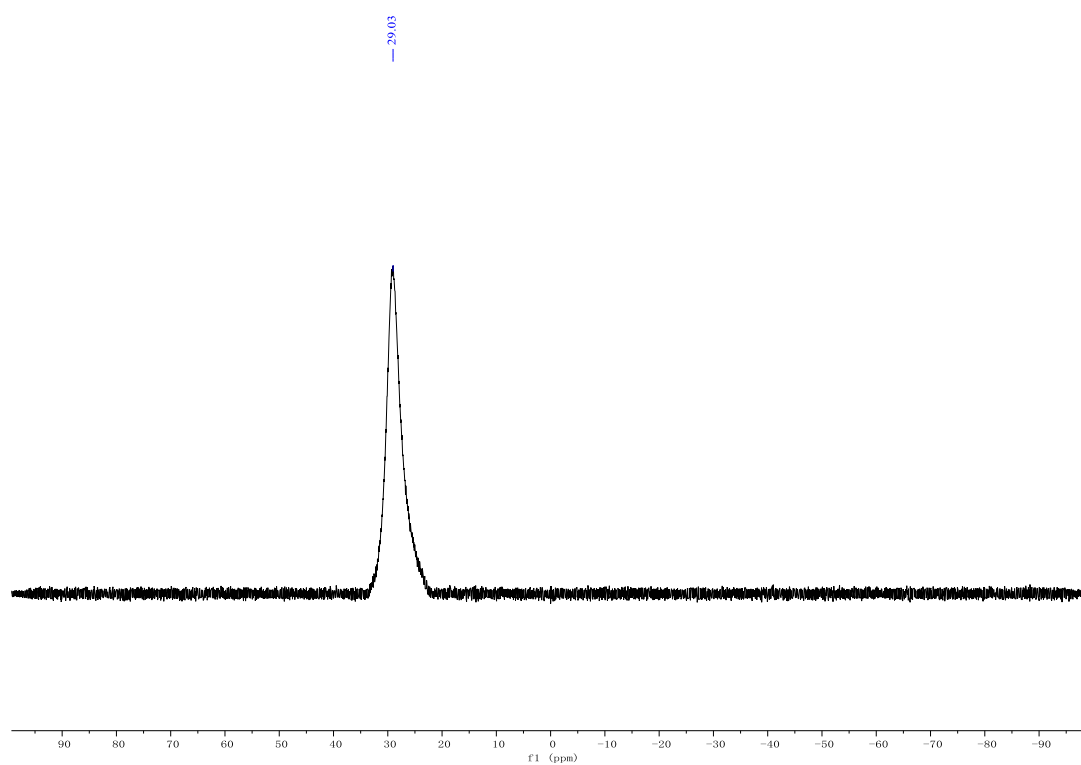



**(Z)-dimethyl(phenyl)(1-(4,4,5,5-tetramethyl-1,3,2-dioxaborolan-2-yl)dec-1-en-2-yl)silane (4c).**

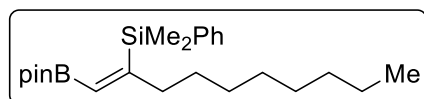

This compound was prepared by the general procedure B described above and was obtained as colorless oil in 68% yield (54.5 mg).  $R_f$  = 0.54 (Petroleum ether:EtOAc = 98:2).

**$^1\text{H}$  NMR** (400 MHz, Chloroform- $d$ )  $\delta$  7.56 – 7.49 (m, 2H), 7.32 – 7.27 (m, 3H), 6.19 (t,  $J$  = 1.4 Hz, 1H), 2.27 – 2.17 (m, 2H), 1.40 – 1.29 (m, 2H), 1.30 – 1.17 (m, 10H), 1.07 (s, 12H), 0.88 (t,  $J$  = 7.0 Hz, 3H), 0.45 (s, 6H).

**$^{13}\text{C}$  NMR** (101 MHz, Chloroform- $d$ )  $\delta$  166.79, 140.62, 134.13, 128.45, 127.49, 83.16, 42.81, 32.02, 29.81, 29.61, 29.55, 29.36, 24.80, 22.82, 14.27, -0.70.

**$^{11}\text{B}$  NMR** (128 MHz, Chloroform- $d$ )  $\delta$  28.94.

**HRMS** (ESI)  $m/z$  calculated for  $\text{C}_{24}\text{H}_{41}\text{BO}_2\text{SiNa}$   $[\text{M}+\text{Na}]^+$ : 423.2867, found: 423.2882.

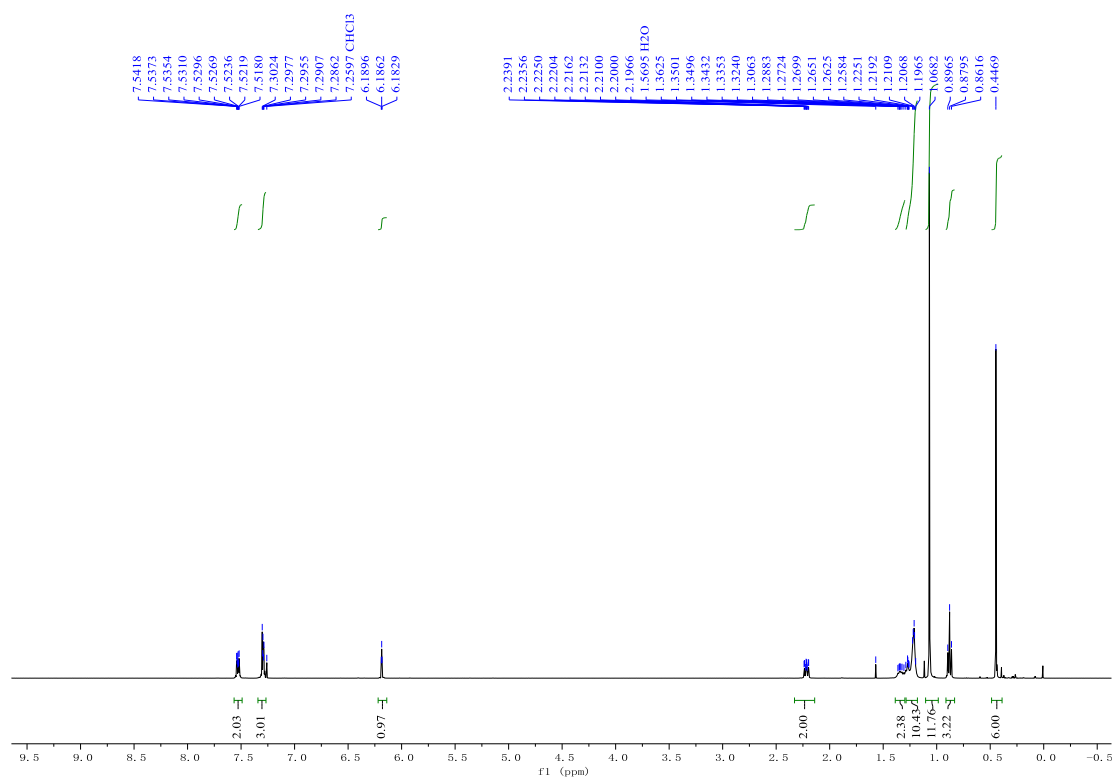

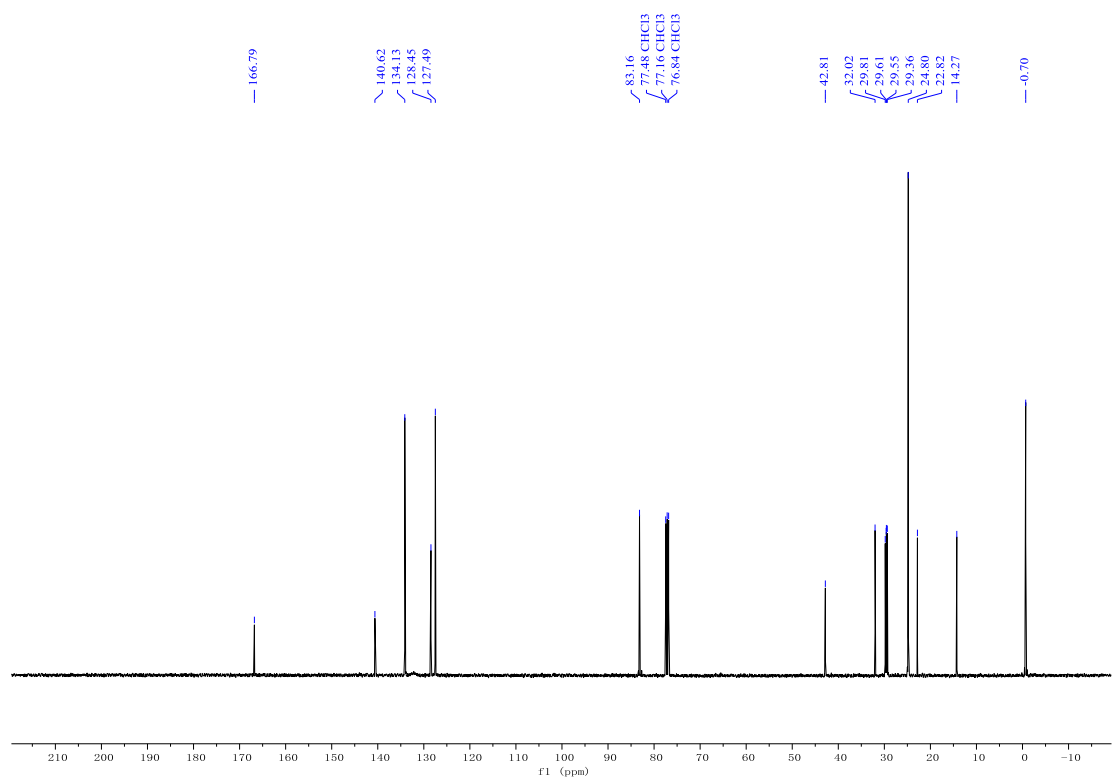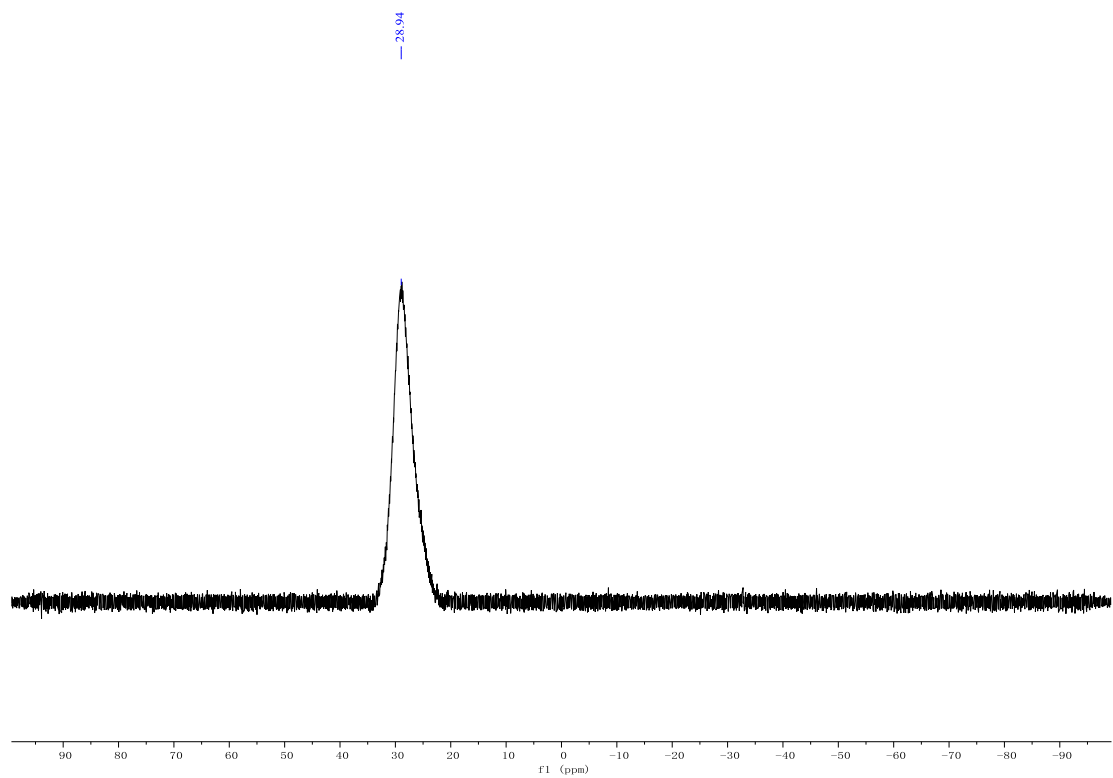

**(Z)-dimethyl(phenyl)(5-phenyl-1-(4,4,5,5-tetramethyl-1,3,2-dioxaborolan-2-yl)pent-1-en-2-yl) silane (4e).**

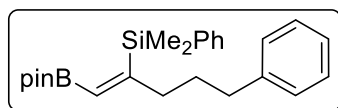

This compound was prepared by the general procedure B described above and was obtained as colorless oil in 75% yield (61.0 mg).  $R_f$  = 0.42 (Petroleum ether:EtOAc= 98:2).

$^1\text{H}$  NMR (400 MHz, Chloroform- $d$ )  $\delta$  7.55 – 7.50 (m, 2H), 7.32 – 7.27 (m, 3H), 7.26 – 7.21 (m, 2H), 7.18 – 7.12 (m, 1H), 7.10 – 7.06 (m, 2H), 6.20 (t,  $J$  = 1.4 Hz, 1H), 2.53 – 2.47 (m, 2H), 2.26 (ddd,  $J$  = 9.3, 6.2, 1.4 Hz, 2H), 1.71 – 1.61 (m, 2H), 1.07 (s, 12H), 0.43 (s, 6H).

$^{13}\text{C}$  NMR (101 MHz, Chloroform- $d$ )  $\delta$  166.15, 142.58, 140.41, 134.14, 128.53, 128.33, 127.55, 125.71, 83.22, 42.47, 35.86, 31.53, 24.81, -0.77.

$^{11}\text{B}$  NMR (128 MHz, Chloroform- $d$ )  $\delta$  28.87.

HRMS (ESI)  $m/z$  calculated for  $\text{C}_{25}\text{H}_{35}\text{BO}_2\text{SiNa}$   $[\text{M}+\text{Na}]^+$ : 429.2397, found: 429.2396.

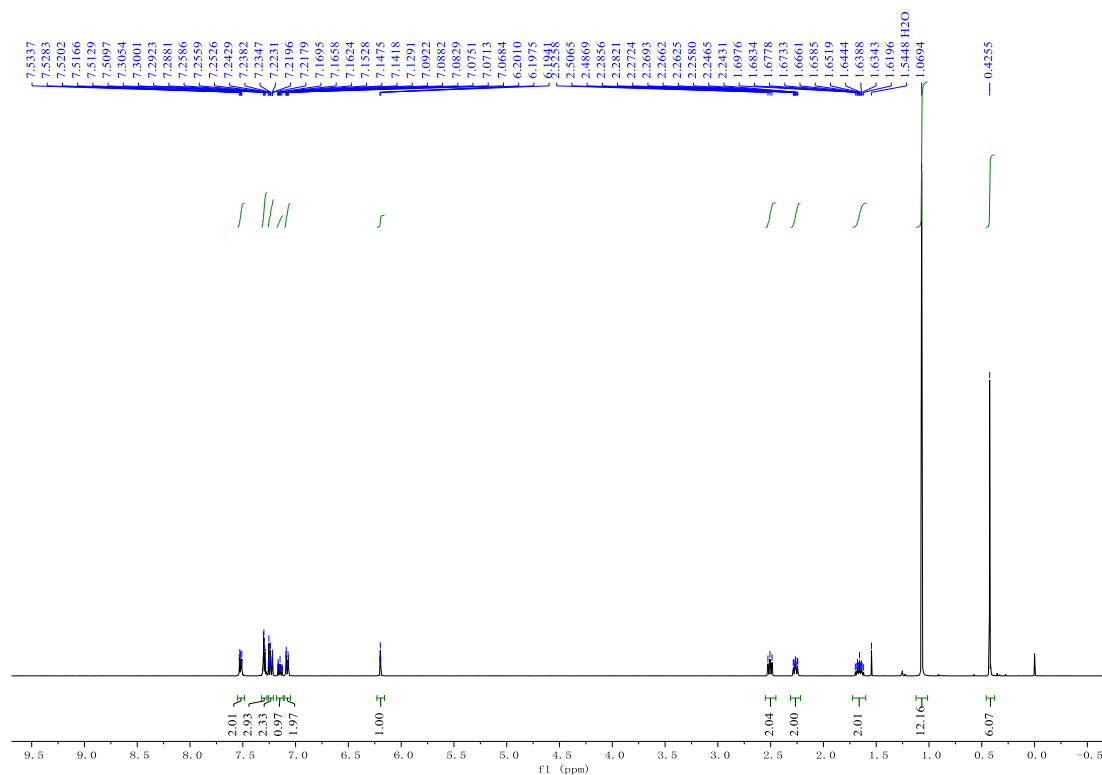

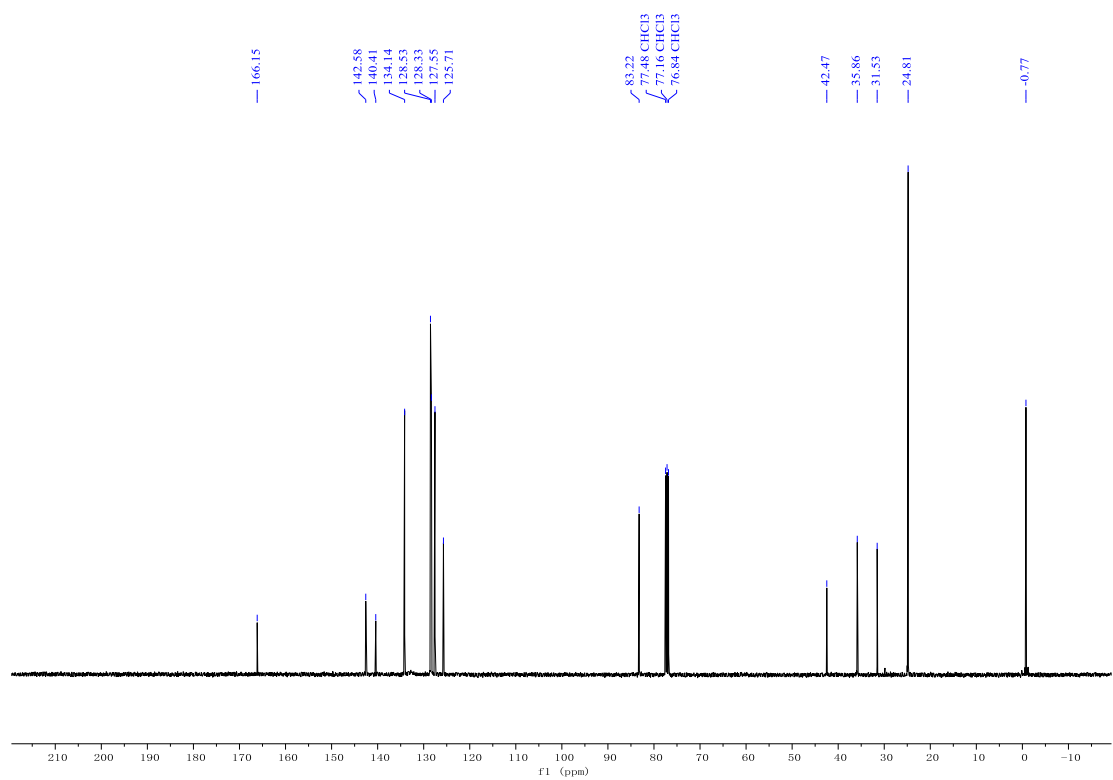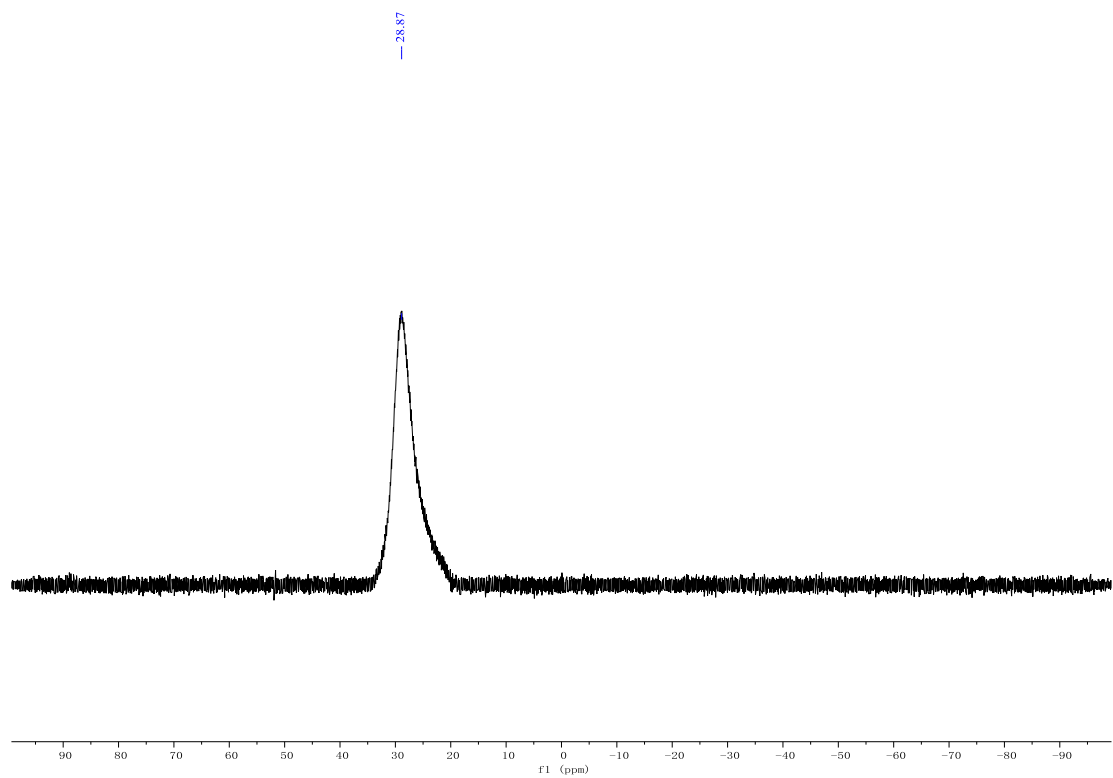

**(Z)-4-(dimethyl(phenyl)silyl)-5-(4,4,5,5-tetramethyl-1,3,2-dioxaborolan-2-yl)pent-4-en-1-yl acetate (4f).**

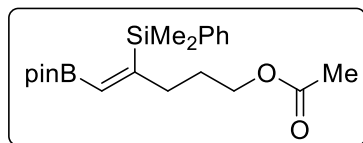

This compound was prepared by the general procedure B described above and was obtained as colorless oil in 54% yield (42.2 mg).  $R_f = 0.13$  (Petroleum ether:EtOAc= 98:2).

**$^1\text{H}$  NMR** (400 MHz, Chloroform- $d$ )  $\delta$  7.57 – 7.46 (m, 2H), 7.34 – 7.25 (m, 3H), 6.20 (t,  $J = 1.4$  Hz, 1H), 3.97 (t,  $J = 6.6$  Hz, 2H), 2.33 – 2.20 (m, 2H), 2.00 (s, 3H), 1.74 – 1.59 (m, 2H), 1.08 (s, 12H), 0.45 (s, 6H).

**$^{13}\text{C}$  NMR** (101 MHz, Chloroform- $d$ )  $\delta$  171.21, 164.87, 140.09, 134.08, 128.62, 127.59, 83.30, 64.18, 38.61, 28.48, 24.81, 21.07, -0.82.

**$^{11}\text{B}$  NMR** (128 MHz, Chloroform- $d$ )  $\delta$  29.03.

**HRMS** (ESI)  $m/z$  calculated for  $\text{C}_{21}\text{H}_{33}\text{BO}_4\text{SiNa}$   $[\text{M}+\text{Na}]^+$ : 411.2139, found: 411.2138.

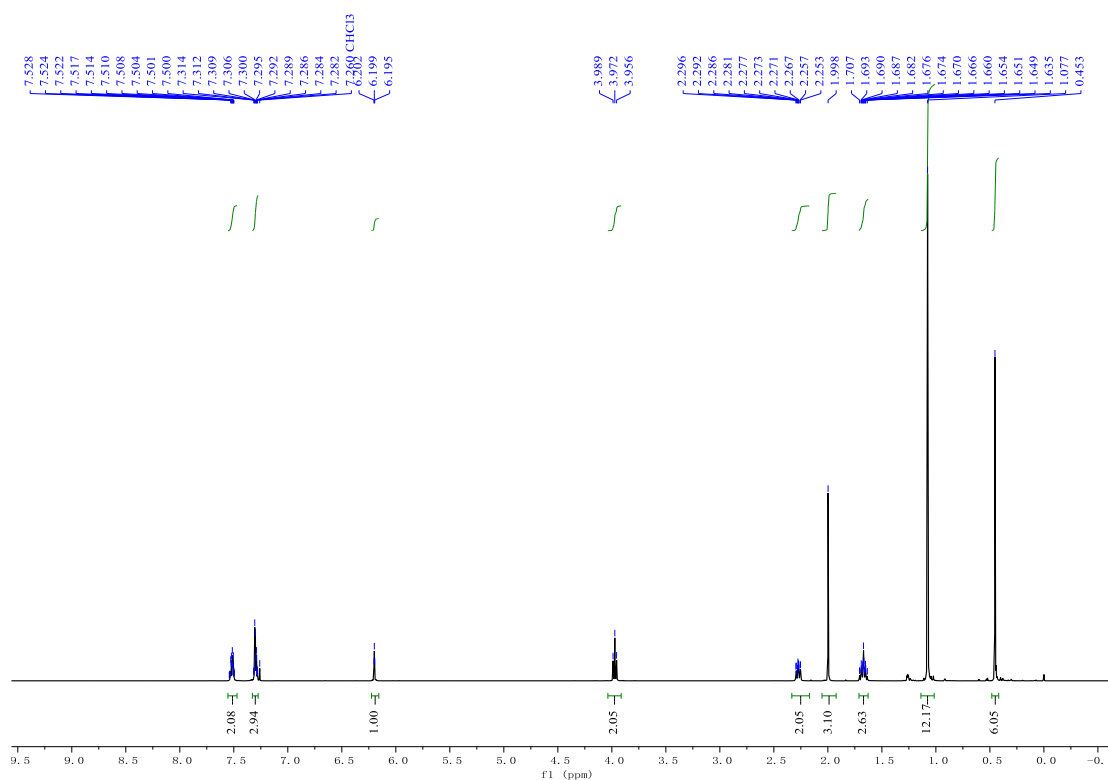

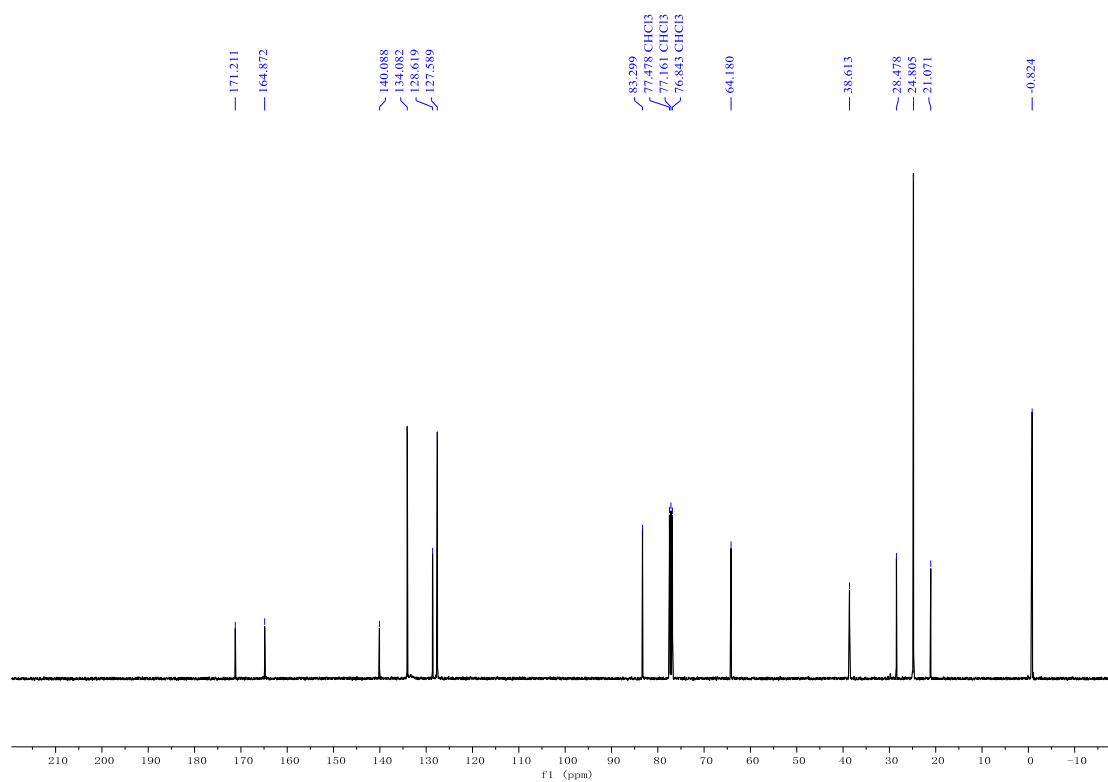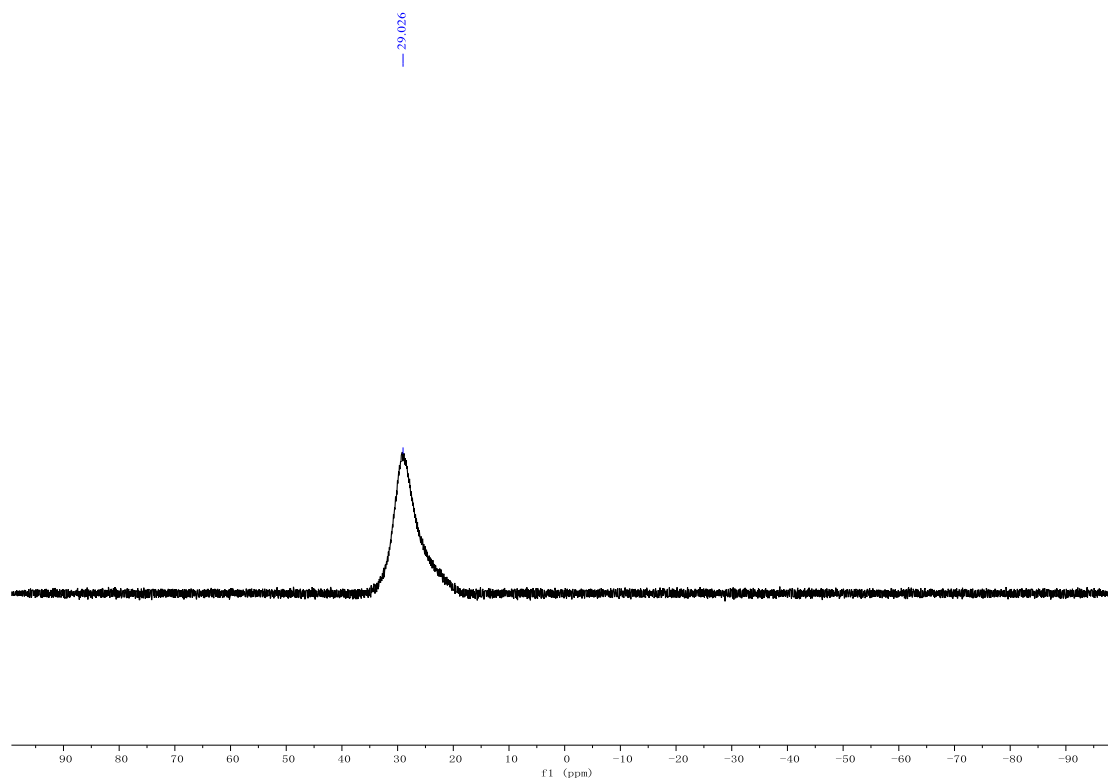

**methyl (Z)-5-(dimethyl(phenyl)silyl)-6-(4,4,5,5-tetramethyl-1,3,2-dioxaborolan-2-yl)hex-5-enoate (4g).**

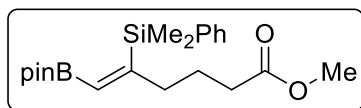

This compound was prepared by the general procedure B described above and was obtained as colorless oil in 62% yield (48.1 mg).  $R_f = 0.32$  (Petroleum ether:EtOAc = 95:5).

**$^1\text{H}$  NMR** (400 MHz, Chloroform- $d$ )  $\delta$  7.55 – 7.48 (m, 2H), 7.33 – 7.26 (m, 3H), 6.19 (t,  $J = 1.4$  Hz, 1H), 3.63 (s, 3H), 2.29 – 2.18 (m, 4H), 1.75 – 1.62 (m, 2H), 1.07 (s, 12H), 0.45 (s, 6H).

**$^{13}\text{C}$  NMR** (101 MHz, Chloroform- $d$ )  $\delta$  174.03, 164.98, 140.19, 134.08, 128.56, 127.56, 83.26, 51.54, 41.72, 33.75, 24.80, 24.75, -0.82.

**$^{11}\text{B}$  NMR** (128 MHz, Chloroform- $d$ )  $\delta$  28.87.

**HRMS** (ESI)  $m/z$  calculated for  $\text{C}_{21}\text{H}_{33}\text{BO}_4\text{SiNa}$   $[\text{M}+\text{Na}]^+$ : 411.2139, found: 411.2131.

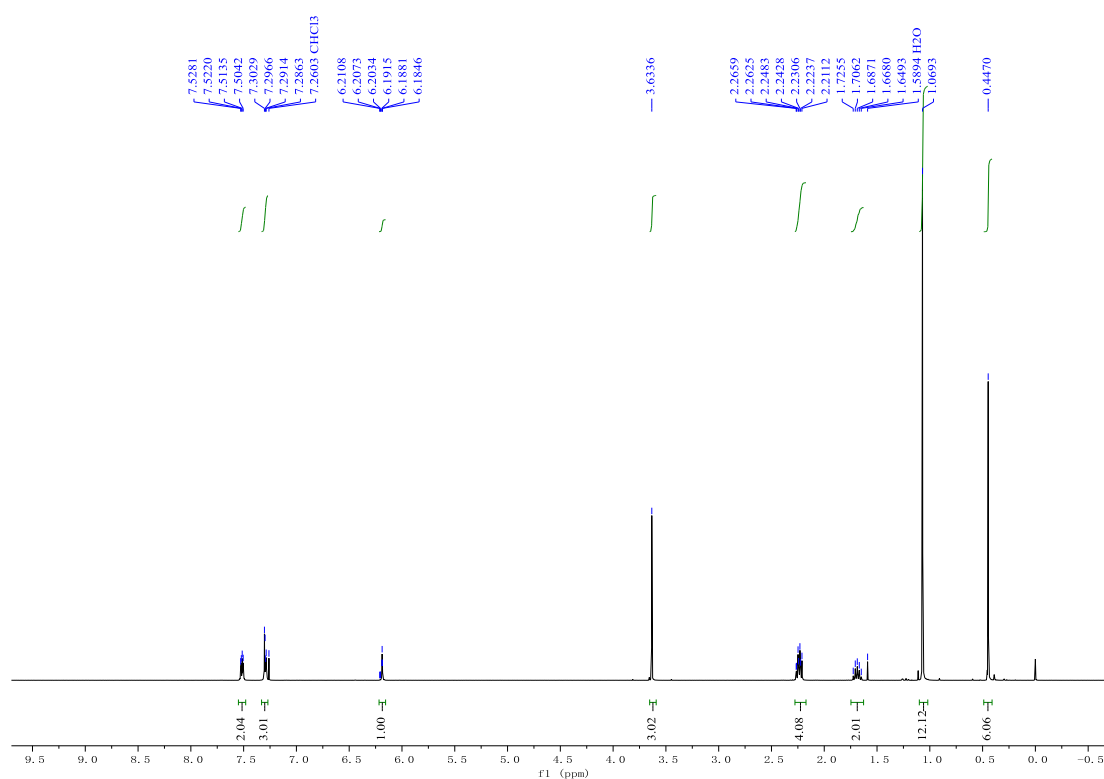

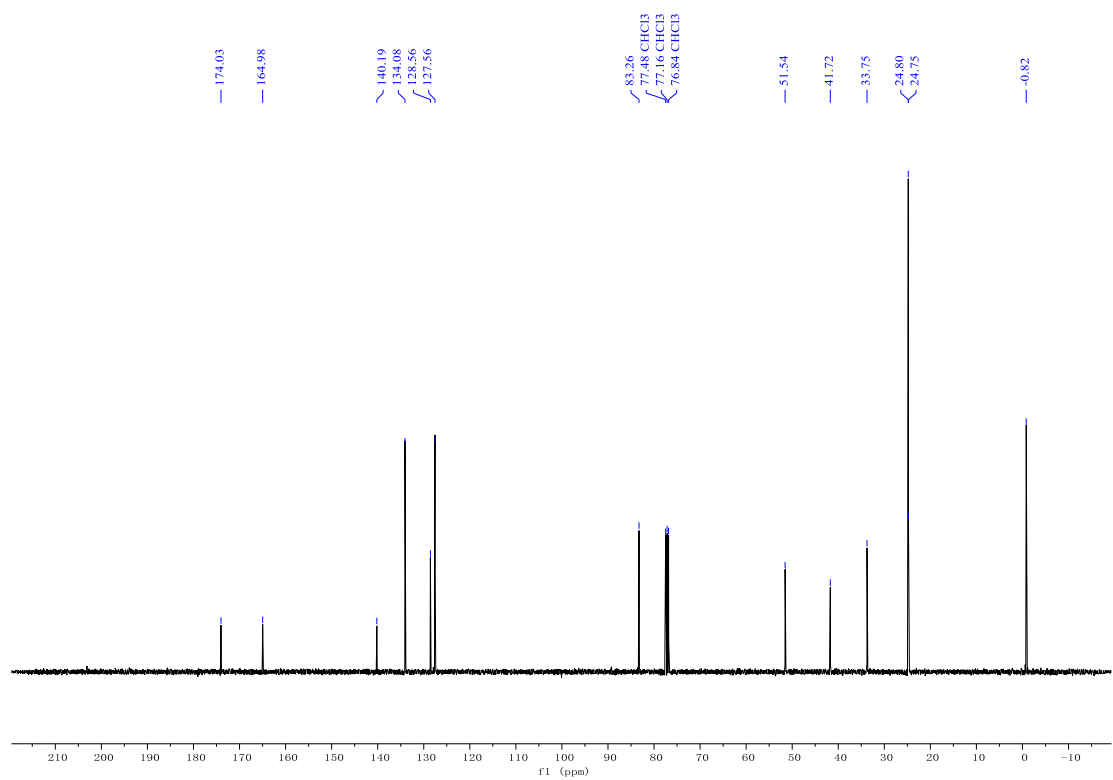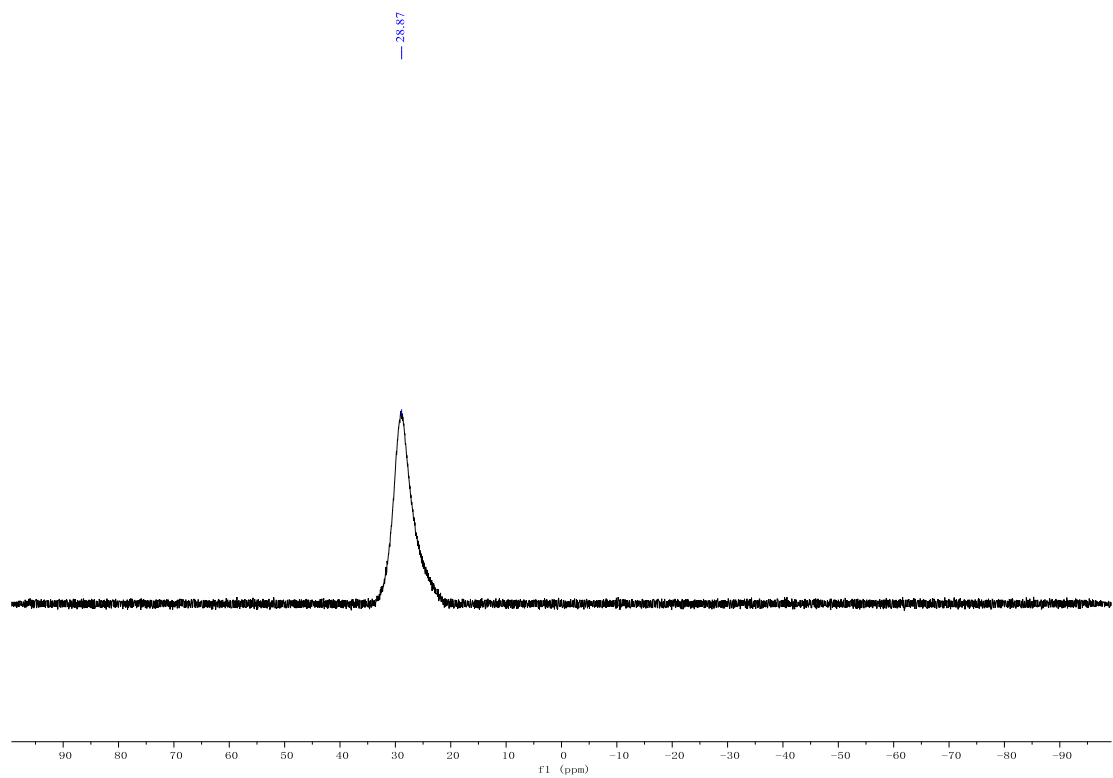



**(Z)-4-(dimethyl(phenyl)silyl)-1-phenyl-5-(4,4,5,5-tetramethyl-1,3,2-dioxaborolan-2-yl)pent-4-en-1-one (4h).**

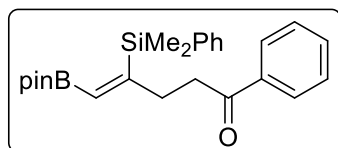

This compound was prepared by the general procedure B described above and was obtained as colorless oil in 55% yield (46.2 mg).  $R_f$  = 0.24 (Petroleum ether:EtOAc = 98:2).

**$^1\text{H}$  NMR** (400 MHz, Chloroform- $d$ )  $\delta$  7.87 – 7.82 (m, 2H), 7.59 – 7.50 (m, 3H), 7.46 – 7.38 (m, 2H), 7.35 – 7.29 (m, 3H), 6.25 (t,  $J$  = 1.5 Hz, 1H), 3.07 – 2.94 (m, 2H), 2.69 – 2.62 (m, 2H), 1.10 (s, 12H), 0.50 (s, 6H).

**$^{13}\text{C}$  NMR** (101 MHz, Chloroform- $d$ )  $\delta$  199.64, 164.58, 139.97, 136.97, 134.15, 133.02, 128.75, 128.66, 128.18, 127.72, 83.41, 38.38, 36.21, 24.86, -0.84.

**$^{11}\text{B}$  NMR** (128 MHz, Chloroform- $d$ )  $\delta$  29.81.

**HRMS** (ESI)  $m/z$  calculated for  $\text{C}_{25}\text{H}_{33}\text{BO}_3\text{SiNa}$   $[\text{M}+\text{Na}]^+$ : 443.2190, found: 443.2178.

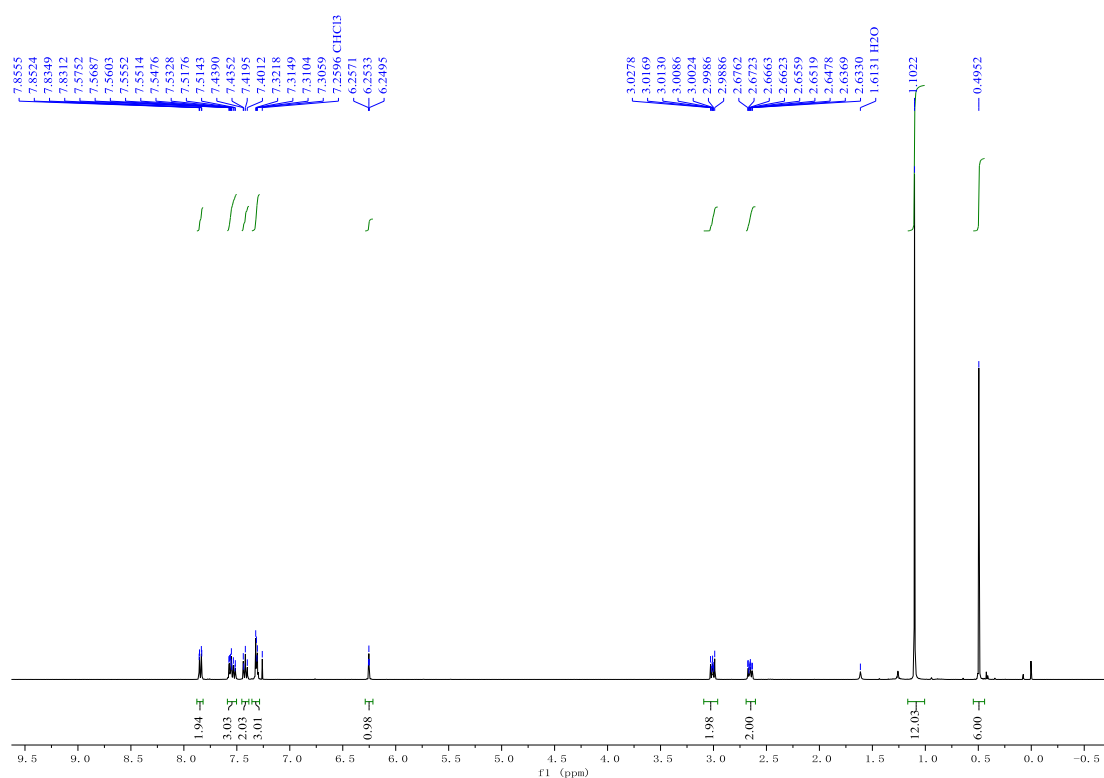

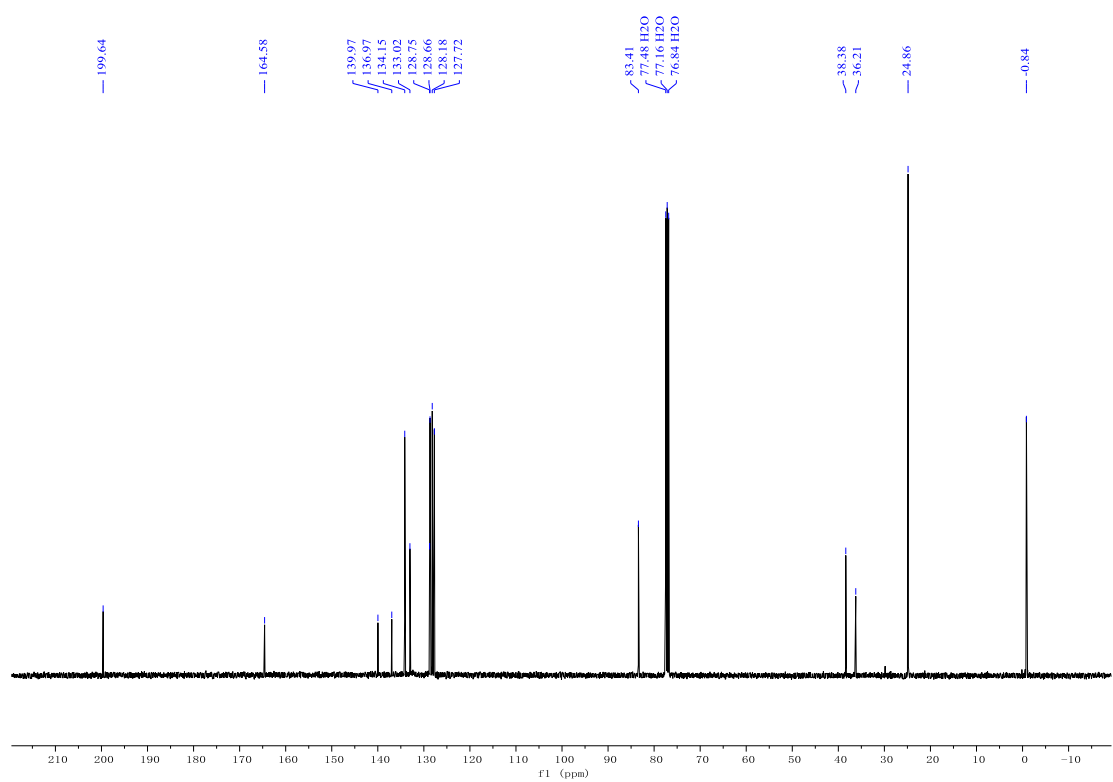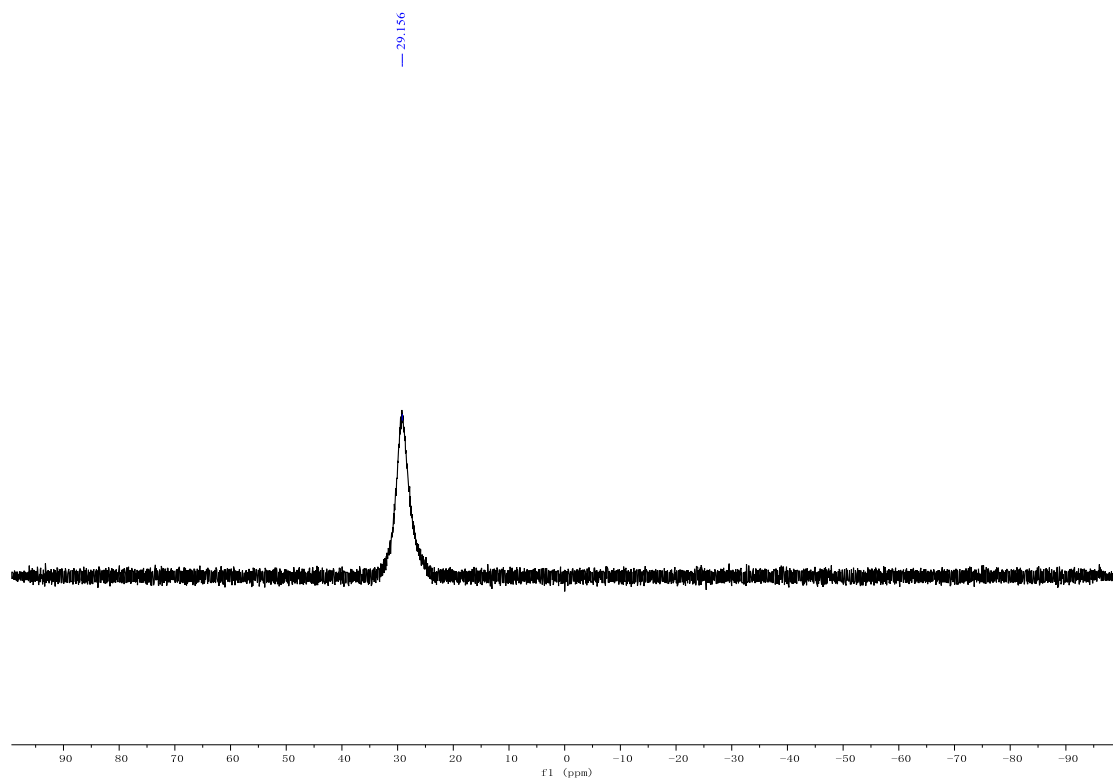

**(*Z*)-tert-butyl((4-(dimethyl(phenyl)silyl)-5-(4,4,5,5-tetramethyl-1,3,2-dioxaborolan-2-yl)pent-4-en-1-yl)oxy)dimethylsilane (4i).**

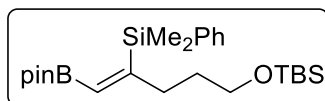

This compound was prepared by the general procedure B described above and was obtained as colorless oil in 70% yield (64.5 mg).  $R_f$  = 0.40 (Petroleum ether:Et<sub>2</sub>O= 98:2).

**<sup>1</sup>H NMR** (400 MHz, Chloroform-*d*)  $\delta$  7.58 – 7.49 (m, 2H), 7.33 – 7.27 (m, 3H), 6.20 (t,  $J$  = 1.4 Hz, 1H), 3.54 (t,  $J$  = 6.4 Hz, 2H), 2.32 – 2.21 (m, 2H), 1.65 – 1.52 (m, 2H), 1.06 (s, 12H), 0.87 (s, 9H), 0.45 (s, 6H), 0.01 (s, 6H).

**<sup>13</sup>C NMR** (101 MHz, Chloroform-*d*)  $\delta$  166.07, 140.48, 134.12, 128.50, 127.55, 83.21, 63.02, 38.78, 32.82, 26.11, 24.81, 18.46, -0.71, -5.14.

**<sup>11</sup>B NMR** (128 MHz, Chloroform-*d*)  $\delta$  29.62.

**HRMS** (ESI)  $m/z$  calculated for C<sub>25</sub>H<sub>45</sub>BO<sub>3</sub>Si<sub>2</sub>Na [M+Na]<sup>+</sup>: 483.2898, found: 483.2902.

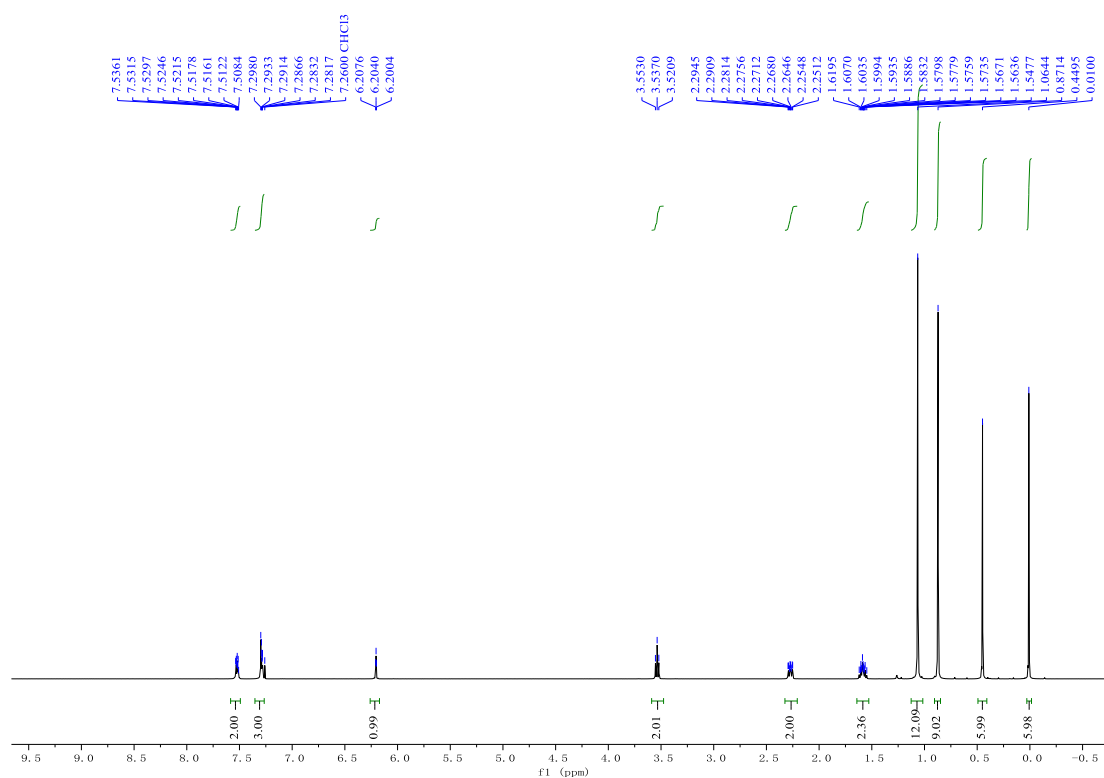

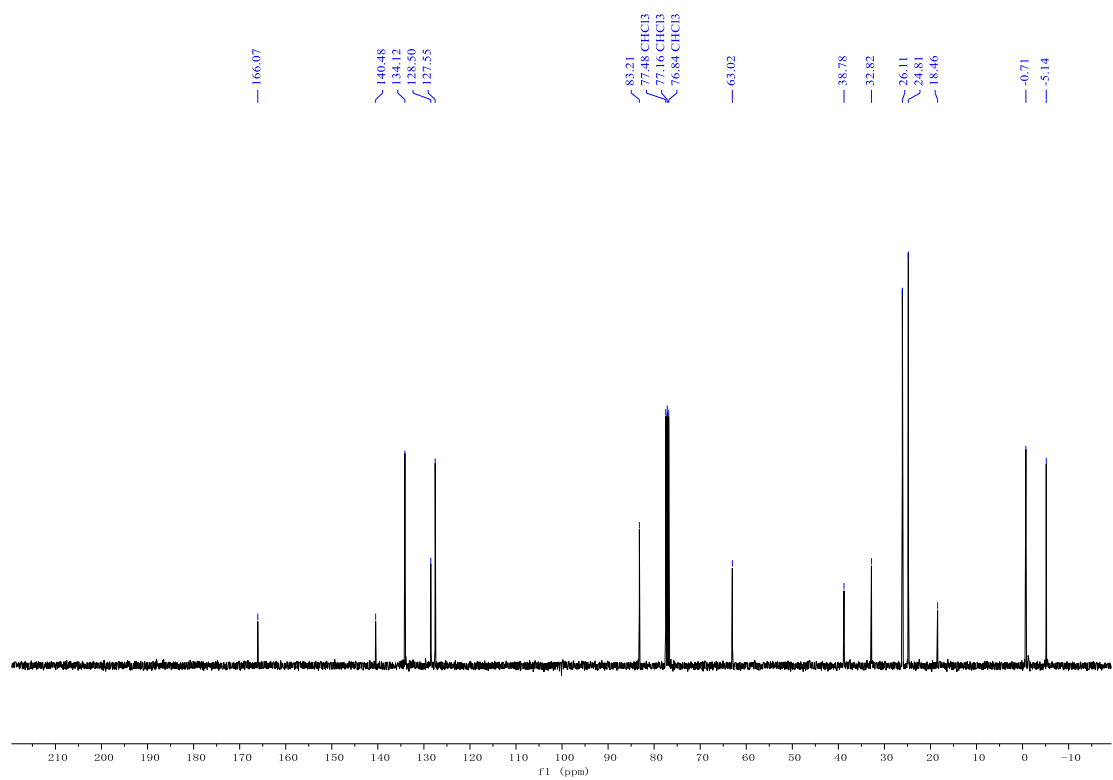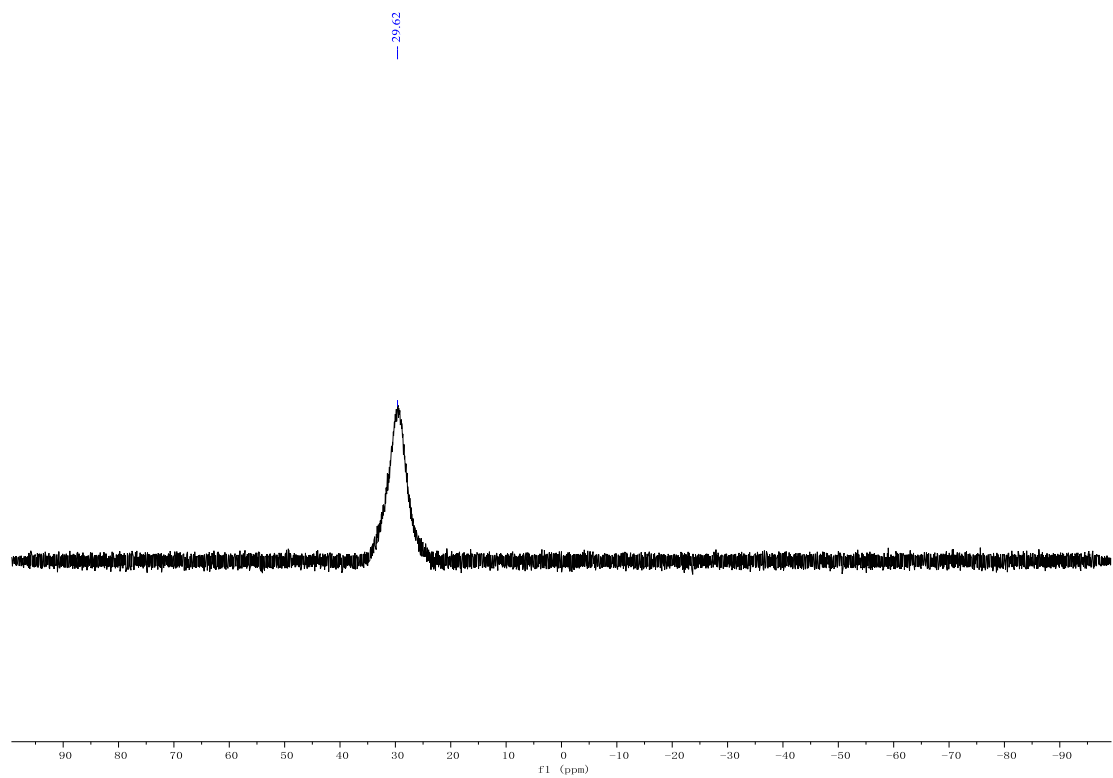

**(Z)-(5-(benzyloxy)-1-(4,4,5,5-tetramethyl-1,3,2-dioxaborolan-2-yl)pent-1-en-2-yl)dimethyl (phenyl)silane (4j).**

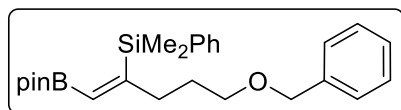

This compound was prepared by the general procedure B described above and was obtained as colorless oil in 54% yield (47.1 mg).  $R_f = 0.38$  (Petroleum ether:EtOAc = 95:5).

**$^1\text{H}$  NMR** (400 MHz, Chloroform- $d$ )  $\delta$  7.55 – 7.50 (m, 2H), 7.36 – 7.26 (m, 8H), 6.21 (t,  $J = 1.4$  Hz, 1H), 4.44 (s, 2H), 3.40 (t,  $J = 6.6$  Hz, 2H), 2.31 (ddd,  $J = 9.5, 5.7, 1.4$  Hz, 2H), 1.81 – 1.62 (m, 2H), 1.07 (s, 12H), 0.45 (s, 6H).

**$^{13}\text{C}$  NMR** (101 MHz, Chloroform- $d$ )  $\delta$  165.70, 140.38, 138.82, 134.14, 128.54, 128.45, 127.69, 127.57, 127.55, 83.26, 72.78, 70.11, 38.94, 29.50, 24.83, -0.73.

**$^{11}\text{B}$  NMR** (128 MHz, Chloroform- $d$ )  $\delta$  29.40.

**HRMS** (ESI)  $m/z$  calculated for  $\text{C}_{26}\text{H}_{37}\text{BO}_3\text{SiNa}$   $[\text{M}+\text{Na}]^+$ : 459.2503, found: 459.2503.

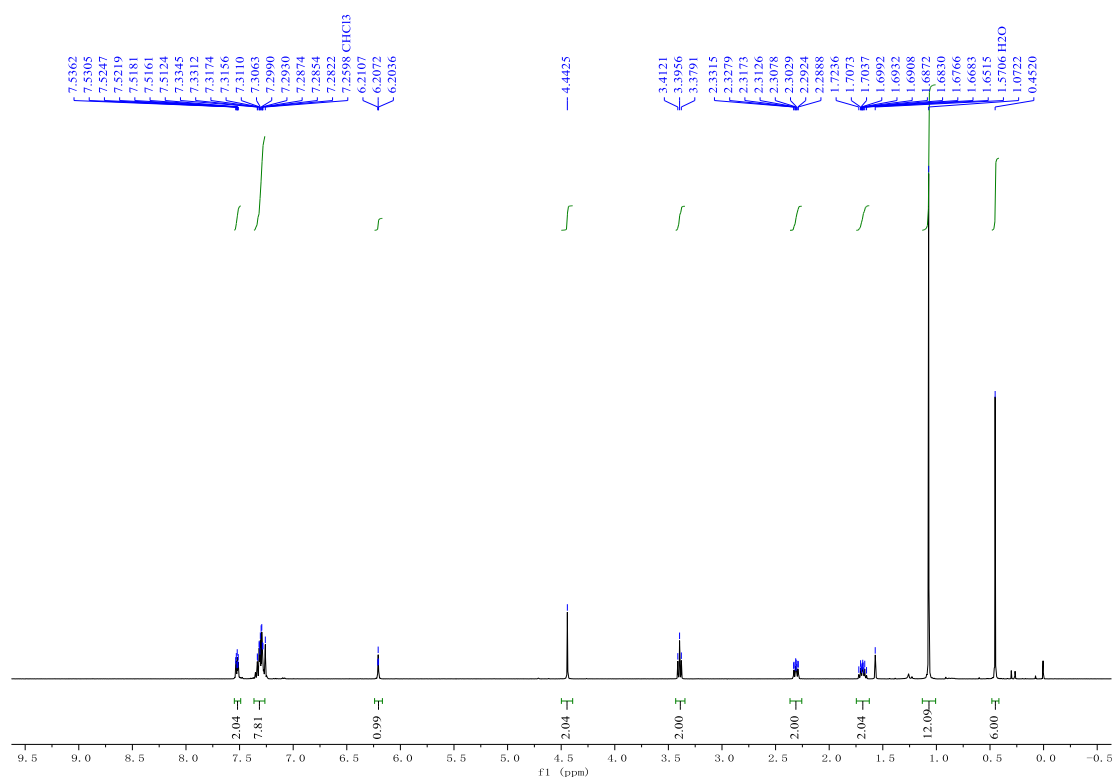

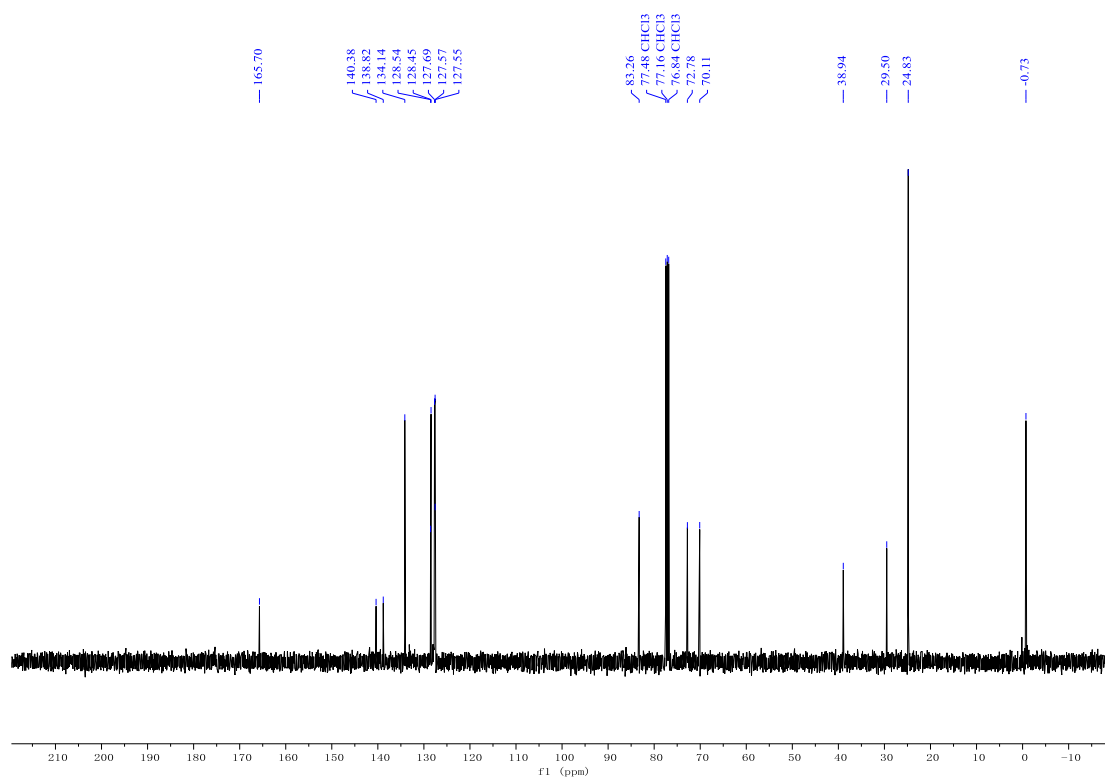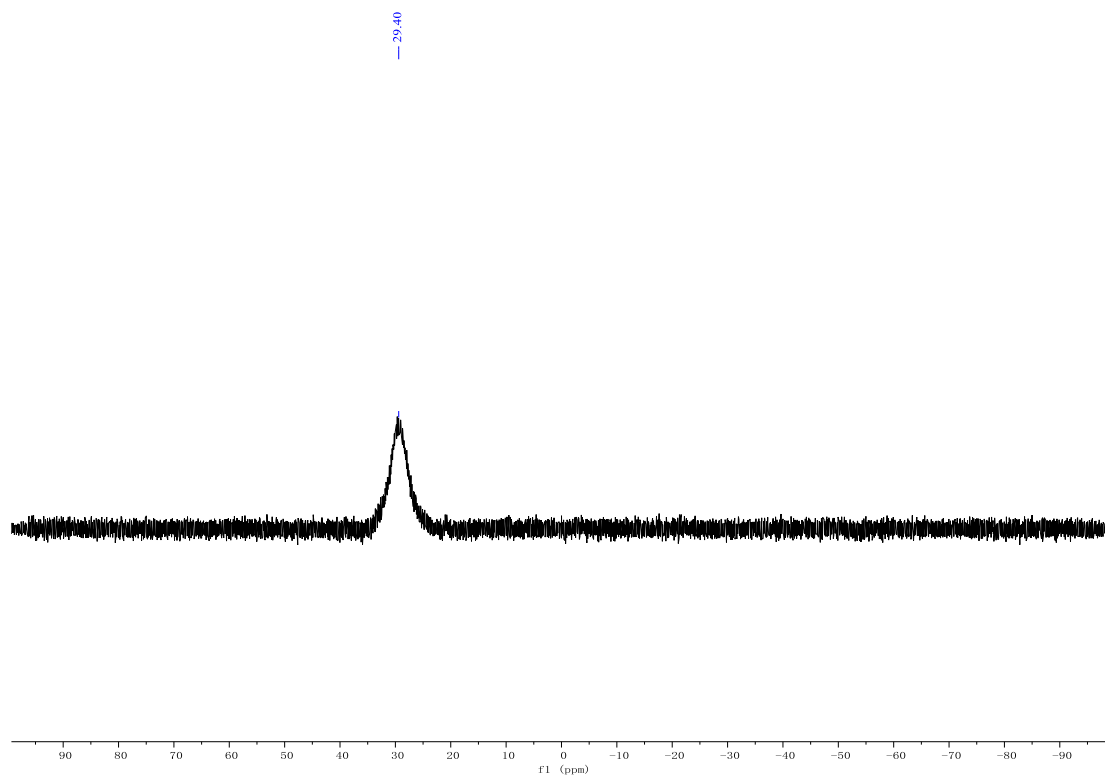

**(Z)-dimethyl(phenyl)(5-((tetrahydro-2H-pyran-2-yl)oxy)-1-(4,4,5,5-tetramethyl-1,3,2-dioxaborolan-2-yl)pent-1-en-2-yl)silane (4k).**

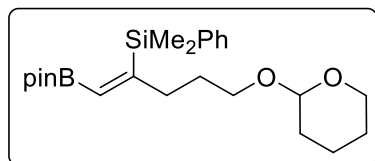

This compound was prepared by the general procedure B described above and was obtained as colorless oil in 72% yield (62.0 mg).  $R_f$  = 0.32 (Petroleum ether:EtOAc = 95:5).

**$^1\text{H}$  NMR** (400 MHz, Chloroform- $d$ )  $\delta$  7.56 – 7.48 (m, 2H), 7.32 – 7.25 (m, 3H), 6.21 (t,  $J$  = 1.4 Hz, 1H), 4.52 (dd,  $J$  = 4.2, 2.8 Hz, 1H), 3.80 (ddd,  $J$  = 11.1, 7.9, 3.1 Hz, 1H), 3.64 (dt,  $J$  = 9.7, 6.7 Hz, 1H), 3.46 (dt,  $J$  = 10.6, 5.0 Hz, 1H), 3.32 (dt,  $J$  = 9.7, 6.5 Hz, 1H), 2.39 – 2.21 (m, 2H), 1.86 – 1.73 (m, 1H), 1.72 – 1.60 (m, 3H), 1.60 – 1.44 (m, 4H), 1.06 (s, 12H), 0.45 (s, 6H).

**$^{13}\text{C}$  NMR** (101 MHz, Chloroform- $d$ )  $\delta$  165.76, 140.41, 134.11, 128.50, 127.53, 98.62, 83.21, 67.12, 62.18, 39.09, 30.82, 29.59, 25.64, 24.80, 19.60, -0.75.

**$^{11}\text{B}$  NMR** (128 MHz, Chloroform- $d$ )  $\delta$  29.03.

**HRMS** (ESI)  $m/z$  calculated for  $\text{C}_{24}\text{H}_{39}\text{BO}_4\text{SiNa}$   $[\text{M}+\text{Na}]^+$ : 453.2608, found: 453.2603.

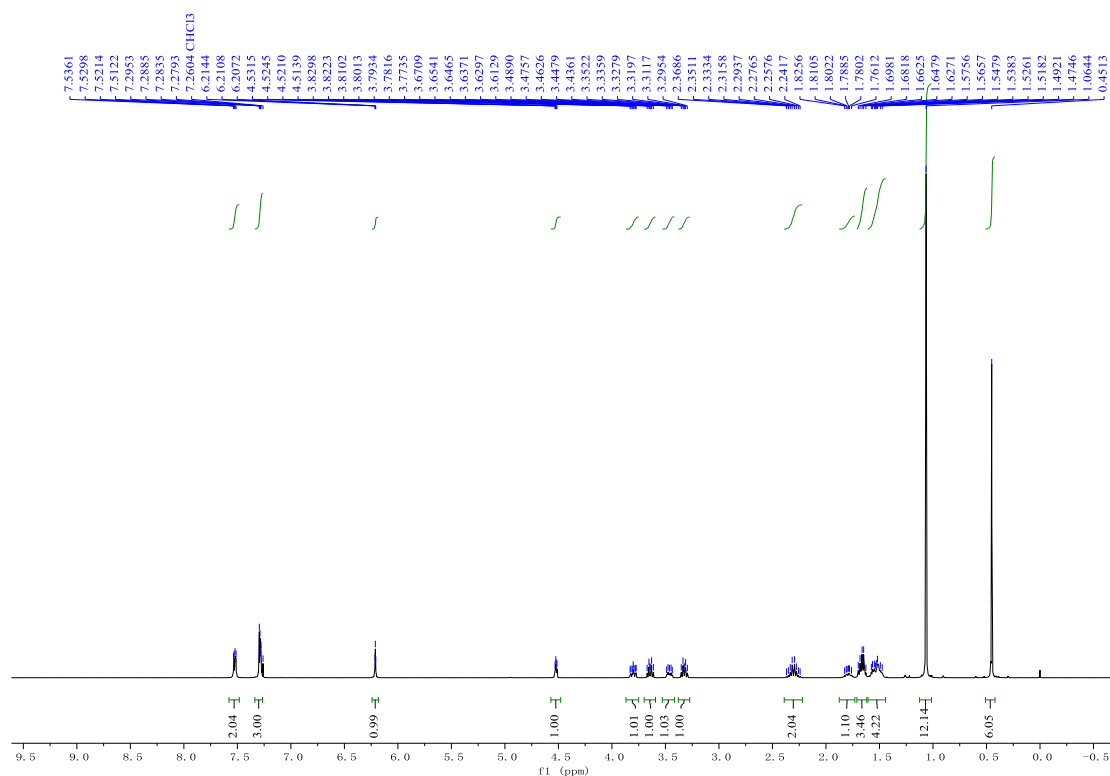

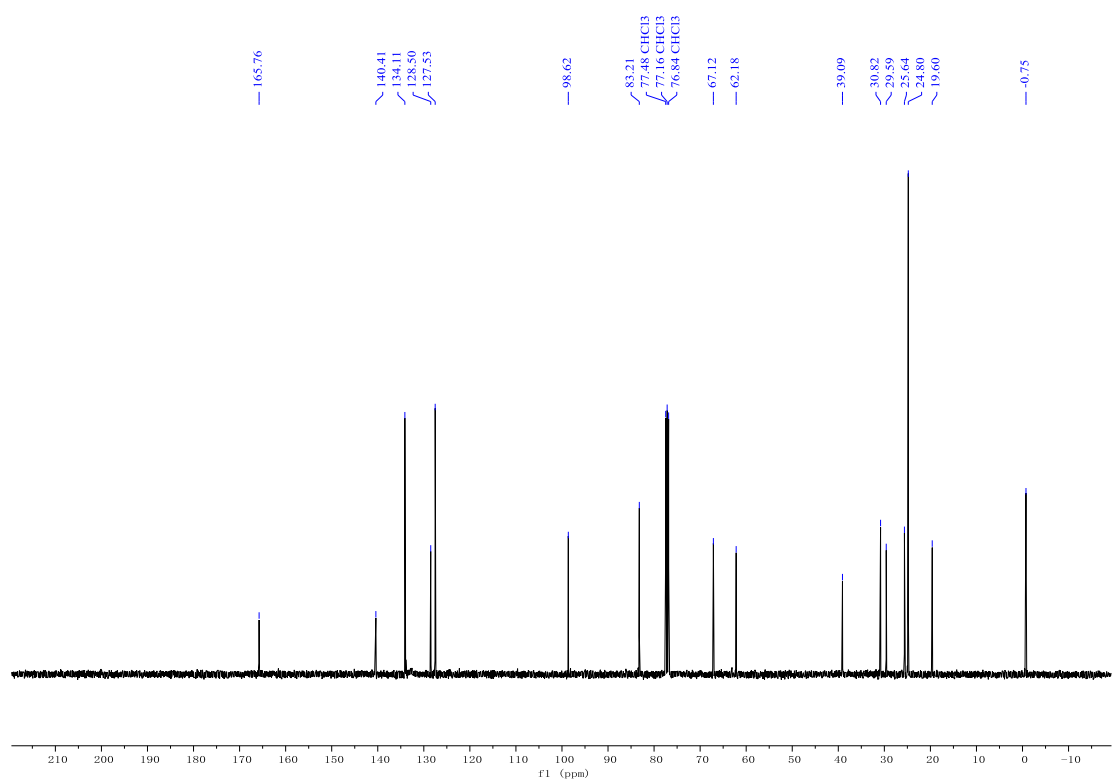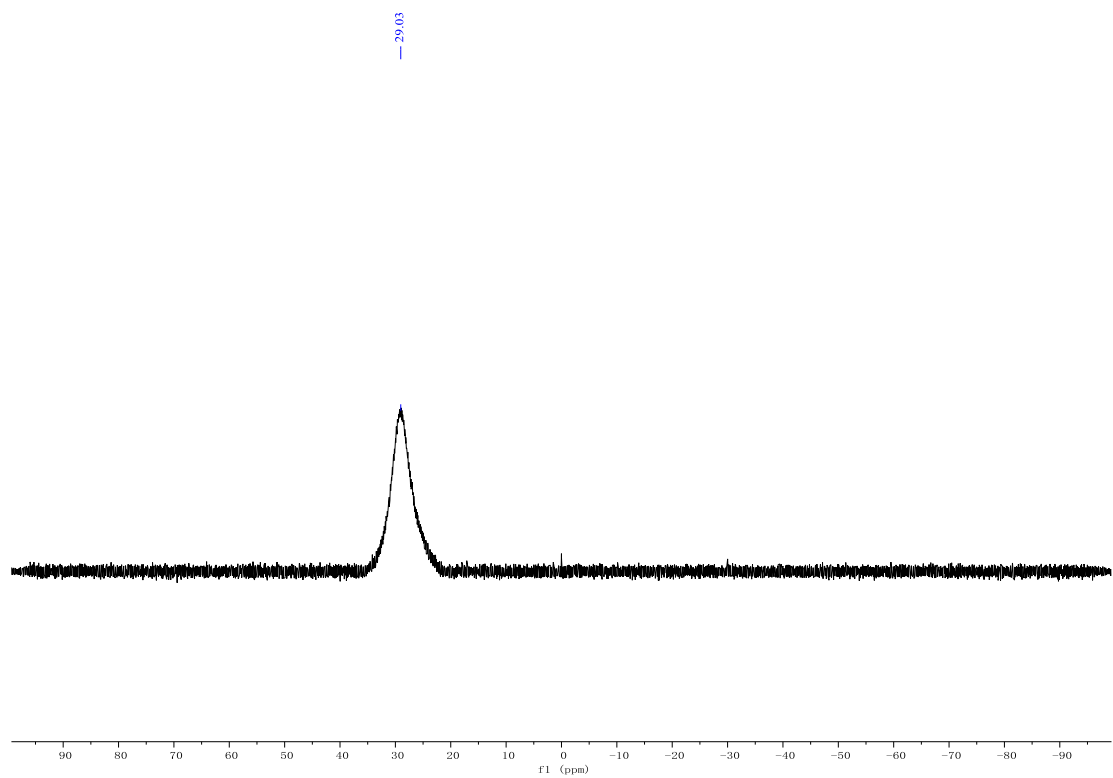



**(Z)-2-(4-(dimethyl(phenyl)silyl)-5-(4,4,5,5-tetramethyl-1,3,2-dioxaborolan-2-yl)pent-4-en-1-yl)isoindoline-1,3-dione (4m).**

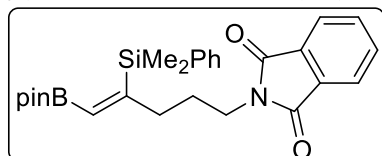

This compound was prepared by the general procedure B described above and was obtained as white solid in 50% yield (47.5 mg).  $R_f = 0.21$  (Petroleum ether:Et<sub>2</sub>O = 75:25).

**<sup>1</sup>H NMR** (400 MHz, CDCl<sub>3</sub>)  $\delta$  7.82 (dd,  $J = 5.5, 3.0$  Hz, 2H), 7.70 (dd,  $J = 5.4, 3.0$  Hz, 2H), 7.53 – 7.45 (m, 2H), 7.27 – 7.14 (m, 3H), 6.19 (s, 1H), 3.60 (t,  $J = 7.1$  Hz, 2H), 2.32 – 2.19 (m, 2H), 1.75 – 1.65 (m, 2H), 1.07 (s, 12H), 0.44 (s, 6H).

**<sup>13</sup>C NMR** (101 MHz, CDCl<sub>3</sub>)  $\delta$  168.39, 165.07, 140.04, 134.08, 133.89, 132.29, 128.52, 127.52, 123.25, 83.27, 40.11, 37.97, 28.59, 24.81, -0.89.

**<sup>11</sup>B NMR** (128 MHz, CDCl<sub>3</sub>)  $\delta$  29.28.

**HRMS** (ESI)  $m/z$  calculated for C<sub>27</sub>H<sub>34</sub>BNO<sub>4</sub>SiNa [M+Na]<sup>+</sup>: 498.2248, found: 498.2245.

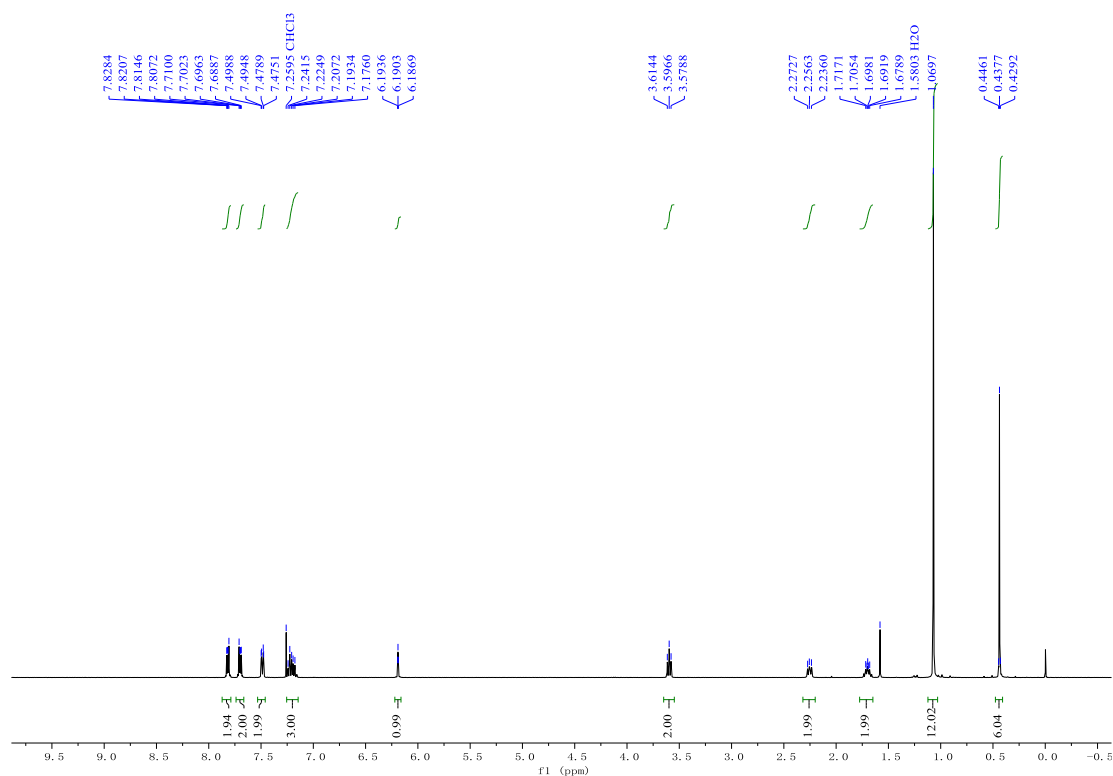

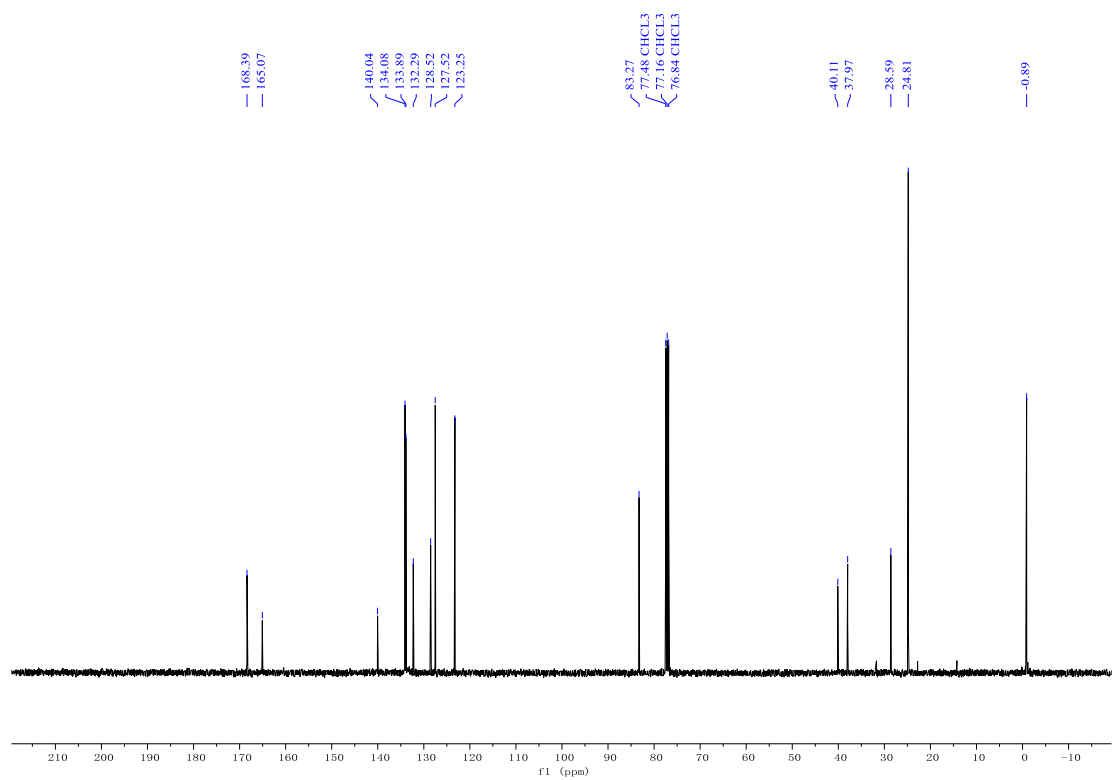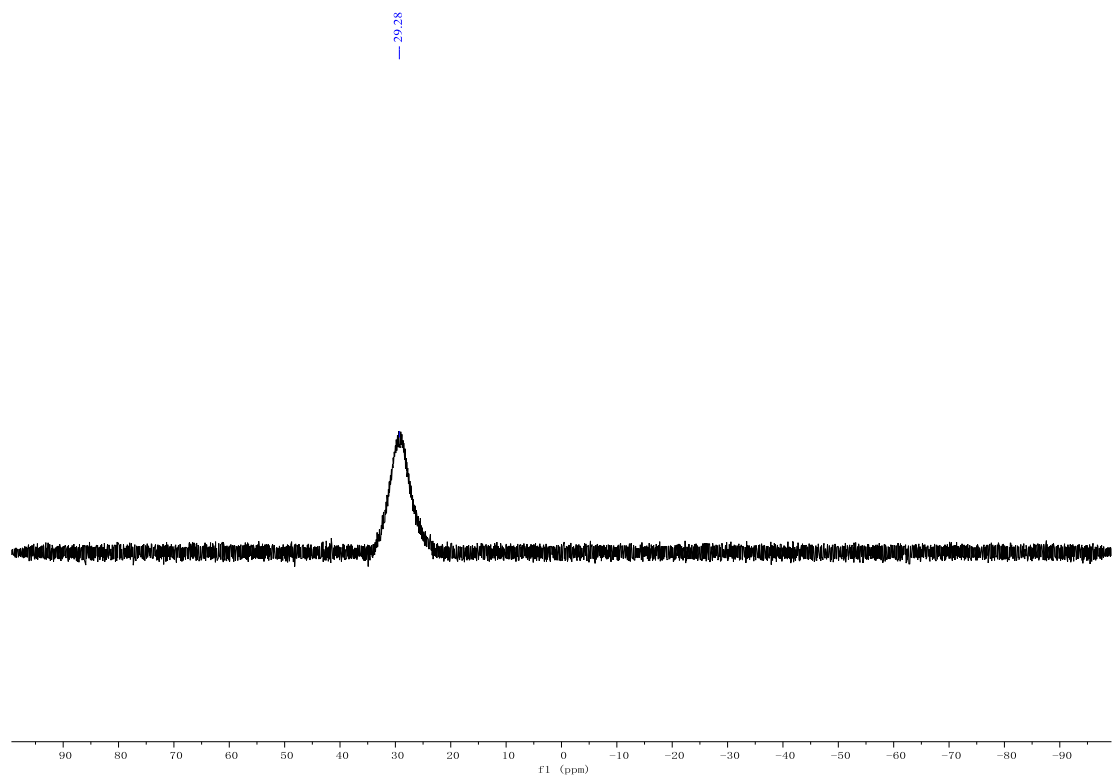

**(Z)-(5-chloro-1-(4,4,5,5-tetramethyl-1,3,2-dioxaborolan-2-yl)pent-1-en-2-yl)dimethyl(phenyl)silane (4n).**

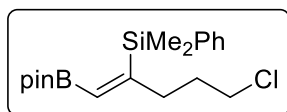

This compound was prepared by the general procedure B described above and was obtained as colorless oil in 55% yield (40.1 mg).  $R_f = 0.33$  (Petroleum ether:EtOAc = 98:2).

**$^1\text{H}$  NMR** (400 MHz, Chloroform- $d$ )  $\delta$  7.56 – 7.49 (m, 2H), 7.34 – 7.28 (m, 3H), 6.21 (t,  $J = 1.4$  Hz, 1H), 3.43 (t,  $J = 6.7$  Hz, 2H), 2.36 (td,  $J = 7.5, 1.4$  Hz, 2H), 1.88 – 1.75 (m, 2H), 1.09 (s, 12H), 0.46 (s, 6H).

**$^{13}\text{C}$  NMR** (101 MHz, Chloroform- $d$ )  $\delta$  164.38, 140.00, 134.11, 128.70, 127.65, 83.38, 44.68, 39.47, 32.33, 24.85, -0.80.

**$^{11}\text{B}$  NMR** (128 MHz, Chloroform- $d$ )  $\delta$  29.47.

**HRMS** (ESI)  $m/z$  calculated for  $\text{C}_{19}\text{H}_{30}\text{BClOSiNa}$   $[\text{M}+\text{Na}]^+$ : 387.1694, found: 387.1681.

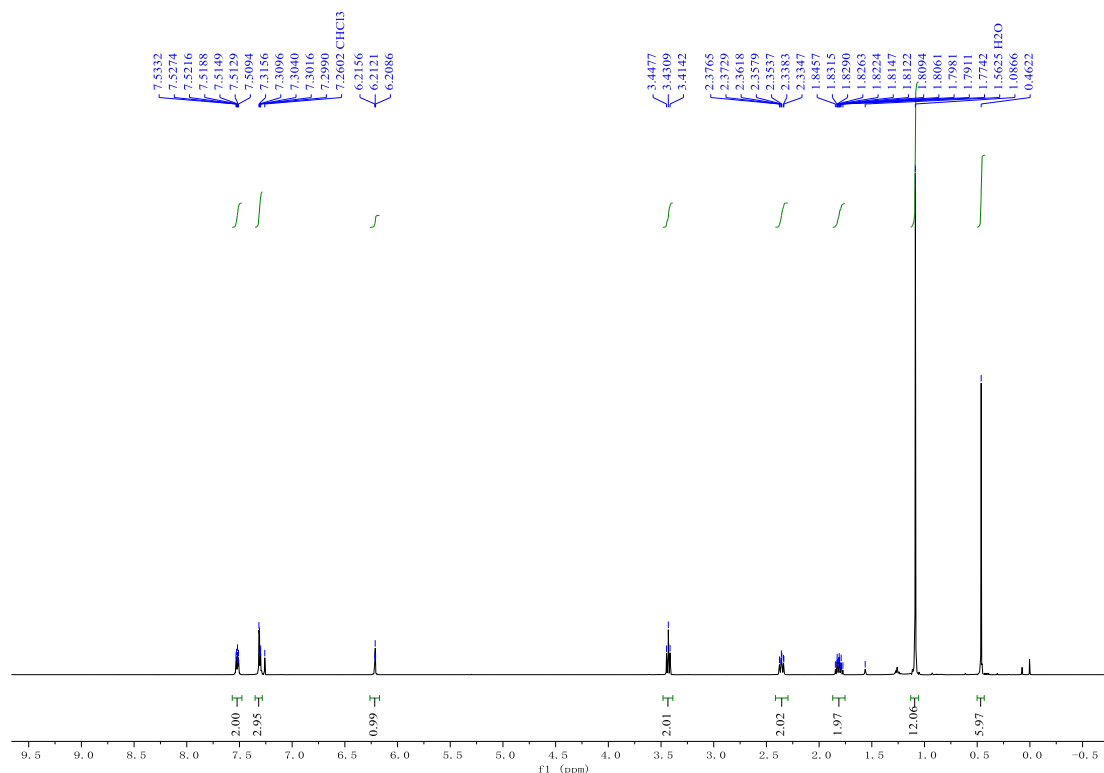

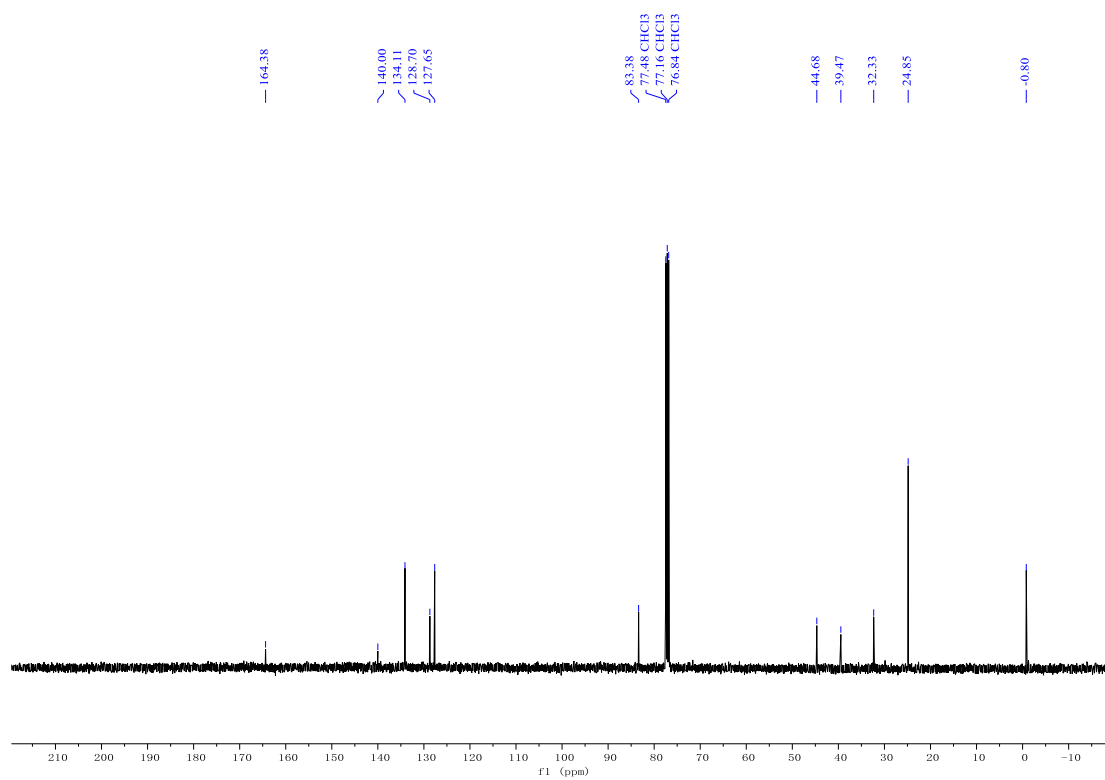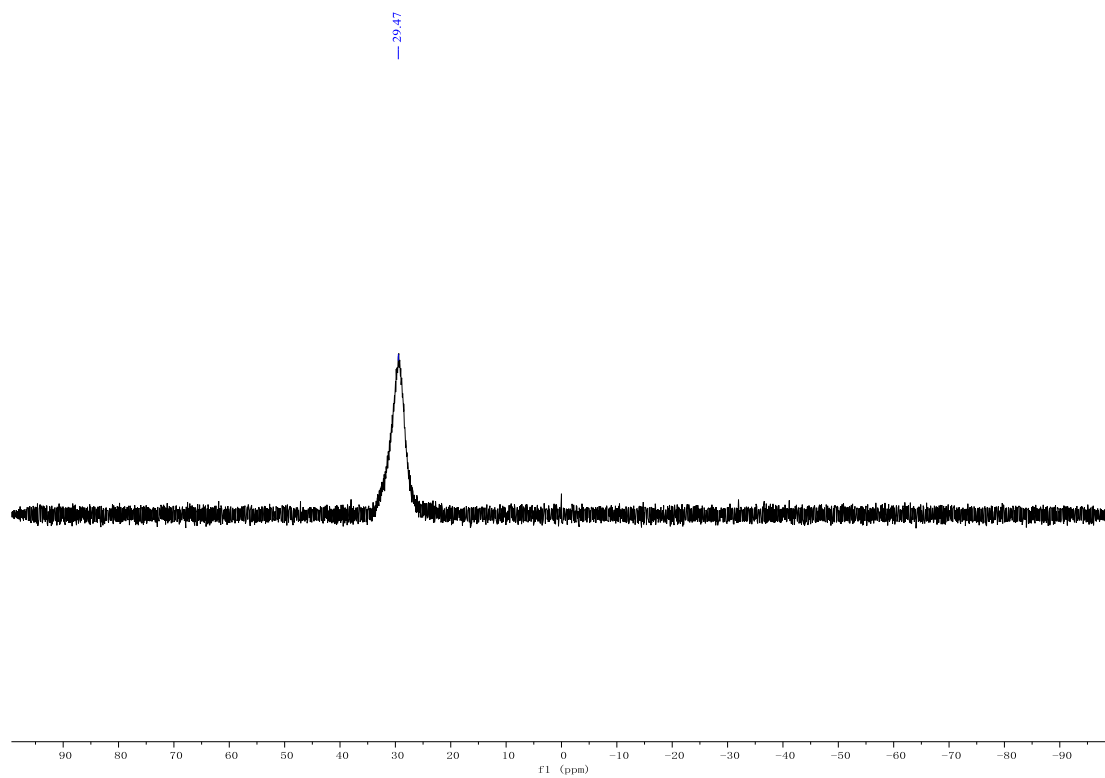

**(Z)-dimethyl(phenyl)(1-(4,4,5,5-tetramethyl-1,3,2-dioxaborolan-2-yl)hexa-1,5-dien-2-yl)Silane (4p).**

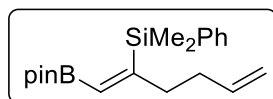

This compound was prepared by the general procedure B described above and was obtained as colorless oil in 63% yield (42.6 mg).  $R_f$  = 0.48 (Petroleum ether:EtOAc = 98:2).

**$^1\text{H}$  NMR** (400 MHz, Chloroform- $d$ )  $\delta$  7.56 – 7.51 (m, 2H), 7.34 – 7.26 (m, 3H), 6.20 (t,  $J$  = 1.4 Hz, 1H), 5.75 (ddt,  $J$  = 16.8, 10.1, 6.6 Hz, 1H), 4.97 – 4.87 (m, 2H), 2.34 – 2.28 (m, 2H), 2.15 – 2.06 (m, 2H), 1.07 (s, 12H), 0.46 (s, 6H).

**$^{13}\text{C}$  NMR** (101 MHz, Chloroform- $d$ )  $\delta$  165.47, 140.36, 138.50, 134.15, 128.57, 127.57, 114.60, 83.27, 41.90, 33.87, 24.83, -0.76.

**$^{11}\text{B}$  NMR** (128 MHz, Chloroform- $d$ )  $\delta$  29.81.

**HRMS** (ESI)  $m/z$  calculated for  $\text{C}_{20}\text{H}_{31}\text{BO}_2\text{SiNa}$   $[\text{M}+\text{Na}]^+$ : 365.2084, found: 365.2086.

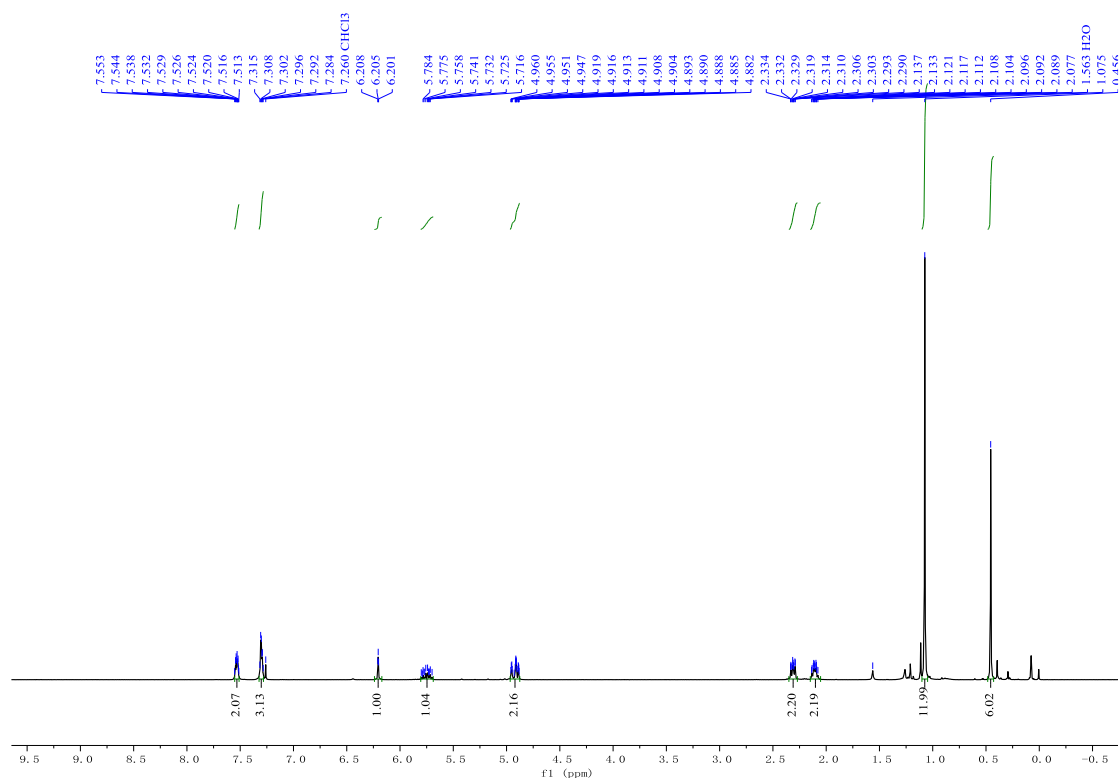

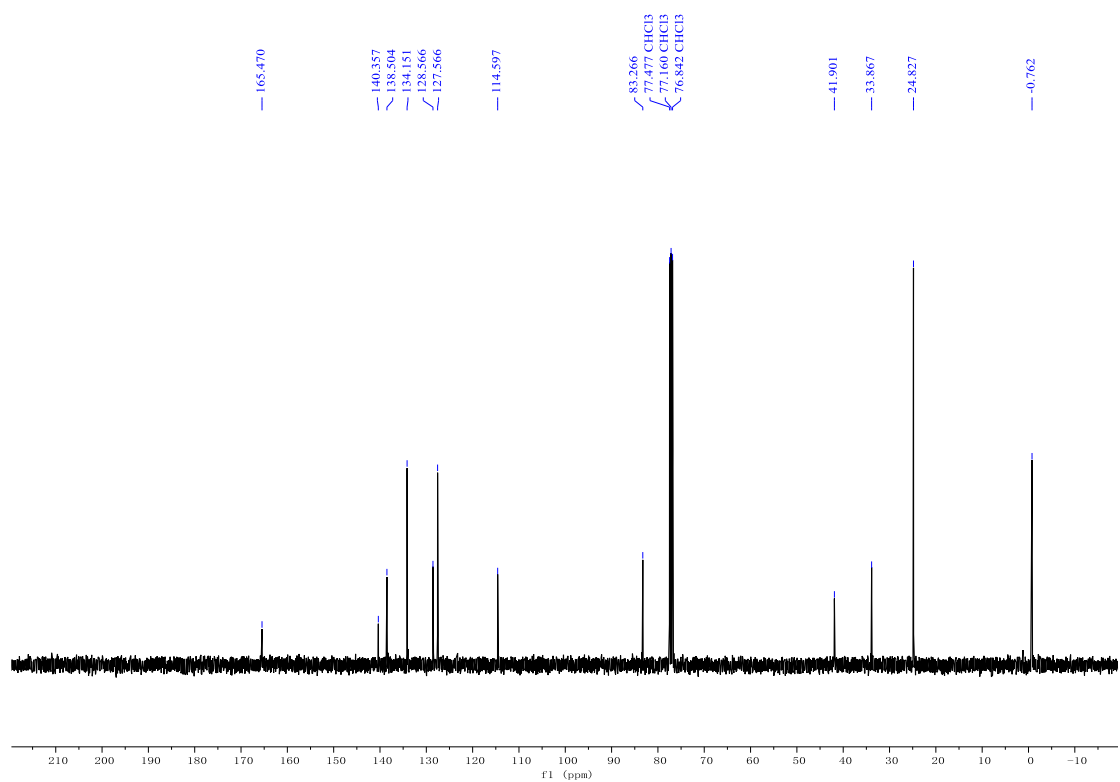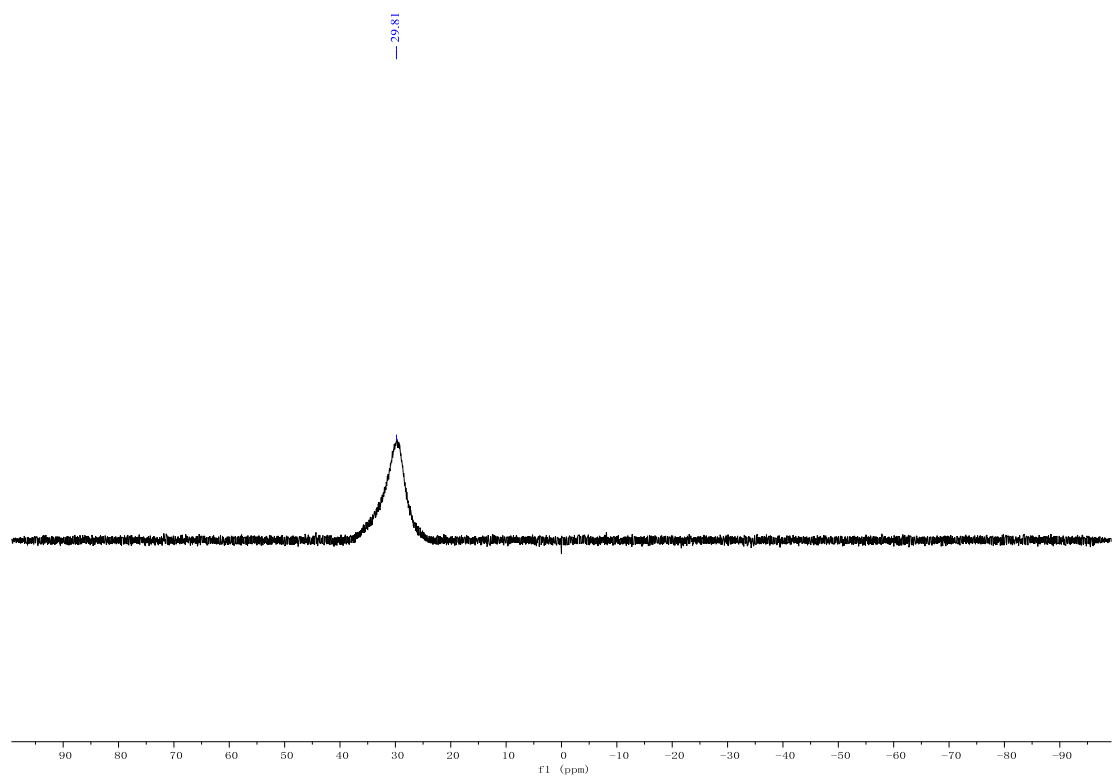

**(Z)-(2-(dimethyl(phenyl)silyl)-3-(4,4,5,5-tetramethyl-1,3,2-dioxaborolan-2-yl)allyl)trimethyl Silane (4q).**

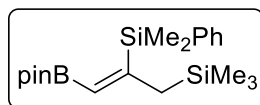

This compound was prepared by the general procedure B described above and was obtained as colorless oil in 62% yield (46.4 mg).  $R_f = 0.44$  (Petroleum ether:Et<sub>2</sub>O = 98:2).

**<sup>1</sup>H NMR** (400 MHz, Chloroform-*d*)  $\delta$  7.55 – 7.49 (m, 2H), 7.31 – 7.26 (m, 3H), 6.03 (t,  $J = 1.2$  Hz, 1H), 1.95 (s, 2H), 1.03 (s, 12H), 0.44 (s, 6H), -0.02 (s, 9H).

**<sup>13</sup>C NMR** (101 MHz, Chloroform-*d*)  $\delta$  165.57, 140.89, 134.24, 128.35, 127.42, 82.93, 33.46, 24.73, -0.18, -0.83.

**<sup>11</sup>B NMR** (128 MHz, Chloroform-*d*)  $\delta$  29.15.

**HRMS** (ESI)  $m/z$  calculated for C<sub>20</sub>H<sub>35</sub>BO<sub>2</sub>SiNa [M+Na]<sup>+</sup>: 397.2166, found: 397.2178.

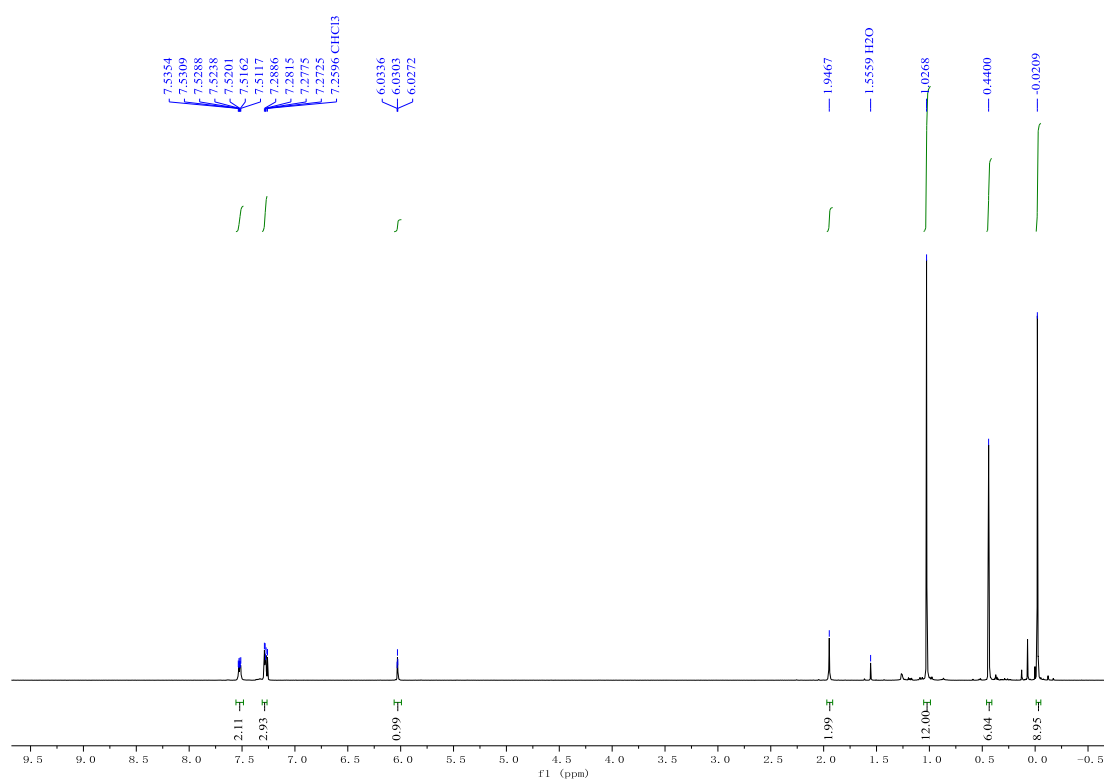

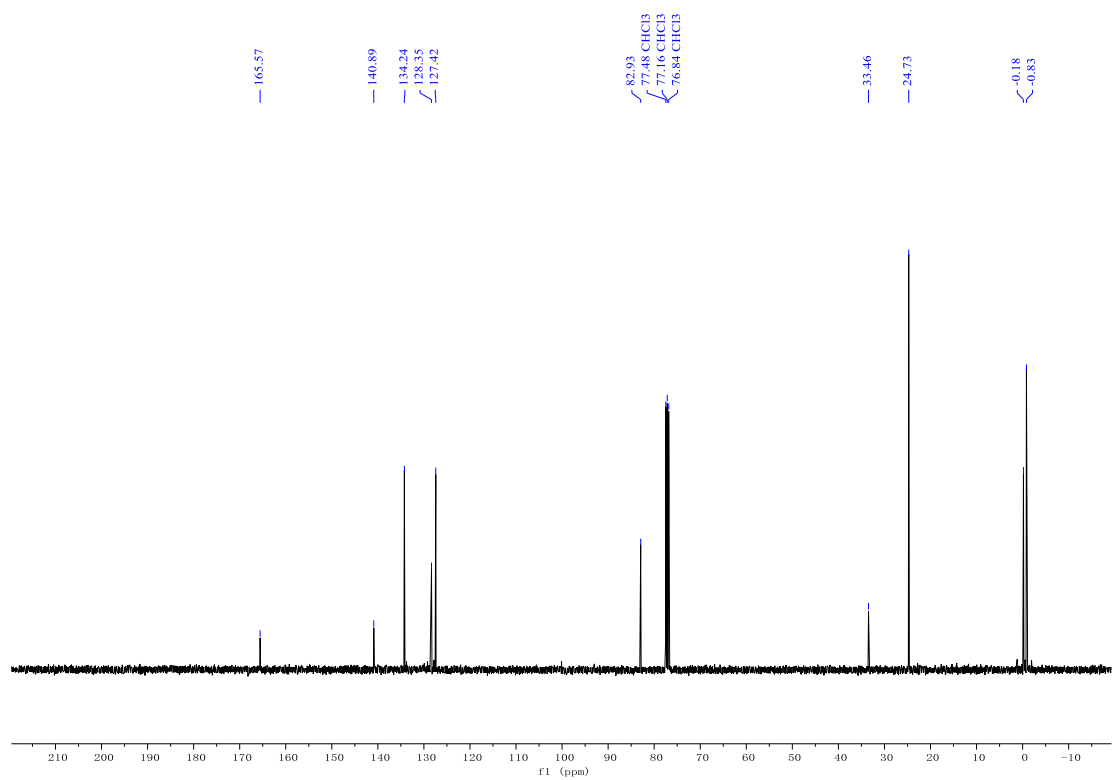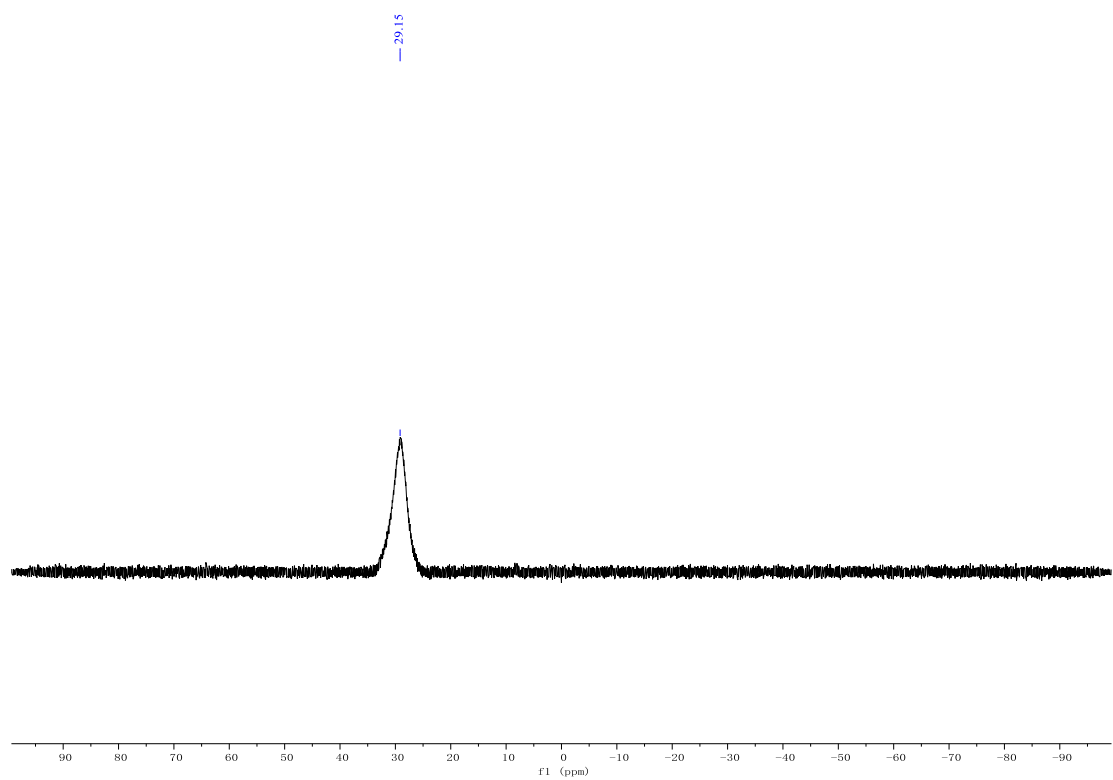



**(E)-(4-(benzyloxy)styryl)dimethyl(phenyl)silane (5u).**

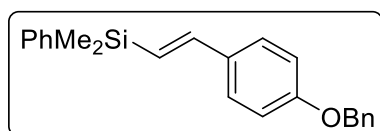

This compound was prepared by the general procedure A described above and was obtained as colorless oil in 43% yield (29.7 mg).  $R_f = 0.40$  (Petroleum ether:EtOAc = 98:2).

**$^1\text{H}$  NMR** (400 MHz, Chloroform- $d$ )  $\delta$  7.63 – 7.56 (m, 2H), 7.48 – 7.32 (m, 10H), 6.98 – 6.94 (m, 2H), 6.91 (d,  $J = 19.1$  Hz, 1H), 6.44 (d,  $J = 19.1$  Hz, 1H), 5.09 (s, 2H), 0.45 (s, 6H).

**$^{13}\text{C}$  NMR** (101 MHz, Chloroform- $d$ )  $\delta$  159.01, 144.82, 138.98, 137.01, 134.05, 131.56, 129.11, 128.71, 128.11, 127.92, 127.91, 127.58, 124.52, 115.01, 70.15, -2.29.

**HRMS** (ESI)  $m/z$  calculated for  $\text{C}_{23}\text{H}_{25}\text{OSi}$   $[\text{M}+\text{H}]^+$ : 345.1675, found: 345.1665.

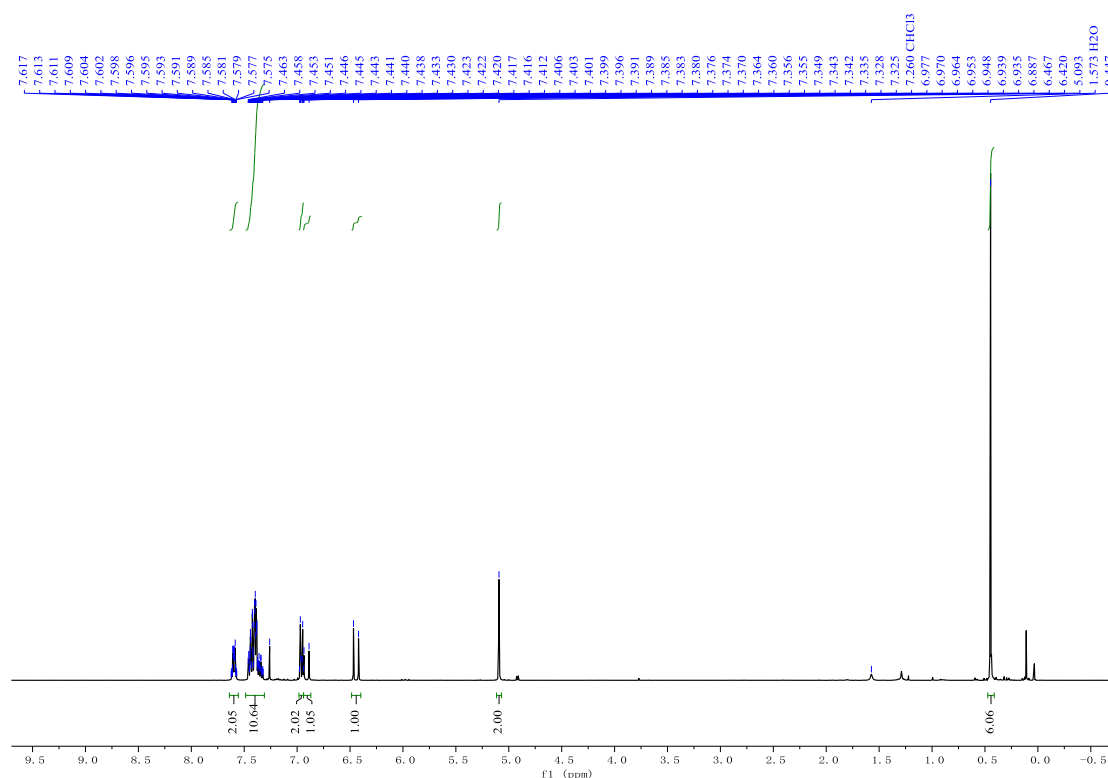

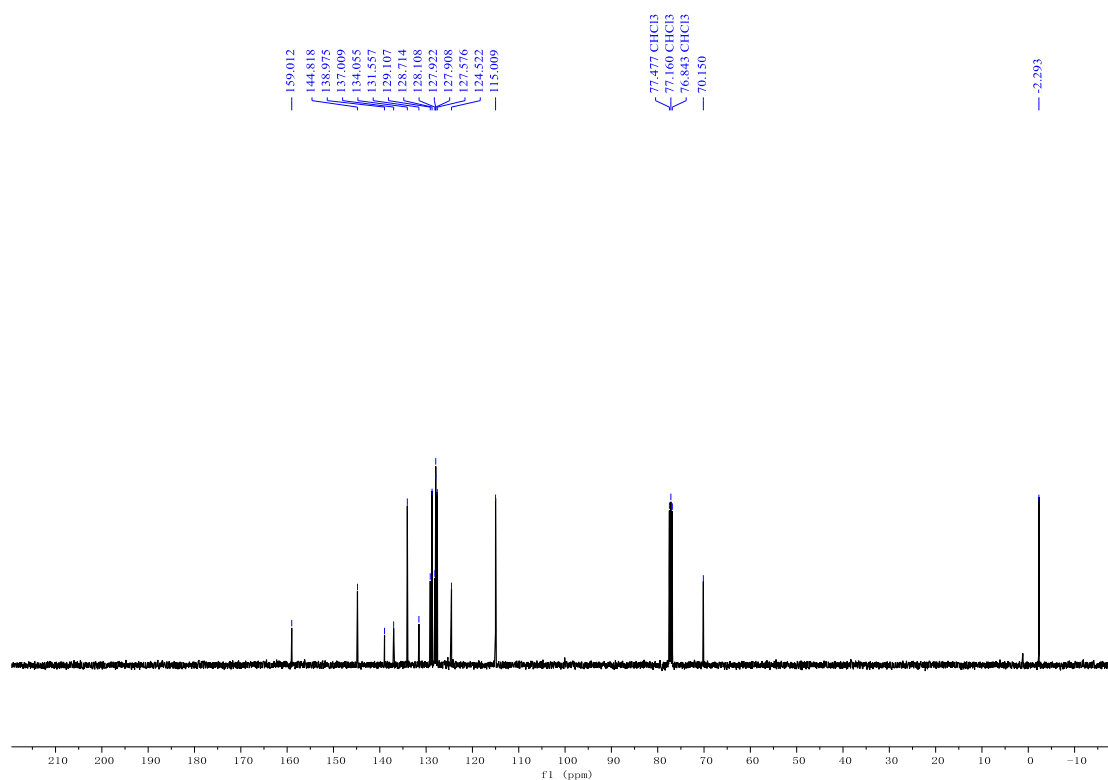

**(*E*)-(4-(benzyloxy)styryl)dimethyl(phenyl)silane (5u').**

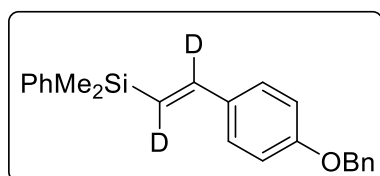

This compound was prepared by the general procedure A described above and was obtained as colorless oil in 46% yield (31.8 mg).  $R_f = 0.40$  (Petroleum ether:EtOAc = 98:2).

**$^1\text{H}$  NMR** (400 MHz, Chloroform-*d*)  $\delta$  7.62 – 7.56 (m, 2H), 7.48 – 7.31 (m, 10H), 6.98 – 6.92 (m, 2H), 5.09 (s, 2H), 0.44 (s, 6H).

**$^{13}\text{C}$  NMR** (101 MHz, Chloroform-*d*)  $\delta$  159.00, 138.99, 137.02, 134.06, 131.48, 129.11, 128.72, 128.12, 127.93, 127.89, 127.58, 115.01, 70.16, -2.30.

**HRMS** (ESI)  $m/z$  calculated for  $\text{C}_{23}\text{H}_{23}\text{D}_2\text{OSiN}$   $[\text{M}+\text{H}]^+$ : 347.1800, found: 347.1793.

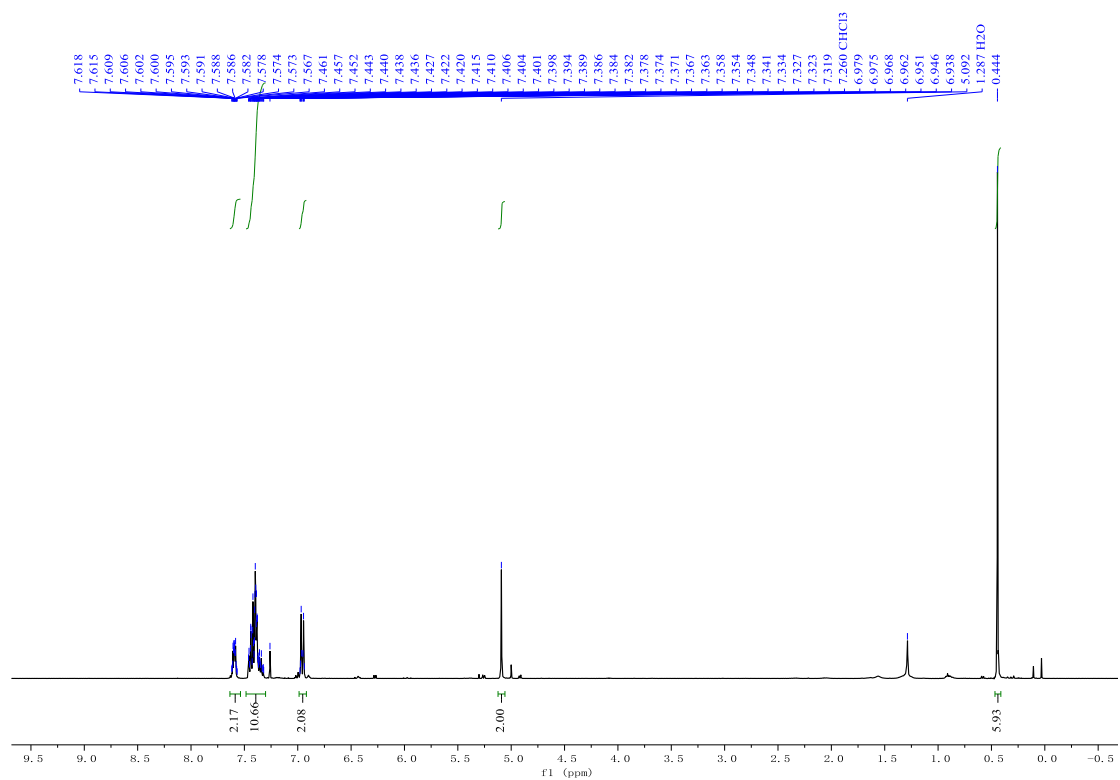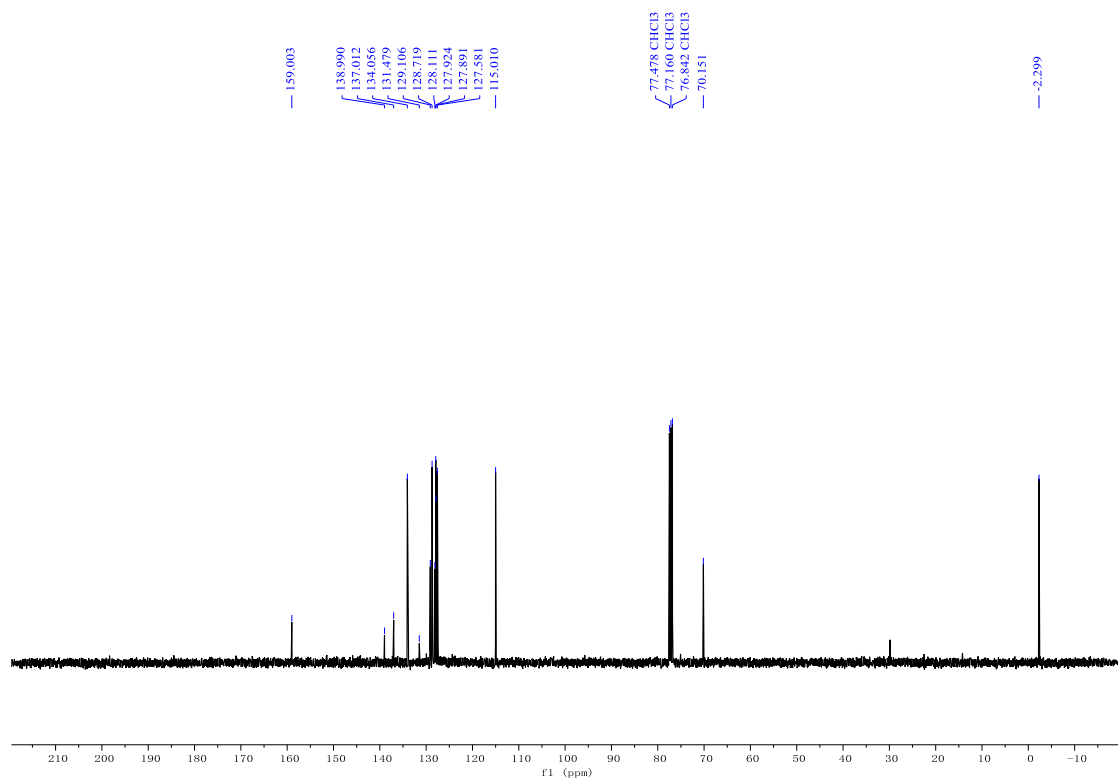

## IV. Stereochemistry Analysis of Products

Figure S1. 1D-NOE spectroscopy of 3s

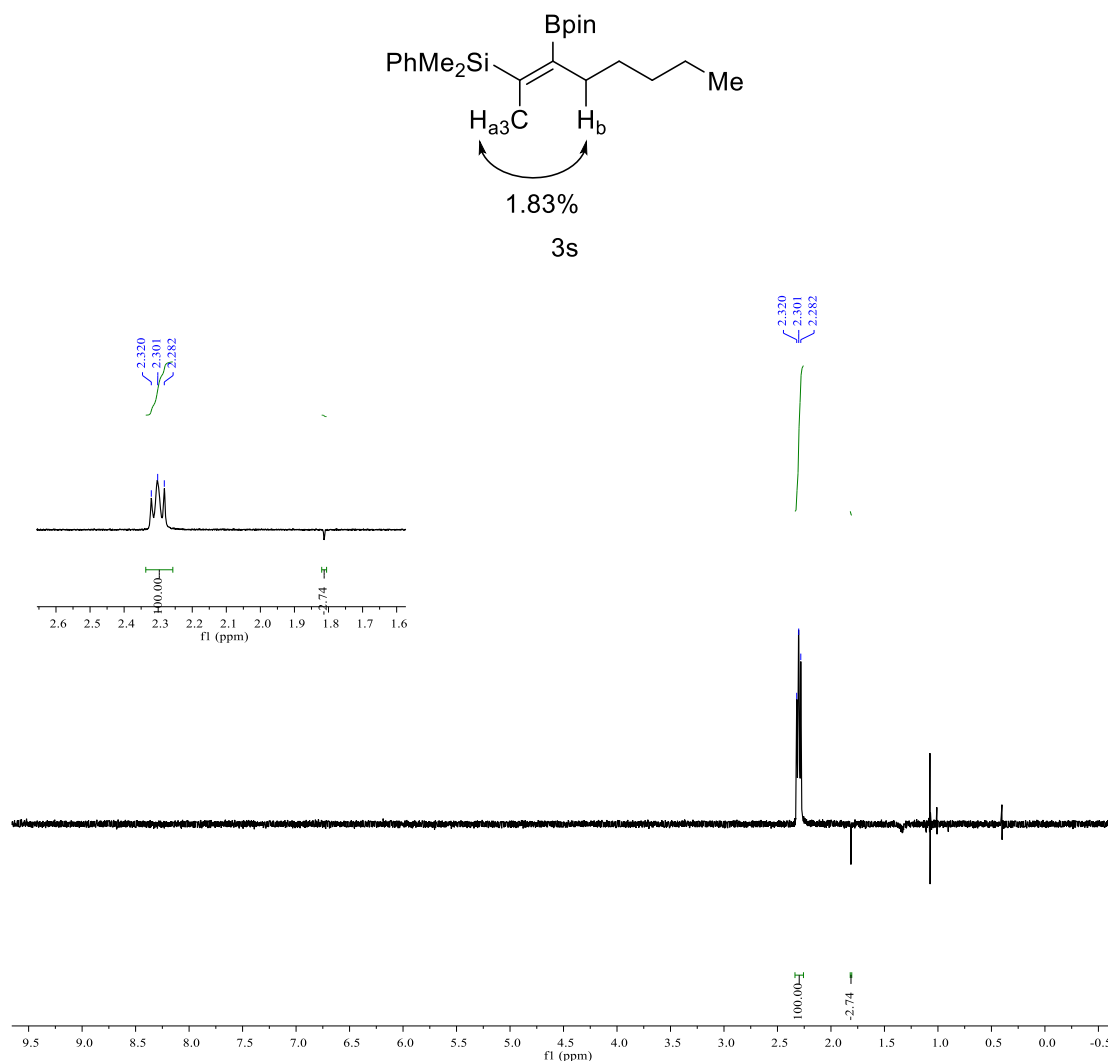

## V. References

1. Curini, M.; Epifano, F.; Marcotullio, M. C.; Rosati, O.; Rossi, M. *Synth. Commun.* **2007**, *30*, 1319-1329.
2. Wang, S.; Guo, Y. Q.; Ren, Z. H.; Wang, Y. Y.; Guan, Z. H. *Org. Lett.* **2017**, *19*, 1574-1577.
3. Clarke, P. A.; Winn, J. *Tetrahedron Lett.* **2011**, *52*, 1469-1472.
4. Slack, E. D.; Gabriel, C. M.; Lipshutz, B. H. *Angew. Chem., Int. Ed.* **2014**, *53*, 14051-14154.
5. Kawanami, H.; Okada, S.; Matsuda, H.; Doi, T.; Kikuchi, N.; Hayamizu, K.; Oikawa, H.; Nakanishi, H. *Mol. Cryst. Liq. Cryst.* **2006**, *255*, 103-112.
6. Ma, C.-L.; Yu, X.-L.; Zhu, X.-L.; Hu, Y.-Z.; Dong, X.-W.; Tan, B.; Liu, X.-Y. *Adv. Synth. Catal.* **2015**, *357*, 569-575.
7. Yu, T. B.; Bai, J. Z.; Guan, Z. *Angew. Chem., Int. Ed.* **2009**, *48*, 1097-1101.
8. Bizier, N. P.; Wackerly, J. W.; Braunstein, E. D.; Zhang, M.; Nodder, S. T.; Carlin, S. M.; Katz, J. L. *J. Org. Chem.* **2013**, *78*, 5987-5998.
9. Bew, S. P.; Hiatt-Gipson, G. D.; Lovell, J. A.; Poullain, C. *Org. Lett.* **2012**, *14*, 456-459.

- 10.Chen, W.; Wang, B.; Liu, N.; Huang, D.; Wang, X.; Hu, Y. *Org. Lett.* **2014**, *16*, 6140-6143.
- 11.Gandon, V.; Leca, D.; Aechtner, T.; Vollhardt, K. P. C.; Malacria, M.; Aubert, C. *Org. Lett.* **2004**, *6*, 3405-3407.
